# Supplementary material for: Genetic Diversity and Selective Signature in Dabieshan Cattle Revealed by Whole-Genome Resequencing
Source: Biology (Basel). 2022 Sep 8;11(9):1327. doi: 10.3390/biology11091327 (PMC9495734; doi:10.3390/biology11091327)
Supplement: Supplementary file 1 [file biology-11-01327-s001.zip]

Archive with 7 entries (7 files):
- Figure S1.pdf
- Figure S2.pdf
- Figure S3.pdf
- Figure S4.pdf
- Figure S5.pdf
- Figure S6.pdf
- TableS1-TableS14.xlsx
