# Supplementary material for: Genetic Diversity and Selective Signature in Dabieshan Cattle Revealed by Whole-Genome Resequencing
Source: Biology (Basel). 2022 Sep 8;11(9):1327. doi: 10.3390/biology11091327 (PMC9495734; doi:10.3390/biology11091327)
Supplement: Supplementary file 1 [file biology-11-01327-s001.zip › Figure S4.pdf]

## HSPA4

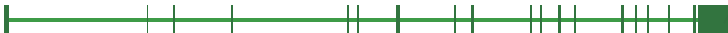

Allele1 G T C C T G T A A A A G

Leu

Allele2 A C A T C A C C C T G C

Pro

| Category  | Method   | Value |
|-----------|----------|-------|
| Dabieshan | Proposed | 0.687 |
|           | Baseline | 0.172 |
|           | Baseline | 0.046 |
|           | Baseline | 0.031 |
|           | Baseline | 0.016 |
| Hanwoo    | Proposed | 0.900 |
|           | Baseline | 0.067 |
|           | Baseline | 0.033 |
