# Supplementary material for: Genetic Diversity and Selective Signature in Dabieshan Cattle Revealed by Whole-Genome Resequencing
Source: Biology (Basel). 2022 Sep 8;11(9):1327. doi: 10.3390/biology11091327 (PMC9495734; doi:10.3390/biology11091327)
Supplement: Supplementary file 1 [file biology-11-01327-s001.zip › TableS1-TableS14.xlsx]

## Sheet: Sheet1
Table S1. Summary of the sequencing data.
Sample ID	Accession number	Group	Breed	Total reads	Mapped reads	Mapping rate	Mean depth (X)	BioProject	Sample origin place		reference
DBS1	SRR18163013	Target group	Dabieshan	167506664	167135593	0.9978	8.6975	PRJNA809958	Taihu, Anhui, China		This study
DBS2	SRR18163011	Target group	Dabieshan	164305985	163872197	0.9974	9.6191	PRJNA809958	Taihu, Anhui, China		This study
DBS3	SRR18163016	Target group	Dabieshan	183246564	182709687	0.9971	8.5328	PRJNA809958	Taihu, Anhui, China		This study
DBS4	SRR18163015	Target group	Dabieshan	185200803	184427021	0.9958	11.9158	PRJNA809958	Taihu, Anhui, China		This study
DBS5	SRR18163002	Target group	Dabieshan	161413345	160793387	0.9962	10.1152	PRJNA809958	Taihu, Anhui, China		This study
DBS6	SRR18163012	Target group	Dabieshan	161605903	161111653	0.9969	9.5085	PRJNA809958	Taihu, Anhui, China		This study
DBS7	SRR18163010	Target group	Dabieshan	166597063	165977524	0.9963	9.5957	PRJNA809958	Taihu, Anhui, China		This study
DBS8	SRR18163009	Target group	Dabieshan	169246685	168873965	0.9978	9.6971	PRJNA809958	Taihu, Anhui, China		This study
DBS9	SRR18163008	Target group	Dabieshan	169246685	168873965	0.9978	9.6135	PRJNA809958	Taihu, Anhui, China		This study
DBS10	SRR18163007	Target group	Dabieshan	228073937	227459927	0.9973	8.7099	PRJNA809958	Taihu, Anhui, China		This study
DBS11	SRR18163005	Target group	Dabieshan	184128674	183602694	0.9971	8.4796	PRJNA809958	Taihu, Anhui, China		This study
DBS12	SRR18163006	Target group	Dabieshan	181046366	180545468	0.9972	8.6248	PRJNA809958	Taihu, Anhui, China		This study
DBS13	SRR18163004	Target group	Dabieshan	166252510	165622039	0.9962	8.4443	PRJNA809958	Taihu, Anhui, China		This study
DBS14	SRR18163014	Target group	Dabieshan	193466155	192896441	0.9971	8.7915	PRJNA809958	Taihu, Anhui, China		This study
DBS15	SRR18163001	Target group	Dabieshan	162914060	162443761	0.9971	8.854	PRJNA809958	Taihu, Anhui, China		This study
DBS16	SRR18163000	Target group	Dabieshan	183131204	182617017	0.9972	9.6152	PRJNA809958	Taihu, Anhui, China		This study
DBS17	SRR18162999	Target group	Dabieshan	162529570	162104896	0.9974	8.5114	PRJNA809958	Taihu, Anhui, China		This study
DBS18	SRR18162998	Target group	Dabieshan	179570146	179174944	0.9978	9.4119	PRJNA809958	Taihu, Anhui, China		This study
DBS19	SRR18162997	Target group	Dabieshan	173251838	172824091	0.9975	9.0761	PRJNA809958	Taihu, Anhui, China		This study
DBS20	SRR18162996	Target group	Dabieshan	174297373	173848283	0.9974	9.1351	PRJNA809958	Taihu, Anhui, China		This study
DBS21	SRR18162994	Target group	Dabieshan	166430719	165869068	0.9966	8.6857	PRJNA809958	Taihu, Anhui, China		This study
DBS22	SRR18162995	Target group	Dabieshan	168581105	168161017	0.9975	8.8425	PRJNA809958	Taihu, Anhui, China		This study
DBS23	SRR18162993	Target group	Dabieshan	168088439	167647301	0.9974	8.8218	PRJNA809958	Taihu, Anhui, China		This study
DBS24	SRR18162992	Target group	Dabieshan	175329175	174846321	0.9972	9.1879	PRJNA809958	Taihu, Anhui, China		This study
DBS25	SRR18163003	Target group	Dabieshan	171955065	171339083	0.9964	8.9825	PRJNA809958	Taihu, Anhui, China		This study
DBS26	SRR18162991	Target group	Dabieshan	170868360	170291077	0.9966	8.9328	PRJNA809958	Taihu, Anhui, China		This study
DBS27	SRR18162990	Target group	Dabieshan	165728472	165163003	0.9966	8.6855	PRJNA809958	Taihu, Anhui, China		This study
DBS28	SRR18162989	Target group	Dabieshan	161759918	161289985	0.9971	8.4845	PRJNA809958	Taihu, Anhui, China		This study
DBS29	SRR18162988	Target group	Dabieshan	160389301	159990732	0.9975	8.4028	PRJNA809958	Taihu, Anhui, China		This study
DBS30	SRR18162987	Target group	Dabieshan	171877230	171460328	0.9976	9.0153	PRJNA809958	Taihu, Anhui, China		This study
AHDBS1	SRR5507194	Target group	Dabieshan	182929268	182334513	0.9967	9.4765	PRJNA379859	Taihu, Anhui, China		Chen et al. 2018
AHDBS2	SRR5507193	Target group	Dabieshan	160901924	157778529	0.9806	7.8305	PRJNA379859	Taihu, Anhui, China		Chen et al. 2018
Chen N, Cai Y, Chen Q, Li R, Wang K, Huang Y, Hu S, Huang S, Zhang H, Zheng Z, Song W, Ma Z, Ma Y, Dang R, Zhang Z, Xu L, Jia Y, Liu S, Yue X, Deng W, Zhang X, Sun Z, Lan X, Han J, Chen H, Bradley DG, Jiang Y, Lei C. Whole-genome resequencing reveals world-wide ancestry and adaptive introgression events of domesticated cattle in East Asia. Nat Commun. 2018;9(1):2337, https://doi.org/10.1038/s4146…

## Sheet: Sheet2
Table S2. List of additional cattle samples for analysis of genetic background in Dabieshan cattle.
Sample ID	Accession number	Breed	Group	Total reads	Mapped reads	Mapping rate	Mean depth	BioProject	Sample origin place	reference
JXGF1	SRR5507286	Guangfeng	Chinese indicine	182463534	182007599	0.9975	9.464	PRJNA379859	Guangfeng, Shangrao, Jiangxi, China	Chen et al. 2018
JXGF2	SRR5507285	Guangfeng	Chinese indicine	195636093	195213746	0.9978	10.1448	PRJNA379859	Guangfeng, Shangrao, Jiangxi, China	Chen et al. 2018
JXGF3	SRR5507284	Guangfeng	Chinese indicine	179330141	178814127	0.9971	9.3126	PRJNA379859	Guangfeng, Shangrao, Jiangxi, China	Chen et al. 2018
JXGF4	SRR5507283	Guangfeng	Chinese indicine	219663910	219143615	0.9976	11.4533	PRJNA379859	Guangfeng, Shangrao, Jiangxi, China	Chen et al. 2018
JXJA1	SRR5507282	Ji'an	Chinese indicine	210698410	210201319	0.9976	10.9441	PRJNA379859	Ji’an, Jiangxi, China	Chen et al. 2018
JXJA2	SRR5507281	Ji'an	Chinese indicine	186849322	186211568	0.9966	9.7093	PRJNA379859	Ji’an, Jiangxi, China	Chen et al. 2018
JXJA3	SRR5507280	Ji'an	Chinese indicine	202119081	201611042	0.9975	10.5123	PRJNA379859	Ji’an, Jiangxi, China	Chen et al. 2018
JXJA4	SRR5507279	Ji'an	Chinese indicine	217703296	217188171	0.9976	11.3836	PRJNA379859	Ji’an, Jiangxi, China	Chen et al. 2018
HN12	SRR5507190	Leiqiong	Chinese indicine	219526027	217652138	0.9915	11.1222	PRJNA379859	Leizhou, Guangdong,China	Chen et al. 2018
HN5	SRR5507189	Leiqiong	Chinese indicine	227168510	225234749	0.9915	11.5007	PRJNA379859	Leizhou, Guangdong,China	Chen et al. 2018
LZ15	SRR5507188	Leiqiong	Chinese indicine	208719494	207367555	0.9935	10.6481	PRJNA379859	Leizhou, Guangdong,China	Chen et al. 2018
WN10	SRR6024573,SRR5507199	Wannan	Chinese indicine	453240314	443641290	0.9788	22.9631	PRJNA379859	Jixi, Anhui, China	Chen et al. 2018
WN11	SRR6024574,SRR5507198	Wannan	Chinese indicine	453327732	448362891	0.989	23.1603	PRJNA379859	Jixi, Anhui, China	Chen et al. 2018
WN4	SRR5507197	Wannan	Chinese indicine	189321051	187411280	0.9899	9.6483	PRJNA379859	Jixi, Anhui, China	Chen et al. 2018
WN8	SRR5507196	Wannan	Chinese indicine	203146450	201321637	0.991	10.1569	PRJNA379859	Jixi, Anhui, China	Chen et al. 2018
WN9	SRR5507195	Wannan	Chinese indicine	229615463	228096174	0.9934	11.7816	PRJNA379859	Jixi, Anhui, China	Chen et al. 2018
Thar1	SRR6936538	Tharparkar	Indian indicine	321541454	319079641	0.9923	16.5496	PRJNA379859	Tharparkar, Sindh, Pakistan	Chen et al. 2018
Sha3b	SRR6936540	Sahiwal	Indian indicine	409173118	407345645	0.9955	20.9563	PRJNA379859	Sahiwal, Punjab, Pakistan	Chen et al. 2018
Har03	SRR6936539	Hariana	Indian indicine	699947032	696290913	0.9948	34.7311	PRJNA379859	Gurgaon, Haryana, India	Chen et al. 2018
SRR2016762	SRR2016762	Nelore	Indian indicine	313024104	308767402	0.9864	10.0582	PRJNA277147	Nelore, Andhra, India	Bickhart et al. 2016
SRR2016752	SRR2016752	Gir	Indian indicine	370454554	368128472	0.9937	12.749	PRJNA277147	Amblash, Gujarat, India	Bickhart et al. 2016
SRR2016754	SRR2016754	Gir	Indian indicine	287091335	285687457	0.9951	9.7792	PRJNA277147	Amblash, Gujarat, India	Bickhart et al. 2016
zebu_ypr115	SRR6423815,SRR6423816	Indian	Indian indicine	282445990	281243304	0.9957	9.6118	PRJNA422979	Indian (unknow)	Bickhart et al. 2016
Brahman05	SRS1603289	Brahman	Indian indicine	267565245	266316604	0.9953	13.1544	PRJNA324822	Brahman, West Bengal, India	Heaton et al. 2016
Brahman06	SRS1603288	Brahman	Indian indicine	307245910	306052029	0.9961	15.3031	PRJNA324822	Brahman, West Bengal, India	Heaton et al. 2016
Brahman07	SRS1603286	Brahman	Indian indicine	272446658	271436987	0.9963	13.2469	PRJNA324822	Brahman, West Bengal, India	Heaton et al. 2016
Brahman08	SRS1603285	Brahman	Indian indicine	297691361	296887649	0.9973	14.1265	PRJNA324822	Brahman, West Bengal, India	Heaton et al. 2016
SRR934415	SRR934395	Hanwoo	East Asian taurine	370355853	369782167	0.9985	12.992	PRJNA210519	Chuncheon, Kangwon-do, Korea	Shin et al. 2014
SRR934417	SRR934397	Hanwoo	East Asian taurine	365464041	364795675	0.9982	12.7709	PRJNA210519	Chuncheon, Kangwon-do, Korea	Shin et al. 2014
SRR934418	SRR934398	Hanwoo	East Asian taurine	381313357	380607742	0.9981	13.2806	PRJNA210519	Chuncheon, Kangwon-do, Korea	Shin et al. 2014
SRR934419	SRR934400	Hanwoo	East Asian taurine	358147369	357508929	0.9982	12.5668	PRJNA210519	Chuncheon, Kangwon-do, Korea	Shin et al. 2014
SRR934432	SRR934401	Hanwoo	East Asian taurine	386376398	385743023	0.9984	13.5425	PRJNA210519	Chuncheon, Kangwon-do, Korea	Shin et al. 2014
SRR934433	SRR934415	Hanwoo	East Asian taurine	351124039	347994230	0.9911	12.2428	PRJNA210519	Chuncheon, Kangwon-do, Korea	Shin et al. 2014
SRR934435	SRR934417	Hanwoo	East Asian taurine	325220510	324575681	0.998	11.4713	PRJNA210519	Chuncheon, Kangwon-do, Korea	Shin et al. 2014
SRR934395	SRR934418	Hanwoo	East Asian taurine	273716378	272962351	0.9972	9.6278	PRJNA210523	Chuncheon, Kangwon-do, Korea	Shin et al. 2014
SRR934397	SRR934419	Hanwoo	East Asian taurine	238326301	237789311	0.9977	8.3728	PRJNA210523	Chuncheon, Kangwon-do, Korea	Shin et al. 2014
SRR934398	SRR934432	Hanwoo	East Asian taurine	294290728	293215215	0.9963	10.1025	PRJNA210523	Chuncheon, Kangwon-do, Korea	Shin et al. 2014
SRR934400	SRR934433	Hanwoo	East Asian taurine	352265435	351530784	0.9979	12.0924	PRJNA210523	Chuncheon, Kangwon-do, Korea	Shin et al. 2014
SRR934401	SRR934434	Hanwoo	East Asian taurine	382961877	382158182	0.9979	13.3862	PRJNA210523	Chuncheon, Kangwon-do, Korea	Shin et al. 2014
SRR934434	SRR934435	Hanwoo	East Asian taurine	356245427	355739052	0.9986	12.5103	PRJNA210519	Chuncheon, Kangwon-do, Korea	Shin et al. 2014
SRR934436	SRR934436	Hanwoo	East Asian taurine	321963462	321522330	0.9986	11.3457	PRJNA210519	Chuncheon, Kangwon-do, Korea	Shin et al. 2014
SRR934437	SRR934437	Hanwoo	East Asian taurine	335261769	334684078	0.9983	11.8099	PRJNA210519	Chuncheon, Kangwon-do, Korea	Shin et al. 2014
SRR1343172	SRR1343172	Red Angus	European taurine	398660006	393104957	0.9986	12.5372	PRJNA176557	Aberdeenshire, Scotland, UK	Stothard et al. 2015
SRR1355239	SRR1355239	Red Angus	European taurine	427900138	423813541	0.9954	13.9812	PRJNA176557	Aberdeenshire, Scotland, UK	Stothard et al. 2015
SRR1365103	SRR1365103	Red Angus	European taurine	461821970	455503652	0.9886	15.3652	PRJNA176557	Aberdeenshire, Scotland, UK	Stothard et al. 2015
SRR1365113	SRR1365113	Red Angus	European taurine	415507452	410557450	0.9909	13.751	PRJNA176557	Aberdeenshire, Scotland, UK	Stothard et al. 2015
SRR1525580	SRR1525580	Red Angus	European taurine	263169047	261616814	0.9955	8.9397	PRJNA256210	Aberdeenshire, Scotland, UK	Stothard et al. 2015
SRR1355237	SRR1355237	angus	European taurine	420884117	416745121	0.9954	13.7841	PRJNA176557	Aberdeenshire, Scotland, UK	Stothard et al. 2015
SRR1365129	SRR1365129	angus	European taurine	470595197	465316011	0.9903	15.5042	PRJNA176557	Aberdeenshire, Scotland, UK	Stothard et al. 2015
SRR1365144	SRR1365144	angus	European taurine	467561927	464270419	0.993	16.2735	PRJNA176557	Aberdeenshire, Scotland, UK	Stothard et al. 2015
SRR1425124	SRR1425124	angus	European taurine	470968713	468252768	0.9942	16.442	PRJNA176557	Aberdeenshire, Scotland, UK	Stothard et al. 2015
SRR1346376	SRR1346376	angus	European taurine	365673740	363404761	0.9938	12.663	PRJNA176557	Aberdeenshire, Scotland, UK	Stothard et al. 2015
SRR1348580	SRR1348580	angus	European taurine	345506771	342702609	0.9919	11.7672	PRJNA176557	Aberdeenshire, Scotland, UK	Stothard et al. 2015
SRR1348581	SRR1348581	angus	European taurine	326724595	324023458	0.9917	11.1201	PRJNA176557	Aberdeenshire, Scotland, UK	Stothard et al. 2015
SRR1425145	SRR1425145	angus	European taurine	379212393	376603508	0.9931	13.1501	PRJNA176557	Aberdeenshire, Scotland, UK	Stothard et al. 2015
SRR1425146	SRR1425146	angus	European taurine	344003668	331730546	0.9643	11.6078	PRJNA176557	Aberdeenshire, Scotland, UK	Stothard et al. 2015
SRR1348573	SRR1348573	angus	European taurine	242751598	241771356	0.996	7.9592	PRJNA176557	Aberdeenshire, Scotland, UK	Stothard et al. 2015
SRR1343160	SRR1343160	Hereford	European taurine	299018219	296567630	0.9918	10.4633	PRJNA176557	Hereford, UK	Stothard et al. 2015
SRR1346382	SRR1346382	Hereford	European taurine	319982256	304507724	0.9516	10.7499	PRJNA176557	Hereford, UK	Stothard et al. 2015
SRR1346383	SRR1346383	Hereford	European taurine	309278497	306096695	0.9897	10.7596	PRJNA176557	Hereford, UK	Stothard et al. 2015
SRR1346385	SRR1346385	Hereford	European taurine	327158459	324015097	0.9904	11.3844	PRJNA176557	Hereford, UK	Stothard et al. 2015
SRR1346387	SRR1346387	Hereford	European taurine	337609130	334606471	0.9911	11.8689	PRJNA176557	Hereford, UK	Stothard et al. 2015
SRR1365124	SRR1365124	Hereford	European taurine	427835992	424105905	0.9913	14.9545	PRJNA176557	Hereford, UK	Stothard et al. 2015
SRR1365126	SRR1365126	Hereford	European taurine	453728718	450640019	0.9932	15.7709	PRJNA176557	Hereford, UK	Stothard et al. 2015
SRR1365128	SRR1365128	Hereford	European taurine	435563699	432532804	0.993	15.2037	PRJNA176557	Hereford, UK	Stothard et al. 2015
SRR1365131	SRR1365131	Hereford	European taurine	439540737	436013491	0.992	15.3153	PRJNA176557	Hereford, UK	Stothard et al. 2015
SRR1365137	SRR1365137	Hereford	European taurine	362489204	358675619	0.9895	12.0762	PRJNA176557	Hereford, UK	Stothard et al. 2015
SRR1525617	SRR1525617	Simmental	Eurasian taurine	354436600	352522501	0.9946	11.9769	PRJNA256210	Geneve, Switzerland	Stothard et al. 2015
SRR1525619	SRR1525619	Simmental	Eurasian taurine	322111422	319470677	0.9918	11.0807	PRJNA256210	Geneve, Switzerland	Stothard et al. 2015
SRR1525621	SRR1525621	Simmental	Eurasian taurine	321936554	318923484	0.9906	11.1448	PRJNA256210	Geneve, Switzerland	Stothard et al. 2015
SRR1525700	SRR1525700	Simmental	Eurasian taurine	365816595	363119596	0.9926	12.5916	PRJNA256210	Geneve, Switzerland	Stothard et al. 2015
SRR1525701	SRR1525701	Simmental	Eurasian taurine	372471908	368806260	0.9902	12.4156	PRJNA256210	Geneve, Switzerland	Stothard et al. 2015
SRR1525702	SRR1525702	Simmental	Eurasian taurine	390790199	388246815	0.9935	13.5684	PRJNA256210	Geneve, Switzerland	Stothard et al. 2015
SRR1525703	SRR1525703	Simmental	Eurasian taurine	468232072	441408804	0.9427	15.1731	PRJNA256210	Geneve, Switzerland	Stothard et al. 2015
SRR1525705	SRR1525705	Simmental	Eurasian taurine	396361844	392131706	0.9893	13.682	PRJNA256210	Geneve, Switzerland	Stothard et al. 2015
SRR2016776	SRR2016776	Jersey	Eurasian taurine	330241932	329214943	0.9979	8.9766	PRJNA277147	Channel Island of Jersey, UK	Bickhart et al. 2016
SRR3497161	SRR3497161	Jersey	Eurasian taurine	424246093	423032235	0.9971	15.0897	PRJNA318089	Channel Island of Jersey, UK	Kim et al. 2020
SRR3497162	SRR3497162	Jersey	Eurasian taurine	443254894	442685873	0.9987	15.4775	PRJNA318089	Channel Island of Jersey, UK	Kim et al. 2020
SRR3497451	SRR3497451	Jersey	Eurasian taurine	363376026	362832284	0.9985	12.8873	PRJNA318089	Channel Island of Jersey, UK	Kim et al. 2020
SRR3497462	SRR3497462	Jersey	Eurasian taurine	378363858	377821522	0.9986	13.3914	PRJNA318089	Channel Island of Jersey, UK	Kim et al. 2020
SRR3497464	SRR3497464	Jersey	Eurasian taurine	346664412	346231740	0.9988	12.2981	PRJNA318089	Channel Island of Jersey, UK	Kim et al. 2020
SRR3497465	SRR3497465	Jersey	Eurasian taurine	409140785	408560228	0.9986	14.4031	PRJNA318089	Channel Island of Jersey, UK	Kim et al. 2020
SRR3497466	SRR3497466	Jersey	Eurasian taurine	419980818	419334634	0.9985	14.8049	PRJNA318089	Channel Island of Jersey, UK	Kim et al. 2020
SRR3497467	SRR3497467	Jersey	Eurasian taurine	446048074	445430522	0.9986	15.8299	PRJNA318089	Channel Island of Jersey, UK	Kim et al. 2020
SRR3497611	SRR3497611	Jersey	Eurasian taurine	409830695	408629067	0.9971	13.9821	PRJNA318089	Channel Island of Jersey, UK	Kim et al. 2020
SRR3497613	SRR3497613	Jersey	Eurasian taurine	439347540	438875313	0.9989	15.6802	PRJNA318089	Channel Island of Jersey, UK	Kim et al. 2020
SRR2016567	SRR2016567	Qinchuan	Qinchuan	324580412	323350422	0.9962	11.3256	PRJNA283480	Weinan, Shaanxi, China	Mei et al. 2018
SRR2016570	SRR2016570	Qinchuan	Qinchuan	307674199	305879069	0.9942	11.1637	PRJNA283480	Weinan, Shaanxi, China	Mei et al. 2018
SRR2016573	SRR2016573	Qinchuan	Qinchuan	330183521	328599984	0.9952	8.464	PRJNA283480	Weinan, Shaanxi, China	Mei et al. 2018
SRR2016574	SRR2016574	Qinchuan	Qinchuan	322226821	321662104	0.9982	10.9279	PRJNA283480	Weinan, Shaanxi, China	Mei et al. 2018
SRR2016575	SRR2016575	Qinchuan	Qinchuan	246328911	244790925	0.9938	10.7216	PRJNA283480	Weinan, Shaanxi, China	Mei et al. 2018
SRR2016576	SRR2016576	Qinchuan	Qinchuan	322135825	320692275	0.9955	10.9152	PRJNA283480	Weinan, Shaanxi, China	Mei et al. 2018
SRR2016577	SRR2016577	Qinchuan	Qinchuan	313946283	310917203	0.9904	10.0919	PRJNA283480	Weinan, Shaanxi, China	Mei et al. 2018
SRR2016578	SRR2016578	Qinchuan	Qinchuan	318371807	316426417	0.9939	10.721	PRJNA283480	Weinan, Shaanxi, China	Mei et al. 2018
SRR2016579	SRR2016579	Qinchuan	Qinchuan	299975265	297477421	0.9917	11.3055	PRJNA283480	Weinan, Shaanxi, China	Mei et al. 2018
SRR2016580	SRR2016580	Qinchuan	Qinchuan	315392920	311152867	0.9866	11.2105	PRJNA283480	Weinan, Shaanxi, China	Mei et al. 2018
SRR2016582	SRR2016582	Qinchuan	Qinchuan	341485188	338373388	0.9909	11.0919	PRJNA283480	Weinan, Shaanxi, China	Mei et al. 2018
SRR2016583	SRR2016583	Qinchuan	Qinchuan	324631302	323948883	0.9979	11.2567	PRJNA283480	Weinan, Shaanxi, China	Mei et al. 2018
SRR2016584	SRR2016584	Qinchuan	Qinchuan	320821823	320191399	0.998	10.9881	PRJNA283480	Weinan, Shaanxi, China	Mei et al. 2018
SRR2016585	SRR2016585	Qinchuan	Qinchuan	340092341	338604430	0.9956	10.9074	PRJNA283480	Weinan, Shaanxi, China	Mei et al. 2018
SRR2016586	SRR2016586	Qinchuan	Qinchuan	332222433	331145764	0.9968	10.5274	PRJNA283480	Weinan, Shaanxi, China	Mei et al. 2018
SRR2016587	SRR2016587	Qinchuan	Qinchuan	328602239	324673918	0.988	11.2978	PRJNA283480	Weinan, Shaanxi, China	Mei et al. 2018
SRR2016588	SRR2016588	Qinchuan	Qinchuan	310376699	309853216	0.9983	11.0855	PRJNA283480	Weinan, Shaanxi, China	Mei et al. 2018
SRR2016589	SRR2016589	Qinchuan	Qinchuan	340240300	338600527	0.9952	10.4454	PRJNA283480	Weinan, Shaanxi, China	Mei et al. 2018
SRR2016590	SRR2016590	Qinchuan	Qinchuan	322240035	321000895	0.9962	11.2402	PRJNA283480	Weinan, Shaanxi, China	Mei et al. 2018
SRR2016591	SRR2016591	Qinchuan	Qinchuan	311288282	308624270	0.9914	10.4329	PRJNA283480	Weinan, Shaanxi, China	Mei et al. 2018
SRR2016592	SRR2016592	Qinchuan	Qinchuan	332697193	330788323	0.9943	8.7641	PRJNA283480	Weinan, Shaanxi, China	Mei et al. 2018
SRR2016593	SRR2016593	Qinchuan	Qinchuan	306419659	305158306	0.9959	11.3752	PRJNA283480	Weinan, Shaanxi, China	Mei et al. 2018
SRR2016594	SRR2016594	Qinchuan	Qinchuan	257708474	254976724	0.9894	9.9321	PRJNA283480	Weinan, Shaanxi, China	Mei et al. 2018
SRR2016595	SRR2016595	Qinchuan	Qinchuan	331748957	327794274	0.9881	11.2218	PRJNA283480	Weinan, Shaanxi, China	Mei et al. 2018
SRR2016596	SRR2016596	Qinchuan	Qinchuan	303896771	298789465	0.9832	9.7265	PRJNA283480	Weinan, Shaanxi, China	Mei et al. 2018
SRR2016597	SRR2016597	Qinchuan	Qinchuan	331940477	330477837	0.9956	10.9016	PRJNA283480	Weinan, Shaanxi, China	Mei et al. 2018
SRR2016598	SRR2016598	Qinchuan	Qinchuan	293182299	287632214	0.9811	9.5348	PRJNA283480	Weinan, Shaanxi, China	Mei et al. 2018
SRR2016599	SRR2016599	Qinchuan	Qinchuan	329953491	327325414	0.992	11.4973	PRJNA283480	Weinan, Shaanxi, China	Mei et al. 2018
SRR2016600	SRR2016600	Qinchuan	Qinchuan	282663199	277456761	0.9816	11.3421	PRJNA283480	Weinan, Shaanxi, China	Mei et al. 2018
SRR2016601	SRR2016601	Qinchuan	Qinchuan	335596541	332295167	0.9902	10.4303	PRJNA283480	Weinan, Shaanxi, China	Mei et al. 2018
Note: Chen N, Cai Y, Chen Q, Li R, Wang K, Huang Y, Hu S, Huang S, Zhang H, Zheng Z, Song W, Ma Z, Ma Y, Dang R, Zhang Z, Xu L, Jia Y, Liu S, Yue X, Deng W, Zhang X, Sun Z, Lan X, Han J, Chen H, Bradley DG, Jiang Y, Lei C. Whole-genome resequencing reveals world-wide ancestry and adaptive introgression events of domesticated cattle in East Asia. Nat Commun. 2018;9(1):2337. https://doi.org/10.1038…

## Sheet: Sheet3
Table S3. Distribution of SNPs annotation in cattle breeds (the sample size larger than 5).
Sequence ontology class	Dabieshan	Qinchuan	Chinese indicine	Indian indicine	Hanwoo	Angus	Hereford	Simmental	Jersey
downstream	268140	224065	237665	149279	90712	64730	55072	64925	47171
exonic	321898	265925	278280	174939	111070	82208	69079	81014	58992
exonic;splicing	84	67	76	43	37	27	27	27	19
intergenic	24991494	20755614	22297740	14052359	7776195	5811149	5034816	5785604	4285708
intronic	16116190	13393598	14363898	8829988	4915740	3596797	3124837	3594575	2612712
ncRNA_exonic	4163	3424	3598	2419	1569	1207	916	1091	776
ncRNA_intronic	33407	28600	30615	19099	8243	6976	6256	7110	5005
ncRNA_splicing	8	6	4	4	3	1	1	2	1
splicing	1102	922	917	597	422	296	278	296	229
upstream	245980	201366	216499	136617	83428	61896	52444	61615	44501
upstream;downstream	9268	7515	8126	4845	3157	2259	1914	2108	1610
UTR3	309173	257723	270970	163787	97694	70909	59968	70627	50775
UTR5	106656	85548	92767	56450	34091	25999	21603	25405	18134
UTR5;UTR3	268	215	210	138	90	60	41	65	50
nonsynonymous	120972	101815	102487	66185	45623	34243	28484	33484	24284
stopgain	1274	1076	1044	718	480	367	263	331	250
stoploss	208	160	180	115	75	64	58	57	47
synonymous	192147	156616	167982	103345	61943	45229	38289	44927	32606
unknown	7381	6325	6663	4619	2986	2332	2012	2242	1824
Ts/Tv	2.405	2.375	2.408	2.393	2.35	2.345	2.344	2.345	2.348

## Sheet: Sheet4
Table S4. Summary of genes from θπ in Dabieshan cattle
Chrom	Starting position	Ending position	θπ	Gene
3	54700001	54750000	13.2957	LOC112445998
3	54740001	54790000	13.2957	LOC507055
3	54740001	54790000	13.2957	LOC511531
12	72180001	72230000	13.0271	LOC100337108
12	72180001	72230000	13.0271	LOC112449109
8	4440001	4490000	12.4484	GALNTL6
5	59100001	59150000	12.414	LOC788258
26	50320001	50370000	12.334	TCERG1L
12	70940001	70990000	12.3173	LOC100336232
23	26220001	26270000	12.2962	LOC101903211
23	26220001	26270000	12.2962	LOC104969894
23	26220001	26270000	12.2962	LOC107131258
12	69940001	69990000	12.2269	LOC104973089
12	69940001	69990000	12.2269	LOC784305
12	72040001	72090000	11.7648	LOC100337076
3	54460001	54510000	11.1687	GBP4
3	54420001	54470000	11.1687	LOC781710
1	158000001	158050000	11.0521	GPX5
1	158000001	158050000	11.0521	GPX6
1	158000001	158050000	11.0521	LOC112448270
1	158000001	158050000	11.0521	TRNAA-AGC
1	158000001	158050000	11.0521	TRNAM-CAU
1	158000001	158050000	11.0521	TRNAT-CGU
21	32980001	33030000	11.0375	LOC112443149
21	32980001	33030000	11.0375	LOC112443150
21	32980001	33030000	11.0375	LOC112443250
21	32980001	33030000	11.0375	LOC112443340
6	40001	90000	10.7245	LOC112447203
23	21740001	21790000	10.4201	LOC613394
23	21740001	21790000	10.4201	LOC781635
12	72420001	72470000	10.4138	LOC112449072
27	6880001	6930000	10.3248	LOC112444647
3	54660001	54710000	10.2721	LOC100336669
1	158020001	158070000	10.2626	LOC527195
1	158020001	158070000	10.2626	TRNAF-GAA
1	158020001	158070000	10.2626	TRNAT-UGU
3	54760001	54810000	10.2545	LOC785445
12	72320001	72370000	10.0194	LOC112449075
14	82380001	82430000	9.99779	SLC2A5
12	71960001	72010000	9.99478	TRNAC-GCA
3	54580001	54630000	9.93605	GBP6
3	54580001	54630000	9.93605	LOC112445997
15	44880001	44930000	9.91421	LOC516263
15	44880001	44930000	9.91421	LOC782678
3	54260001	54310000	9.89724	LOC112445996
3	119340001	119390000	9.84643	LOC530175
7	10100001	10150000	9.8036	LOC785898
23	25580001	25630000	9.70489	BOLA-DQA2
23	25580001	25630000	9.70489	BOLA-DQB
7	9960001	10010000	9.65204	LOC112447331
7	9960001	10010000	9.65204	LOC788031
15	79260001	79310000	9.59169	LOC508180
15	79260001	79310000	9.59169	LOC615824
15	79260001	79310000	9.59169	OR8J1
19	48780001	48830000	9.56738	LOC112442687
7	68560001	68610000	9.52475	LOC112447526
7	68560001	68610000	9.52475	TRNAG-CCC
14	40001	90000	9.52339	LOC112449588
14	40001	90000	9.52339	LOC112449589
14	40001	90000	9.52339	LOC112449638
6	20001	70000	9.50868	LOC788476
24	62300001	62350000	9.50031	LOC101906312
19	43260001	43310000	9.48767	LOC112442843
19	43260001	43310000	9.48767	LOC112442850
19	43260001	43310000	9.48767	LOC112442851
19	43260001	43310000	9.48767	LOC112442854
19	43260001	43310000	9.48767	LOC112442855
19	43260001	43310000	9.48767	LOC112442856
19	43260001	43310000	9.48767	LOC112442857
19	43260001	43310000	9.48767	LOC112442861
10	18920001	18970000	9.43083	MYO9A
1	146700001	146750000	9.42964	LOC101902630
1	146700001	146750000	9.42964	LOC101902902
12	72720001	72770000	9.36471	LOC100337390
14	13480001	13530000	9.34216	LOC112449611
12	70780001	70830000	9.30834	LOC523431
7	10080001	10130000	9.29837	LOC100295735
10	93800001	93850000	9.21925	LOC112448582
13	22720001	22770000	9.17652	MLLT10
13	22720001	22770000	9.17652	SKIDA1
7	110180001	110230000	9.14136	WDR36
23	25600001	25650000	9.12575	BOLA-DQA5
7	9980001	10030000	9.09432	LOC100295806
3	54320001	54370000	8.90672	LOC112445995
29	80001	130000	8.86858	LOC516870
13	43300001	43350000	8.86318	LOC112449294
13	43300001	43350000	8.86318	LOC112449296
13	43300001	43350000	8.86318	LOC782061
10	10020001	10070000	8.7976	DMGDH
17	70860001	70910000	8.77365	IGLL1
17	70860001	70910000	8.77365	LOC101906281
17	70860001	70910000	8.77365	LOC112441477
17	70860001	70910000	8.77365	TRNAS-GGA
29	5480001	5530000	8.77269	LOC100337032
5	102860001	102910000	8.76681	LOC112446749
5	102860001	102910000	8.76681	LOC112446750
5	102860001	102910000	8.76681	WC1-8
23	1	50000	8.75994	LOC101906171
23	1	50000	8.75994	LOC112443721
23	1	50000	8.75994	LOC112443722
15	79240001	79290000	8.72701	LOC507377
15	79240001	79290000	8.72701	OR8K1
13	22700001	22750000	8.70122	CASC10
1	8940001	8990000	8.6901	LOC526789
21	59000001	59050000	8.67321	SERPINA6
29	200001	250000	8.65956	LOC101905316
11	26460001	26510000	8.65552	PPM1B
11	26460001	26510000	8.65552	SLC10A6
7	42900001	42950000	8.63889	LOC112447520
7	42900001	42950000	8.63889	LOC522560
7	42900001	42950000	8.63889	LOC787611
7	42900001	42950000	8.63889	LOC788709
15	79100001	79150000	8.58801	LOC519317
15	79100001	79150000	8.58801	LOC528502
15	79100001	79150000	8.58801	LOC782841
15	79100001	79150000	8.58801	LOC782913
1	157980001	158030000	8.58466	TRNAI-UAU
1	157980001	158030000	8.58466	TRNAR-UCG
1	157980001	158030000	8.58466	TRNAT-UGU
14	13700001	13750000	8.57704	LOC101907803
28	16520001	16570000	8.56272	CDK1
15	79160001	79210000	8.51844	LOC112441588
15	79160001	79210000	8.51844	LOC528577
15	79160001	79210000	8.51844	LOC785944
9	104500001	104550000	8.491	LOC112448149
7	100001	150000	8.48103	LOC101907627
13	69740001	69790000	8.47382	LOC101907320
13	69740001	69790000	8.47382	LOC112449431
13	69740001	69790000	8.47382	LOC112449434
13	69740001	69790000	8.47382	TOP1
12	71500001	71550000	8.40467	LOC107131218
20	51200001	51250000	8.37539	CDH12
8	50840001	50890000	8.3689	TRPM6
6	113020001	113070000	8.34789	LOC107132586
6	113020001	113070000	8.34789	LOC532207
7	17360001	17410000	8.3464	LOC100337044
7	17360001	17410000	8.3464	LOC112447355
21	69840001	69890000	8.34334	LOC112443194
10	80900001	80950000	8.28185	DCAF5
6	80001	130000	8.26787	APELA
8	300001	350000	8.25179	MFSD14B
8	7280001	7330000	8.232	ADAM21
8	7280001	7330000	8.232	LOC112447767
6	112220001	112270000	8.22282	LOC112447131
26	42420001	42470000	8.19179	DMBT1
13	69720001	69770000	8.18582	LOC112449423
19	43240001	43290000	8.17819	LOC112442845
19	43240001	43290000	8.17819	LOC112442848
19	43240001	43290000	8.17819	LOC112442849
7	10120001	10170000	8.16958	LOC512488
7	10120001	10170000	8.16958	LOC786840
26	50340001	50390000	8.16029	LOC112444506
13	69640001	69690000	8.15903	LOC112449380
7	50900001	50950000	8.15133	LOC112447552
18	60200001	60250000	8.13824	LOC101905616
18	60200001	60250000	8.13824	LOC112442368
10	58900001	58950000	8.12018	DMXL2
10	58900001	58950000	8.12018	GLDN
10	58900001	58950000	8.12018	LOC112448481
3	119380001	119430000	8.11782	CSF2RA
7	80001	130000	8.11683	LOC112447312
13	22920001	22970000	8.11522	DNAJC1
7	50660001	50710000	8.10829	DNAJC18
7	50660001	50710000	8.10829	MZB1
7	50660001	50710000	8.10829	PROB1
7	50660001	50710000	8.10829	SLC23A1
7	50660001	50710000	8.10829	SPATA24
9	39420001	39470000	8.10406	AMD1
7	10780001	10830000	8.10162	LOC100299045
7	10780001	10830000	8.10162	LOC100300051
16	8900001	8950000	8.07269	LOC789494
12	87200001	87250000	8.07107	LOC112449111
9	41700001	41750000	8.05359	AFG1L
4	7740001	7790000	8.04628	CLDN12
4	7740001	7790000	8.04628	SUN3
10	10000001	10050000	8.03997	ARSB
19	63440001	63490000	8.03473	LOC112442745
23	600001	650000	8.0244	KHDRBS2
10	37120001	37170000	8.02284	MGA
19	27520001	27570000	8.00868	CYB5D1
19	27520001	27570000	8.00868	DNAH2
19	27520001	27570000	8.00868	KDM6B
19	27520001	27570000	8.00868	NAA38
19	27520001	27570000	8.00868	TMEM88
13	69760001	69810000	8.00485	PLCG1
7	52740001	52790000	8.00036	ARAP3
7	52740001	52790000	8.00036	FCHSD1
1	158180001	158230000	7.99316	TXLNA
7	52720001	52770000	7.97994	HDAC3
7	52720001	52770000	7.97994	RELL2
16	57000001	57050000	7.97787	TNR
16	57000001	57050000	7.97787	TRNAY-GUA
7	52700001	52750000	7.96623	DIAPH1
13	43440001	43490000	7.95472	LOC112441538
13	43440001	43490000	7.95472	LOC112449293
13	43440001	43490000	7.95472	LOC785762
7	50800001	50850000	7.94503	UBE2D2
3	92240001	92290000	7.94322	HSPB11
3	92240001	92290000	7.94322	LRRC42
23	16560001	16610000	7.93332	CNPY3
23	16560001	16610000	7.93332	GNMT
23	16560001	16610000	7.93332	LOC112443696
3	17380001	17430000	7.93267	LOC112445861
7	50880001	50930000	7.9273	CXXC5
12	86920001	86970000	7.92505	RASA3
5	58020001	58070000	7.92377	LOC782430
13	43320001	43370000	7.88845	LOC112449295
18	63120001	63170000	7.88747	LOC112441494
7	50640001	50690000	7.88266	PAIP2
15	51460001	51510000	7.88046	LOC112441637
15	51460001	51510000	7.88046	LOC407148
15	51460001	51510000	7.88046	LOC507756
15	79300001	79350000	7.87349	LOC785406
27	6960001	7010000	7.86261	DEFB
17	71120001	71170000	7.85656	LOC100847119
17	71120001	71170000	7.85656	LOC112441982
17	71120001	71170000	7.85656	LOC112442062
17	71120001	71170000	7.85656	LOC112442088
7	50180001	50230000	7.85377	CTNNA1
7	50180001	50230000	7.85377	LRRTM2
7	49740001	49790000	7.84313	FAM53C
7	49740001	49790000	7.84313	KDM3B
23	30200001	30250000	7.83536	LOC112441537
23	30200001	30250000	7.83536	LOC112443761
23	30200001	30250000	7.83536	TRNAI-UAU
23	30200001	30250000	7.83536	TRNAK-UUU
23	30200001	30250000	7.83536	TRNAR-UCG
23	30200001	30250000	7.83536	TRNAT-UGU
7	49880001	49930000	7.82882	ETF1
7	49880001	49930000	7.82882	HSPA9
7	49880001	49930000	7.82882	LOC112447603
5	46480001	46530000	7.8252	CAND1
5	46480001	46530000	7.8252	LOC100848339
19	57780001	57830000	7.81506	SDK2
17	62200001	62250000	7.81064	ADAM1A
17	62200001	62250000	7.81064	LOC112442047
17	62200001	62250000	7.81064	LOC112442048
5	65520001	65570000	7.80889	CHPT1
5	65520001	65570000	7.80889	SYCP3
7	50740001	50790000	7.79886	TMEM173
16	7020001	7070000	7.7803	LOC107133219
16	7020001	7070000	7.7803	LOC112441779
16	7020001	7070000	7.7803	LOC112441816
5	28280001	28330000	7.77472	SLC4A8
7	50560001	50610000	7.77093	LOC112447601
7	50560001	50610000	7.77093	MATR3
7	50560001	50610000	7.77093	SNHG4
7	49760001	49810000	7.76985	REEP2
5	65500001	65550000	7.76735	MYBPC1
19	26420001	26470000	7.76683	CAMTA2
19	26420001	26470000	7.76683	ENO3
19	26420001	26470000	7.76683	GP1BA
19	26420001	26470000	7.76683	LOC100848357
19	26420001	26470000	7.76683	PFN1
19	26420001	26470000	7.76683	RNF167
19	26420001	26470000	7.76683	SLC25A11
19	26420001	26470000	7.76683	SPAG7
7	49720001	49770000	7.76459	CDC25C
7	49720001	49770000	7.76459	MIR2459
7	49720001	49770000	7.76459	SLBP2
7	9920001	9970000	7.75703	LOC101903003
26	23260001	23310000	7.75649	ARL3
26	23260001	23310000	7.75649	LOC104975974
26	23260001	23310000	7.75649	TRIM8
29	20240001	20290000	7.75259	LUZP2
17	71140001	71190000	7.74393	LOC100297192
19	26920001	26970000	7.74254	ACADVL
19	26920001	26970000	7.74254	CLDN7
19	26920001	26970000	7.74254	CTDNEP1
19	26920001	26970000	7.74254	DLG4
19	26920001	26970000	7.74254	DVL2
19	26920001	26970000	7.74254	ELP5
19	26920001	26970000	7.74254	GABARAP
19	26920001	26970000	7.74254	MIR324
19	26920001	26970000	7.74254	PHF23
19	27400001	27450000	7.74041	EFNB3
19	27400001	27450000	7.74041	WRAP53
7	50920001	50970000	7.73464	PSD2
15	83940001	83990000	7.7336	LOC112441593
8	23160001	23210000	7.72592	IFNB3
8	23160001	23210000	7.72592	LOC100848709
8	23160001	23210000	7.72592	LOC112441480
8	23160001	23210000	7.72592	LOC112447877
8	23160001	23210000	7.72592	LOC112447878
8	23160001	23210000	7.72592	LOC112447879
8	23160001	23210000	7.72592	LOC616977
21	22440001	22490000	7.70019	ALPK3
21	22440001	22490000	7.70019	ZNF592
21	22380001	22430000	7.68107	LOC112443242
11	73240001	73290000	7.67992	HADHA
11	73240001	73290000	7.67992	HADHB
5	65540001	65590000	7.67939	GNPTAB
18	44620001	44670000	7.67777	LSM14A
9	38920001	38970000	7.67359	LOC784866
9	38920001	38970000	7.67359	MIR6536-1
9	38920001	38970000	7.67359	MIR6536-2
9	38920001	38970000	7.67359	REV3L
3	34180001	34230000	7.66755	KIAA1324
3	34180001	34230000	7.66755	SARS
13	23420001	23470000	7.66625	BMI1
13	23420001	23470000	7.66625	COMMD3
13	23420001	23470000	7.66625	SPAG6
7	51540001	51590000	7.66452	HBEGF
7	51540001	51590000	7.66452	LOC107132639
7	51540001	51590000	7.66452	SLC4A9
10	58720001	58770000	7.66391	LOC112448482
20	66700001	66750000	7.6635	UBE2QL1
25	42260001	42310000	7.65811	LOC516442
17	70720001	70770000	7.6532	LOC112442063
17	70720001	70770000	7.6532	LOC112442065
17	70720001	70770000	7.6532	LOC504730
9	87100001	87150000	7.65225	LOC101903261
9	87100001	87150000	7.65225	LOC785982
9	87100001	87150000	7.65225	RAET1L
7	50400001	50450000	7.64889	SIL1
1	97980001	98030000	7.64432	MECOM
19	28180001	28230000	7.6443	MYH10
16	39800001	39850000	7.63874	DNM3
7	50860001	50910000	7.63741	LOC112447430
29	10400001	10450000	7.63518	DLG2
7	49780001	49830000	7.63518	EGR1
7	49780001	49830000	7.63518	LOC101904825
2	125740001	125790000	7.62668	AHDC1
15	47220001	47270000	7.61174	OR52E6
15	47220001	47270000	7.61174	OR52N2
9	41540001	41590000	7.60294	FOXO3
9	41540001	41590000	7.60294	LOC112448043
10	25740001	25790000	7.60185	CHD8
10	25740001	25790000	7.60185	LOC104973099
10	25740001	25790000	7.60185	LOC112448609
10	25740001	25790000	7.60185	LOC112448610
10	25740001	25790000	7.60185	SUPT16H
29	27420001	27470000	7.60084	LOC787694
12	31860001	31910000	7.5915	PAN3
11	82980001	83030000	7.5911	LOC112441484
11	82980001	83030000	7.5911	LOC112448823
11	82980001	83030000	7.5911	LOC112448824
11	82980001	83030000	7.5911	NBAS
28	2400001	2450000	7.59008	LOC112444731
28	2400001	2450000	7.59008	PGBD5
8	7260001	7310000	7.58522	LOC782699
19	28160001	28210000	7.58324	LOC112442832
19	26400001	26450000	7.58014	INCA1
19	26400001	26450000	7.58014	KIF1C
12	32300001	32350000	7.57879	LNX2
12	32300001	32350000	7.57879	POLR1D
26	38320001	38370000	7.57689	LOC112444480
29	280001	330000	7.57683	LOC104970173
29	280001	330000	7.57683	LOC789688
9	104460001	104510000	7.57483	TRNAY-GUA
10	25760001	25810000	7.57364	RPGRIP1
3	53200001	53250000	7.57243	ZNF326
3	34320001	34370000	7.5718	WDR47
5	66020001	66070000	7.57031	PARPBP
5	66020001	66070000	7.57031	PMCH
19	27540001	27590000	7.56484	CHD3
19	27540001	27590000	7.56484	LOC112442833
19	27540001	27590000	7.56484	RNF227
1	95460001	95510000	7.56282	FNDC3B
6	102060001	102110000	7.56142	KLHL8
3	34380001	34430000	7.55911	CLCC1
19	27360001	27410000	7.55485	ATP1B2
19	27360001	27410000	7.55485	TP53
10	36980001	37030000	7.55396	LOC112448654
5	55960001	56010000	7.55152	ARHGAP9
5	55960001	56010000	7.55152	DDIT3
5	55960001	56010000	7.55152	GLI1
5	55960001	56010000	7.55152	INHBE
5	55960001	56010000	7.55152	MARS
5	55960001	56010000	7.55152	MIR2430
7	51280001	51330000	7.5488	IGIP
7	51280001	51330000	7.5488	PURA
5	112280001	112330000	7.54867	EP300
5	112280001	112330000	7.54867	LOC112446777
5	112280001	112330000	7.54867	MIR1281
10	37140001	37190000	7.54784	MAPKBP1
7	60400001	60450000	7.54214	SH3TC2
7	51660001	51710000	7.54039	ANKHD1
26	51980001	52030000	7.53994	PWWP2B
2	52160001	52210000	7.53962	LOC101904069
2	52160001	52210000	7.53962	LOC613677
2	52160001	52210000	7.53962	ZEB2
1	157960001	158010000	7.53841	TRNAK-UUU
1	157960001	158010000	7.53841	ZBED9
5	28260001	28310000	7.53657	LOC112446848
11	95120001	95170000	7.53434	LHX2
19	37880001	37930000	7.53216	HOXB3
19	37880001	37930000	7.53216	HOXB4
19	37880001	37930000	7.53216	HOXB5
19	37880001	37930000	7.53216	HOXB6
19	37880001	37930000	7.53216	HOXB7
19	37880001	37930000	7.53216	HOXB8
19	37880001	37930000	7.53216	MIR10A
19	37880001	37930000	7.53216	MIR2886
11	95100001	95150000	7.53171	LOC112448886
10	59160001	59210000	7.53044	LOC104973172
21	22400001	22450000	7.5303	MIR2364
1	95440001	95490000	7.53016	LOC101904810
1	157940001	157990000	7.52958	TRNAQ-UUG
7	51260001	51310000	7.52871	LOC104969190
3	34300001	34350000	7.52528	TAF13
7	18740001	18790000	7.52466	LOC112447361
18	35960001	36010000	7.51906	CDH3
21	43500001	43550000	7.519	NPAS3
4	76740001	76790000	7.51857	LOC112446406
4	76740001	76790000	7.51857	OGDH
4	76740001	76790000	7.51857	ZMIZ2
7	50680001	50730000	7.51701	ECSCR
10	23200001	23250000	7.51545	LOC100298434
10	23200001	23250000	7.51545	LOC100336282
10	23200001	23250000	7.51545	LOC107132831
10	23200001	23250000	7.51545	LOC407205
17	70700001	70750000	7.51438	LOC112442072
17	70700001	70750000	7.51438	LOC511353
7	51560001	51610000	7.51234	LOC112447436
7	51560001	51610000	7.51234	TRNAE-CUC
5	55980001	56030000	7.5105	INHBC
11	73220001	73270000	7.50918	ADGRF3
12	35460001	35510000	7.50806	LOC107132993
12	35460001	35510000	7.50806	LOC112449059
12	35460001	35510000	7.50806	MICU2
3	100980001	101030000	7.50601	LOC112446022
3	100980001	101030000	7.50601	ZSWIM5
17	70680001	70730000	7.50558	LOC112441499
17	70680001	70730000	7.50558	LOC511354
5	30760001	30810000	7.50524	KMT2D
5	30760001	30810000	7.50524	MIR2426
5	30760001	30810000	7.50524	PRKAG1
11	72540001	72590000	7.50403	AGBL5
11	72540001	72590000	7.50403	EMILIN1
11	72540001	72590000	7.50403	KHK
11	72540001	72590000	7.50403	OST4
11	72540001	72590000	7.50403	TRNAA-AGC
11	72540001	72590000	7.50403	TRNAY-GUA
22	30100001	30150000	7.49714	FOXP1
22	30100001	30150000	7.49714	MIR1284
17	52220001	52270000	7.49529	KMT5A
17	52220001	52270000	7.49529	LOC112442037
17	52220001	52270000	7.49529	SBNO1
19	27020001	27070000	7.49376	ACAP1
19	27020001	27070000	7.49376	EIF5A
19	27020001	27070000	7.49376	GPS2
19	27020001	27070000	7.49376	KCTD11
19	27020001	27070000	7.49376	NEURL4
19	27020001	27070000	7.49376	TMEM95
19	27020001	27070000	7.49376	TNK1
5	57180001	57230000	7.49329	ERBB3
5	57180001	57230000	7.49329	ESYT1
5	57180001	57230000	7.49329	LOC101903253
5	57180001	57230000	7.49329	PA2G4
5	57180001	57230000	7.49329	ZC3H10
9	39460001	39510000	7.49141	CDK19
11	61320001	61370000	7.49095	EHBP1
26	38260001	38310000	7.49044	RAB11FIP2
3	103900001	103950000	7.48998	FOXJ3
19	27300001	27350000	7.48871	CD68
19	27300001	27350000	7.48871	EIF4A1
19	27300001	27350000	7.48871	FXR2
19	27300001	27350000	7.48871	LOC112442805
19	27300001	27350000	7.48871	LOC112442823
19	27300001	27350000	7.48871	LOC112442840
19	27300001	27350000	7.48871	MPDU1
19	27300001	27350000	7.48871	SAT2
19	27300001	27350000	7.48871	SENP3
19	27300001	27350000	7.48871	SHBG
19	27300001	27350000	7.48871	SOX15
10	58680001	58730000	7.48685	SCG3
19	27040001	27090000	7.48669	NLGN2
19	27040001	27090000	7.48669	PLSCR3
19	27040001	27090000	7.48669	TMEM256
1	158040001	158090000	7.48341	ZSCAN23
21	33400001	33450000	7.48102	SIN3A
13	23460001	23510000	7.48091	TRNASTOP-UCA
7	49680001	49730000	7.48018	GFRA3
7	49680001	49730000	7.48018	TRNAE-UUC
5	59240001	59290000	7.47991	LOC788357
5	59240001	59290000	7.47991	LOC788372
9	39200001	39250000	7.47726	SLC16A10
7	43860001	43910000	7.47689	APC2
7	43860001	43910000	7.47689	C7H19orf25
7	43860001	43910000	7.47689	PCSK4
7	43860001	43910000	7.47689	REEP6
29	5500001	5550000	7.47646	LOC112444838
29	5500001	5550000	7.47646	LOC530556
19	26900001	26950000	7.47543	LOC112442813
26	38500001	38550000	7.4737	LOC112444511
10	36960001	37010000	7.47282	TYRO3
4	79260001	79310000	7.47205	INHBA
3	93860001	93910000	7.47056	ZCCHC11
3	80480001	80530000	7.46979	JAK1
1	26200001	26250000	7.46787	ROBO1
18	34940001	34990000	7.46701	LRRC36
23	31260001	31310000	7.4649	PRSS16
23	31260001	31310000	7.4649	TRNAI-AAU
23	31260001	31310000	7.4649	TRNAI-AAU
23	31260001	31310000	7.4649	TRNAI-AAU
23	31260001	31310000	7.4649	TRNAI-AAU
23	31260001	31310000	7.4649	TRNAI-AAU
23	31260001	31310000	7.4649	TRNAM-CAU
23	31260001	31310000	7.4649	TRNAM-CAU
23	31260001	31310000	7.4649	TRNAM-CAU
23	31260001	31310000	7.4649	TRNAR-ACG
23	31260001	31310000	7.4649	TRNAR-ACG
23	31260001	31310000	7.4649	TRNAS-GCU
23	31260001	31310000	7.4649	TRNAS-GCU
23	31260001	31310000	7.4649	TRNAS-GCU
23	31260001	31310000	7.4649	TRNAS-GCU
23	31260001	31310000	7.4649	TRNAS-GCU
23	31260001	31310000	7.4649	TRNAS-GCU
23	31260001	31310000	7.4649	TRNAS-GCU
23	31260001	31310000	7.4649	TRNAT-AGU
23	31260001	31310000	7.4649	TRNAV-CAC
23	31260001	31310000	7.4649	TRNAV-CAC
23	31260001	31310000	7.4649	TRNAV-UAC
11	72560001	72610000	7.46309	LOC101906001
11	72560001	72610000	7.46309	MAPRE3
11	72560001	72610000	7.46309	TMEM214
3	52020001	52070000	7.46228	HFM1
3	21320001	21370000	7.4594	HJV
3	21320001	21370000	7.4594	LOC112445953
3	21320001	21370000	7.4594	LOC112446129
3	21320001	21370000	7.4594	LOC112446130
3	21320001	21370000	7.4594	TRNAE-CUC
3	21320001	21370000	7.4594	TRNAG-UCC
3	21320001	21370000	7.4594	TRNAH-GUG
3	21320001	21370000	7.4594	TRNAK-CUU
3	21320001	21370000	7.4594	TRNAN-GUU
15	79120001	79170000	7.45855	LOC514057
15	79120001	79170000	7.45855	LOC614985
19	44280001	44330000	7.45803	FZD2
19	44280001	44330000	7.45803	GPATCH8
3	34280001	34330000	7.45795	LOC112446127
3	34280001	34330000	7.45795	TMEM167B
5	59000001	59050000	7.45763	LOC112446614
5	59000001	59050000	7.45763	LOC788210
5	59000001	59050000	7.45763	LOC788220
5	30740001	30790000	7.45739	RHEBL1
1	82840001	82890000	7.4557	CLCN2
1	82840001	82890000	7.4557	EIF4G1
1	82840001	82890000	7.4557	FAM131A
1	82840001	82890000	7.4557	LOC112448329
1	82840001	82890000	7.4557	PSMD2
19	11100001	11150000	7.45484	MED13
3	53280001	53330000	7.45326	LRRC8D
26	22960001	23010000	7.45246	GBF1
13	22600001	22650000	7.45119	MIR2285D
5	70240001	70290000	7.44967	CRY1
5	70240001	70290000	7.44967	MTERF2
5	70240001	70290000	7.44967	TMEM263
1	52120001	52170000	7.448	BBX
13	23480001	23530000	7.44698	LOC112449267
18	34980001	35030000	7.44588	TPPP3
18	34980001	35030000	7.44588	ZDHHC1
21	22320001	22370000	7.44585	SEC11A
5	56800001	56850000	7.44509	BAZ2A
5	56800001	56850000	7.44509	LOC112446708
5	56800001	56850000	7.44509	RBMS2
16	41280001	41330000	7.44231	VPS13D
3	119320001	119370000	7.4357	LOC615000
26	22500001	22550000	7.43569	FGF8
26	22500001	22550000	7.43569	NPM3
26	22500001	22550000	7.43569	OGA
26	22520001	22570000	7.43539	KCNIP2
26	22740001	22790000	7.43483	ARMH3
26	22740001	22790000	7.43483	HPS6
26	22740001	22790000	7.43483	LDB1
3	54780001	54830000	7.43438	LOC100336443
10	25660001	25710000	7.43402	METTL3
10	25660001	25710000	7.43402	RAB2B
10	25660001	25710000	7.43402	TOX4
7	50720001	50770000	7.43308	SMIM33
19	27740001	27790000	7.4323	ALOXE3
19	27740001	27790000	7.4323	HES7
19	27740001	27790000	7.4323	LOC112442777
19	27740001	27790000	7.4323	PER1
19	27740001	27790000	7.4323	TRNAG-GCC
19	27740001	27790000	7.4323	TRNAK-UUU
19	27740001	27790000	7.4323	TRNAL-UAG
19	27740001	27790000	7.4323	TRNAQ-CUG
19	27740001	27790000	7.4323	TRNAR-UCU
19	27740001	27790000	7.4323	TRNAS-CGA
19	27740001	27790000	7.4323	TRNAT-AGU
3	34260001	34310000	7.43225	C3H1orf194
7	43560001	43610000	7.4298	ABCA7
7	43560001	43610000	7.4298	ARHGAP45
7	43560001	43610000	7.4298	GPX4
7	43560001	43610000	7.4298	POLR2E
7	43560001	43610000	7.4298	SBNO2
9	39320001	39370000	7.42819	GTF3C6
9	39320001	39370000	7.42819	RPF2
1	82940001	82990000	7.4258	ABCF3
1	82940001	82990000	7.4258	AP2M1
1	82940001	82990000	7.4258	DVL3
1	82940001	82990000	7.4258	LOC101907353
1	82940001	82990000	7.4258	VWA5B2
11	73600001	73650000	7.42499	ASXL2
3	101000001	101050000	7.42452	HECTD3
3	101000001	101050000	7.42452	UROD
20	70920001	70970000	7.42249	LOC112443021
3	34040001	34090000	7.41884	SORT1
4	43300001	43350000	7.4127	PHTF2
18	35780001	35830000	7.41268	LOC101907242
18	35780001	35830000	7.41268	SMPD3
16	5780001	5830000	7.41138	LOC112441814
16	5780001	5830000	7.41138	LOC514121
3	34060001	34110000	7.41123	MYBPHL
7	49280001	49330000	7.40786	LOC104969184
4	119840001	119890000	7.40783	LOC112446467
18	34920001	34970000	7.40771	KCTD19
19	27060001	27110000	7.40771	LOC112442746
19	27060001	27110000	7.40771	SPEM1
19	27060001	27110000	7.40771	SPEM2
19	27080001	27130000	7.40766	CHRNB1
19	27080001	27130000	7.40766	FGF11
19	27080001	27130000	7.40766	TMEM102
1	82920001	82970000	7.4075	ALG3
1	82920001	82970000	7.4075	CAMK2N2
1	82920001	82970000	7.4075	ECE2
1	82920001	82970000	7.4075	MIR1224
8	82120001	82170000	7.40657	PTCH1
7	19920001	19970000	7.40289	MAP2K2
7	19920001	19970000	7.40289	ZBTB7A
15	42480001	42530000	7.40286	SBF2
19	27280001	27330000	7.40169	LOC107131516
19	27280001	27330000	7.40169	TNFSF12
19	27280001	27330000	7.40169	TNFSF13
22	56020001	56070000	7.39738	MIR2372
22	56020001	56070000	7.39738	TMCC1
16	19440001	19490000	7.39529	USH2A
15	51440001	51490000	7.39521	LOC618664
7	43540001	43590000	7.39442	CNN2
12	36180001	36230000	7.39221	ZMYM2
15	29100001	29150000	7.3922	KMT2A
15	29100001	29150000	7.3922	LOC101902944
13	22320001	22370000	7.39121	NEBL
17	8460001	8510000	7.39083	IQCM
5	56780001	56830000	7.38972	ATP5F1B
5	56780001	56830000	7.38972	LOC112446861
5	56780001	56830000	7.38972	MIR677
5	56780001	56830000	7.38972	PTGES3
20	41240001	41290000	7.38283	ZFR
17	67720001	67770000	7.38222	TTC28
23	16580001	16630000	7.38108	PEX6
23	16580001	16630000	7.38108	PPP2R5D
7	11800001	11850000	7.38034	C7H19orf57
7	11800001	11850000	7.38034	LOC112447338
7	11800001	11850000	7.38034	MIR181C
7	11800001	11850000	7.38034	MIR181D
7	11800001	11850000	7.38034	MIR23A
7	11800001	11850000	7.38034	MIR24-2
7	11800001	11850000	7.38034	MIR27A
7	11800001	11850000	7.38034	ZSWIM4
11	61520001	61570000	7.38021	OTX1
9	39300001	39350000	7.37806	LOC112448182
1	107040001	107090000	7.37679	IFT80
1	107040001	107090000	7.37679	MIR15B
1	107040001	107090000	7.37679	MIR16B
1	107040001	107090000	7.37679	SMC4
1	107040001	107090000	7.37679	TRIM59
26	38580001	38630000	7.37469	FAM204A
19	36840001	36890000	7.37367	FAM117A
19	36840001	36890000	7.37367	KAT7
19	36840001	36890000	7.37367	LOC101902801
20	2880001	2930000	7.3734	RANBP17
12	31820001	31870000	7.37074	FLT1
23	30280001	30330000	7.36926	LOC112443785
23	30280001	30330000	7.36926	TRNAA-AGC
23	30280001	30330000	7.36926	TRNAF-GAA
23	30280001	30330000	7.36926	TRNAL-AAG
23	30280001	30330000	7.36926	TRNAM-CAU
23	30280001	30330000	7.36926	TRNAT-CGU
23	30280001	30330000	7.36926	TRNAT-UGU
11	73260001	73310000	7.36919	GAREM2
26	22780001	22830000	7.36796	LOC112444554
26	22780001	22830000	7.36796	NOLC1
26	22780001	22830000	7.36796	PPRC1
12	20280001	20330000	7.3679	DLEU7
7	19940001	19990000	7.36738	PIAS4
21	19680001	19730000	7.36646	LOC107131588
21	19680001	19730000	7.36646	LOC512440
21	19680001	19730000	7.36646	LOC522763
26	23240001	23290000	7.36483	SUFU
1	146560001	146610000	7.36206	TDRP
5	30720001	30770000	7.36148	DHH
5	30720001	30770000	7.36148	LMBR1L
8	38740001	38790000	7.36142	KIAA2026
7	52900001	52950000	7.36115	PCDH1
12	34620001	34670000	7.36102	LOC107132991
12	34620001	34670000	7.36102	SACS
7	51680001	51730000	7.36101	EIF4EBP3
7	51680001	51730000	7.36101	SRA1
5	25980001	26030000	7.35976	HOXC4
5	25980001	26030000	7.35976	HOXC5
5	25980001	26030000	7.35976	HOXC6
5	25980001	26030000	7.35976	HOXC8
5	25980001	26030000	7.35976	HOXC9
5	25980001	26030000	7.35976	LOC112446667
5	25980001	26030000	7.35976	MIR615
3	34020001	34070000	7.35826	PSMA5
7	19620001	19670000	7.35761	HDGFL2
7	19620001	19670000	7.35761	LOC101902724
7	19620001	19670000	7.35761	PLIN4
7	19620001	19670000	7.35761	UBXN6
27	1100001	1150000	7.35733	DLGAP2
11	97400001	97450000	7.35717	LMX1B
11	97400001	97450000	7.35717	LOC112448838
19	28200001	28250000	7.35706	LOC112442760
1	77520001	77570000	7.35639	TP63
17	62220001	62270000	7.3537	LOC112442049
17	62220001	62270000	7.3537	MAPKAPK5
10	73820001	73870000	7.35243	HIF1A
10	73820001	73870000	7.35243	LOC107132877
5	112260001	112310000	7.35199	LOC101902207
11	94300001	94350000	7.3489	STRBP
4	68900001	68950000	7.3487	HOXA1
4	68900001	68950000	7.3487	HOXA2
4	68900001	68950000	7.3487	HOXA3
4	68900001	68950000	7.3487	HOXA4
4	68900001	68950000	7.3487	HOXA5
4	68900001	68950000	7.3487	LOC100848443
4	68900001	68950000	7.3487	LOC112446396
7	43380001	43430000	7.34848	AZU1
7	43380001	43430000	7.34848	CFD
7	43380001	43430000	7.34848	ELANE
7	43380001	43430000	7.34848	LOC112447411
7	43380001	43430000	7.34848	LOC112447659
7	43380001	43430000	7.34848	MED16
7	43380001	43430000	7.34848	PLPPR3
7	43380001	43430000	7.34848	PRTN3
4	94320001	94370000	7.34779	COPG2
4	94320001	94370000	7.34779	MARK4
3	16240001	16290000	7.34535	HAX1
3	16240001	16290000	7.34535	LOC112446112
3	16240001	16290000	7.34535	MIR2411
3	16240001	16290000	7.34535	UBAP2L
8	38220001	38270000	7.34472	GLDC
4	80920001	80970000	7.34133	CDK13
4	80920001	80970000	7.34133	LOC112446479
4	80920001	80970000	7.34133	MPLKIP
4	80920001	80970000	7.34133	SUGCT
2	124700001	124750000	7.34132	LOC112443715
2	124700001	124750000	7.34132	YTHDF2
22	44820001	44870000	7.34023	ERC2
7	43400001	43450000	7.33999	LOC112447653
7	43400001	43450000	7.33999	R3HDM4
10	59140001	59190000	7.33941	CYP19A1
18	44740001	44790000	7.33938	GPI
18	44740001	44790000	7.33938	KIAA0355
9	60380001	60430000	7.33897	CASP8AP2
9	60380001	60430000	7.33897	LOC112448210
9	60380001	60430000	7.33897	MDN1
2	125800001	125850000	7.33855	WASF2
3	119600001	119650000	7.33837	LOC112445919
3	119600001	119650000	7.33837	LOC112446047
3	119600001	119650000	7.33837	LOC526047
3	119600001	119650000	7.33837	LOC617467
3	21400001	21450000	7.33704	ANKRD34A
3	21400001	21450000	7.33704	LIX1L
3	21400001	21450000	7.33704	POLR3GL
3	21400001	21450000	7.33704	RBM8A
3	16220001	16270000	7.33571	AQP10
3	16220001	16270000	7.33571	ATP8B2
12	35520001	35570000	7.33533	ZDHHC20
20	37240001	37290000	7.33454	NIPBL
8	22120001	22170000	7.33352	CDKN2A
13	60260001	60310000	7.33009	FAM110A
13	60260001	60310000	7.33009	SLC52A3
10	58640001	58690000	7.32997	LYSMD2
21	17880001	17930000	7.32849	LOC112443212
19	23060001	23110000	7.32832	DPH1
19	23060001	23110000	7.32832	HIC1
19	23060001	23110000	7.32832	MIR132
19	23060001	23110000	7.32832	MIR212
19	23060001	23110000	7.32832	MIR2337
19	23060001	23110000	7.32832	OVCA2
19	23060001	23110000	7.32832	SMG6
8	22080001	22130000	7.32829	CDKN2B
7	51240001	51290000	7.32813	LOC112447581
11	68240001	68290000	7.328	MXD1
11	68240001	68290000	7.328	SNRNP27
12	21460001	21510000	7.32738	NEK5
5	30780001	30830000	7.3223	DDN
3	16540001	16590000	7.31987	GATAD2B
9	41980001	42030000	7.31938	LOC112448045
7	48620001	48670000	7.31919	SPOCK1
9	60340001	60390000	7.31912	BACH2
9	60340001	60390000	7.31912	GJA10
13	23580001	23630000	7.31764	LOC112449268
13	23580001	23630000	7.31764	MIR2285K-2
13	23580001	23630000	7.31764	PIP4K2A
18	35340001	35390000	7.31733	CENPT
18	35340001	35390000	7.31733	EDC4
18	35340001	35390000	7.31733	NRN1L
18	35340001	35390000	7.31733	NUTF2
18	35340001	35390000	7.31733	PSKH1
18	35340001	35390000	7.31733	THAP11
18	35340001	35390000	7.31733	TRNAS-AGA
3	102080001	102130000	7.31677	ARTN
3	102080001	102130000	7.31677	ATP6V0B
3	102080001	102130000	7.31677	DPH2
3	102080001	102130000	7.31677	IPO13
3	102080001	102130000	7.31677	LOC104971821
3	102080001	102130000	7.31677	LOC112446029
3	102080001	102130000	7.31677	ST3GAL3
13	69920001	69970000	7.31638	ZHX3
11	68980001	69030000	7.31548	GALNT14
14	47500001	47550000	7.31512	UTP23
7	43880001	43930000	7.31384	ADAMTSL5
27	34340001	34390000	7.31187	ADAM32
18	19140001	19190000	7.31145	CYLD
26	22980001	23030000	7.31138	NFKB2
26	22980001	23030000	7.31138	PSD
5	44280001	44330000	7.31078	LOC617219
19	26940001	26990000	7.30839	SLC2A4
2	125820001	125870000	7.30553	LOC112443702
1	56760001	56810000	7.30425	LOC112447300
1	56760001	56810000	7.30425	TAGLN3
3	33980001	34030000	7.3042	SYPL2
12	87120001	87170000	7.30232	LOC104970178
7	54160001	54210000	7.30185	ARHGAP26
19	28060001	28110000	7.30145	NDEL1
11	74780001	74830000	7.30032	ITSN2
10	46840001	46890000	7.29991	LOC107132851
10	46840001	46890000	7.29991	RAB8B
10	46840001	46890000	7.29991	RPS27L
14	13520001	13570000	7.2991	LOC112449612
7	49580001	49630000	7.29892	BRD8
7	49580001	49630000	7.29892	CDC23
7	49580001	49630000	7.29892	KIF20A
7	49580001	49630000	7.29892	LOC101902951
7	49580001	49630000	7.29892	NME5
7	52920001	52970000	7.2989	KIAA0141
7	52920001	52970000	7.2989	TRNAC-GCA
10	26000001	26050000	7.29867	ARHGEF40
10	26000001	26050000	7.29867	LOC100300237
10	26000001	26050000	7.29867	LOC104973100
10	26000001	26050000	7.29867	RNASE13
10	26000001	26050000	7.29867	ZNF219
19	46200001	46250000	7.29695	CDC27
5	20220001	20270000	7.29673	TRNAC-ACA
3	95320001	95370000	7.29639	CDKN2C
3	95320001	95370000	7.29639	FAF1
3	95320001	95370000	7.29639	LOC112446015
3	95320001	95370000	7.29639	LOC112446016
7	57500001	57550000	7.29563	POU4F3
2	7940001	7990000	7.29529	GULP1
11	72580001	72630000	7.29459	LOC112448909
5	56720001	56770000	7.29377	NACA
5	56720001	56770000	7.29377	PRIM1
7	43360001	43410000	7.2937	PTBP1
19	26980001	27030000	7.29266	YBX2
7	49300001	49350000	7.29092	LOC107132636
7	49300001	49350000	7.29092	MYOT
7	44520001	44570000	7.29038	AFF4
7	44520001	44570000	7.29038	LOC112447663
7	44520001	44570000	7.29038	ZCCHC10
2	51460001	51510000	7.29003	LOC104971220
4	68840001	68890000	7.28875	HOXA10
4	68840001	68890000	7.28875	HOXA11
4	68840001	68890000	7.28875	HOXA13
4	68840001	68890000	7.28875	HOXA7
4	68840001	68890000	7.28875	HOXA9
4	68840001	68890000	7.28875	LOC104972110
4	68840001	68890000	7.28875	LOC112446394
4	68840001	68890000	7.28875	LOC112446395
4	68840001	68890000	7.28875	MIR196B
15	62520001	62570000	7.28857	ELP4
15	62520001	62570000	7.28857	PAX6
7	18620001	18670000	7.28631	LOC101907552
7	18620001	18670000	7.28631	LOC104969097
7	18620001	18670000	7.28631	SAFB
3	32220001	32270000	7.28619	CEPT1
3	32220001	32270000	7.28619	DENND2D
26	15180001	15230000	7.28448	ASMTL
26	15180001	15230000	7.28448	LOC112444461
26	15180001	15230000	7.28448	LOC112444465
26	15180001	15230000	7.28448	LOC112444532
26	15180001	15230000	7.28448	SLC25A6
3	110200001	110250000	7.28434	KIAA0319L
3	110200001	110250000	7.28434	NCDN
21	58920001	58970000	7.28231	SERPINA10
18	34800001	34850000	7.28215	E2F4
18	34800001	34850000	7.28215	ELMO3
18	34800001	34850000	7.28215	EXOC3L1
18	34800001	34850000	7.28215	FBXL8
18	34800001	34850000	7.28215	HSF4
18	34800001	34850000	7.28215	KIAA0895L
18	34800001	34850000	7.28215	LOC525426
18	34800001	34850000	7.28215	MIR328
18	34800001	34850000	7.28215	NOL3
5	26000001	26050000	7.28132	HOXC10
5	26000001	26050000	7.28132	LOC101907194
5	26000001	26050000	7.28132	MIR196A-2
2	47420001	47470000	7.27907	EPC2
5	99160001	99210000	7.27833	LOC100140174
3	74920001	74970000	7.27757	SRSF11
8	37780001	37830000	7.27468	KDM4C
8	37780001	37830000	7.27468	LOC104969327
5	70060001	70110000	7.27371	RIC8B
10	36560001	36610000	7.27355	INO80
5	57160001	57210000	7.27236	LOC112446711
5	57160001	57210000	7.27236	MYL6
5	57160001	57210000	7.27236	MYL6B
5	57160001	57210000	7.27236	SMARCC2
19	37860001	37910000	7.27231	HOXB9
19	37860001	37910000	7.27231	LOC112442652
19	37860001	37910000	7.27231	MIR196A-1
7	43420001	43470000	7.27172	ARID3A
7	43420001	43470000	7.27172	KISS1R
18	34820001	34870000	7.2666	FHOD1
18	34820001	34870000	7.2666	TMEM208
7	49620001	49670000	7.26494	LOC112447630
3	93900001	93950000	7.26481	PRPF38A
21	22300001	22350000	7.26478	NMB
21	22300001	22350000	7.26478	WDR73
6	68280001	68330000	7.2645	USP46
5	57120001	57170000	7.26351	LOC112446710
5	57120001	57170000	7.26351	RNF41
5	57120001	57170000	7.26351	TRNAS-CGA
10	36940001	36990000	7.26334	RPAP1
13	24580001	24630000	7.26208	KIAA1217
15	49060001	49110000	7.26202	LOC107133471
27	6240001	6290000	7.26079	LOC783012
11	97320001	97370000	7.25524	LOC104973478
16	50700001	50750000	7.25517	CFAP74
16	50700001	50750000	7.25517	GABRD
16	50700001	50750000	7.25517	LOC101902612
3	49060001	49110000	7.25425	ABCD3
28	13800001	13850000	7.25406	FXYD4
28	13800001	13850000	7.25406	HNRNPF
28	13800001	13850000	7.25406	LOC101905963
9	41140001	41190000	7.25389	SESN1
9	41140001	41190000	7.25389	TRNAC-GCA
3	8560001	8610000	7.25379	ITLN2
3	8560001	8610000	7.25379	LOC100336682
5	65860001	65910000	7.25346	NUP37
5	65860001	65910000	7.25346	WASHC3
3	16260001	16310000	7.25186	C3H1orf189
3	16260001	16310000	7.25186	C3H1orf43
2	121340001	121390000	7.25175	LOC112443606
29	48840001	48890000	7.25089	KCNQ1
1	82820001	82870000	7.25042	POLR2H
1	82820001	82870000	7.25042	THPO
20	71960001	72010000	7.25018	LOC524810
8	22160001	22210000	7.24977	MTAP
17	52260001	52310000	7.24968	CDK2AP1
13	57680001	57730000	7.24865	NPEPL1
13	57680001	57730000	7.24865	STX16
3	50200001	50250000	7.24801	CCDC18
3	20740001	20790000	7.24788	H2B
3	20740001	20790000	7.24788	HIST1H2AK
3	20740001	20790000	7.24788	HIST1H2BL
3	20740001	20790000	7.24788	HIST2H2AA4
3	20740001	20790000	7.24788	HIST2H2BF
3	20740001	20790000	7.24788	LOC504599
3	20740001	20790000	7.24788	LOC516742
3	20740001	20790000	7.24788	LOC788077
10	59720001	59770000	7.24672	TRPM7
10	59720001	59770000	7.24672	USP50
2	53040001	53090000	7.24578	ARHGAP15
17	52860001	52910000	7.24525	KNTC1
17	61920001	61970000	7.24487	HECTD4
17	61920001	61970000	7.24487	LOC112442096
3	21420001	21470000	7.24461	ITGA10
3	21420001	21470000	7.24461	LOC789231
3	21420001	21470000	7.24461	PEX11B
2	86040001	86090000	7.24295	HSPD1
2	86040001	86090000	7.24295	HSPE1
2	86040001	86090000	7.24295	MOB4
29	28300001	28350000	7.24294	ROBO3
5	112520001	112570000	7.24097	ACO2
5	112520001	112570000	7.24097	PHF5A
5	112520001	112570000	7.24097	TEF
5	112520001	112570000	7.24097	TOB2
7	60220001	60270000	7.24017	ADRB2
7	60220001	60270000	7.24017	LOC112447452
23	30180001	30230000	7.23833	TRNAA-AGC
23	30180001	30230000	7.23833	TRNAA-UGC
23	30180001	30230000	7.23833	TRNAQ-UUG
23	30180001	30230000	7.23833	TRNAS-GCU
29	50980001	51030000	7.23744	IFITM3
29	50980001	51030000	7.23744	LOC101904625
29	50980001	51030000	7.23744	LOC112444847
2	26640001	26690000	7.23667	CCDC173
2	26640001	26690000	7.23667	PPIG
16	51000001	51050000	7.23513	CDK11B
16	51000001	51050000	7.23513	FNDC10
16	51000001	51050000	7.23513	MIB2
16	51000001	51050000	7.23513	MMP23
7	58020001	58070000	7.235	PPP2R2B
22	50240001	50290000	7.23465	LOC112443549
22	50240001	50290000	7.23465	RBM5
22	50240001	50290000	7.23465	RBM6
3	17360001	17410000	7.23451	LOC100848030
3	17360001	17410000	7.23451	LOC100848441
2	126000001	126050000	7.23386	WDTC1
10	59540001	59590000	7.23347	SPPL2A
4	68860001	68910000	7.23214	HOXA6
23	21720001	21770000	7.2309	LOC100138976
3	50300001	50350000	7.2305	MTF2
3	50300001	50350000	7.2305	TMED5
10	84820001	84870000	7.22968	NUMB
2	114980001	115030000	7.22962	IRS1
2	114980001	115030000	7.22962	RHBDD1
1	157760001	157810000	7.22949	LOC538060
9	43820001	43870000	7.22784	PRDM1
29	48860001	48910000	7.2278	LOC112444897
17	67940001	67990000	7.22778	CHEK2
4	55180001	55230000	7.22723	LOC101907959
17	62240001	62290000	7.22316	LOC101902124
4	94300001	94350000	7.22026	LOC112446420
22	45480001	45530000	7.21983	LOC112443465
28	25040001	25090000	7.21956	CCAR1
28	25040001	25090000	7.21956	LOC112444806
28	25040001	25090000	7.21956	TET1
3	34140001	34190000	7.21879	CELSR2
5	55940001	55990000	7.21875	DCTN2
5	55940001	55990000	7.21875	MBD6
5	55940001	55990000	7.21875	TRNAE-UUC
12	71100001	71150000	7.21874	LOC522174
12	36100001	36150000	7.2176	GJA3
22	50080001	50130000	7.21712	GNAI2
22	50080001	50130000	7.21712	SEMA3B
22	50080001	50130000	7.21712	TRNAE-UUC
5	30640001	30690000	7.21622	TUBA1A
5	30640001	30690000	7.21622	TUBA1C
19	38140001	38190000	7.21605	SKAP1
9	42000001	42050000	7.21571	TRNAL-CAA
19	27560001	27610000	7.21548	KCNAB3
4	102820001	102870000	7.21529	UBN2
1	136880001	136930000	7.21377	ACAD11
1	136880001	136930000	7.21377	UBA5
13	320001	370000	7.21269	LOC101905258
13	320001	370000	7.21269	LOC784898
12	39660001	39710000	7.21217	PCDH9
17	29420001	29470000	7.21141	PGRMC2
8	22060001	22110000	7.21102	LOC101907577
3	34560001	34610000	7.21072	AKNAD1
3	34560001	34610000	7.21072	STXBP3
26	23000001	23050000	7.21037	CUEDC2
26	23000001	23050000	7.21037	FBXL15
11	95400001	95450000	7.20997	NEK6
11	95400001	95450000	7.20997	PSMB7
7	71620001	71670000	7.2099	PWWP2A
7	71620001	71670000	7.2099	TTC1
18	35540001	35590000	7.20946	NFATC3
19	42800001	42850000	7.20891	BECN1
19	42800001	42850000	7.20891	CNTD1
19	42800001	42850000	7.20891	COA3
19	42800001	42850000	7.20891	PSME3
19	42800001	42850000	7.20891	RAMP2
19	42800001	42850000	7.20891	VPS25
19	42800001	42850000	7.20891	WNK4
17	52880001	52930000	7.20874	RSRC2
18	34840001	34890000	7.20864	SLC9A5
3	99680001	99730000	7.20804	FAAH
3	99680001	99730000	7.20804	LOC513210
20	38560001	38610000	7.20703	SPEF2
26	15200001	15250000	7.20684	LGI1
26	15200001	15250000	7.20684	LOC112444489
19	26780001	26830000	7.20648	ALOX12
19	26780001	26830000	7.20648	BCL6B
19	26780001	26830000	7.20648	C19H17orf49
19	26780001	26830000	7.20648	CLEC10A
19	26780001	26830000	7.20648	LOC100848492
19	26780001	26830000	7.20648	LOC107131510
19	26780001	26830000	7.20648	MIR195
19	26780001	26830000	7.20648	MIR497
19	26780001	26830000	7.20648	RNASEK
19	26780001	26830000	7.20648	SLC16A11
19	26780001	26830000	7.20648	SLC16A13
1	95480001	95530000	7.20625	LOC112447728
2	43480001	43530000	7.205	PRPF40A
20	31540001	31590000	7.20448	LOC112443002
20	31540001	31590000	7.20448	LOC112443080
20	31540001	31590000	7.20448	NIM1K
20	31540001	31590000	7.20448	ZNF131
3	21440001	21490000	7.20445	ANKRD35
19	38160001	38210000	7.20355	LOC112442655
8	111980001	112030000	7.20221	MYT1L
3	16500001	16550000	7.20202	DENND4B
3	16500001	16550000	7.20202	LOC112445944
22	55960001	56010000	7.20181	LOC112443556
19	44180001	44230000	7.20092	ITGA2B
18	16440001	16490000	7.20012	ABCC12
5	102000001	102050000	7.19982	WC-7
16	50980001	51030000	7.19923	SLC35E2
14	400001	450000	7.19872	ARHGAP39
14	400001	450000	7.19872	C14H8orf82
14	400001	450000	7.19872	GPT
14	400001	450000	7.19872	LRRC14
14	400001	450000	7.19872	LRRC24
14	400001	450000	7.19872	MFSD3
14	400001	450000	7.19872	PPP1R16A
14	400001	450000	7.19872	RECQL4
19	37900001	37950000	7.19799	HOXB2
19	37900001	37950000	7.19799	LOC100848766
19	37900001	37950000	7.19799	LOC104975073
25	37800001	37850000	7.19587	LMTK2
25	37800001	37850000	7.19587	LOC104975913
19	27760001	27810000	7.19554	VAMP2
2	47500001	47550000	7.19362	LOC112443690
5	89200001	89250000	7.19344	PDE3A

## Sheet: Sheet5
Table S5. Summary of genes from CLR in Dabieshan cattle
Chrom	Starting position	Ending position	CLR	Gene
16	8900001	8950000	7820.83	LOC789494
16	8140001	8190000	6172.53	LOC100848559
16	8140001	8190000	6172.53	LOC112441780
13	22800001	22850000	2232.64	MLLT10
13	22720001	22770000	2184.06	SKIDA1
13	22700001	22750000	2083.51	CASC10
26	38320001	38370000	1807.38	LOC112444480
26	38520001	38570000	1508.27	LOC112444511
13	22920001	22970000	1398.56	DNAJC1
26	38540001	38590000	1314.34	FAM204A
26	38260001	38310000	890.101	RAB11FIP2
10	58900001	58950000	847.055	DMXL2
10	58920001	58970000	847.055	GLDN
10	58900001	58950000	847.055	LOC112448481
18	44740001	44790000	825.372	GPI
18	44740001	44790000	825.372	KIAA0355
3	53300001	53350000	821.151	LRRC8D
3	53240001	53290000	816.981	ZNF326
7	48640001	48690000	808.974	SPOCK1
29	10420001	10470000	785.434	DLG2
20	66700001	66750000	746.487	UBE2QL1
5	65540001	65590000	649.974	CHPT1
5	65540001	65590000	649.974	GNPTAB
5	65500001	65550000	649.974	MYBPC1
5	65540001	65590000	649.974	SYCP3
18	44620001	44670000	633.423	LSM14A
18	56360001	56410000	628.112	IZUMO2
18	56360001	56410000	628.112	LOC104974912
18	56340001	56390000	628.112	ZNF473
18	56320001	56370000	609.767	VRK3
18	44800001	44850000	581.006	PDCD2L
18	44800001	44850000	581.006	UBA2
13	69760001	69810000	559.464	LOC101907320
13	69720001	69770000	559.464	LOC112449423
13	69760001	69810000	559.464	LOC112449431
13	69760001	69810000	559.464	LOC112449434
13	69760001	69810000	559.464	PLCG1
13	69760001	69810000	559.464	TOP1
20	70780001	70830000	551.326	IRX4
20	70820001	70870000	551.326	MRPL36
20	70820001	70870000	551.326	NDUFS6
19	28200001	28250000	543.222	LOC112442760
19	28160001	28210000	543.222	LOC112442832
19	28180001	28230000	543.222	MYH10
22	44740001	44790000	534.13	ERC2
3	98040001	98090000	517.085	LOC107131387
3	98060001	98110000	517.085	LOC112445888
3	98060001	98110000	517.085	SKINT1
3	98060001	98110000	517.085	TRNAR-ACG
16	9700001	9750000	516.543	TRNAK-UUU
3	92260001	92310000	511.342	HSPB11
3	92260001	92310000	511.342	LRRC42
3	92220001	92270000	498.028	LDLRAD1
11	68980001	69030000	450.657	GALNT14
5	65860001	65910000	441.903	NUP37
5	65860001	65910000	441.903	WASHC3
19	28220001	28270000	436.799	CCDC42
3	93180001	93230000	434.465	PODN
3	93200001	93250000	434.465	SCP2
22	56040001	56090000	428.98	MIR2372
22	56060001	56110000	428.98	TMCC1
22	56000001	56050000	414.524	LOC112443536
22	56000001	56050000	414.524	LOC112443556
13	69660001	69710000	410.049	LOC112449380
13	22580001	22630000	406.597	MIR2285D
3	53360001	53410000	399.076	MIR2285K-5
12	32320001	32370000	394.351	LNX2
12	32320001	32370000	394.351	POLR1D
3	92280001	92330000	370.997	DIO1
3	98000001	98050000	368.485	SLC5A9
22	56080001	56130000	351.249	LOC101902219
22	56080001	56130000	351.249	LOC112443498
14	47500001	47550000	344.437	UTP23
21	43520001	43570000	331.369	NPAS3
5	65820001	65870000	328.224	LOC104972477
3	98200001	98250000	325.726	LOC112446018
13	69780001	69830000	325.621	ZHX3
18	44840001	44890000	318.145	WTIP
3	53400001	53450000	317.928	LOC112445993
7	60400001	60450000	315.701	SH3TC2
18	56380001	56430000	314.981	MYH14
11	69020001	69070000	314.351	CAPN13
7	19640001	19690000	314.347	CHAF1A
7	19640001	19690000	314.347	HDGFL2
7	19640001	19690000	314.347	LOC101902724
7	19620001	19670000	314.347	PLIN4
7	19600001	19650000	314.347	PLIN5
7	19640001	19690000	314.347	UBXN6
20	66620001	66670000	309.817	NSUN2
13	22400001	22450000	305.93	C13H10orf113
13	22400001	22450000	305.93	NEBL
1	95460001	95510000	287.474	FNDC3B
1	95440001	95490000	287.474	LOC101904810
5	66020001	66070000	285.092	PARPBP
5	66020001	66070000	285.092	PMCH
2	126100001	126150000	267.64	SLC9A1
2	126080001	126130000	267.64	TRNAE-UUC
21	59020001	59070000	265.866	SERPINA6
14	35600001	35650000	264.8	TRPA1
3	98220001	98270000	259.178	LOC112446157
19	36880001	36930000	253.225	FAM117A
19	36840001	36890000	253.225	KAT7
19	36860001	36910000	253.225	LOC101902801
19	36880001	36930000	253.225	LOC112442794
19	36880001	36930000	253.225	SLC35B1
5	28260001	28310000	248.553	LOC112446848
5	28300001	28350000	248.553	SLC4A8
21	22380001	22430000	245.534	LOC112443242
21	22400001	22450000	245.534	MIR2364
21	22400001	22450000	245.534	ZNF592
4	62900001	62950000	245.513	BMPER
18	56300001	56350000	242.252	LOC112442212
3	34220001	34270000	241.464	KIAA1324
3	34180001	34230000	241.464	SARS
10	59200001	59250000	236.263	LOC104973172
7	110380001	110430000	235.709	CAMK4
18	16460001	16510000	232.121	ABCC12
1	95480001	95530000	231.918	LOC112447728
21	22360001	22410000	225.786	SEC11A
11	74900001	74950000	223.522	FAM228A
11	74900001	74950000	223.522	FAM228B
11	74900001	74950000	223.522	ITSN2
16	50740001	50790000	222.307	CFAP74
16	50720001	50770000	222.307	GABRD
16	50700001	50750000	222.307	LOC101902612
5	20260001	20310000	219.754	TRNAC-ACA
27	6220001	6270000	216.504	LAP
27	6260001	6310000	216.504	LOC112444638
27	6220001	6270000	216.504	LOC112444653
27	6240001	6290000	216.504	LOC783012
27	6220001	6270000	216.504	RN18S1
3	62980001	63030000	215.033	ADGRL2
16	2980001	3030000	213.745	DSTYK
16	2980001	3030000	213.745	TMCC2
2	39560001	39610000	213.416	LOC112442329
10	80920001	80970000	212.996	DCAF5
19	28300001	28350000	210.305	LOC101904013
19	28280001	28330000	210.305	MFSD6L
19	28300001	28350000	210.305	PIK3R6
9	39420001	39470000	203.451	AMD1
13	24680001	24730000	202.598	KIAA1217
3	98080001	98130000	200.858	LOC112445889
16	2900001	2950000	199.602	LOC112441810
16	2900001	2950000	199.602	RBBP5
22	44500001	44550000	198.763	LOC104975557
22	44500001	44550000	198.763	MIR2371
18	56280001	56330000	197.049	SIGLEC11
3	97960001	98010000	197.022	LOC107132336
20	59120001	59170000	191.708	DNAH5
18	35960001	36010000	190.842	CDH3
12	34620001	34670000	189.192	LOC107132991
12	34640001	34690000	189.192	SACS
12	34640001	34690000	189.192	SGCG
28	17900001	17950000	187.875	ARID5B
28	17880001	17930000	187.875	TRNAG-CCC
2	114900001	114950000	187.71	IRS1
2	114900001	114950000	187.71	LOC101902260
2	114860001	114910000	187.71	LOC112443124
2	114860001	114910000	187.71	LOC112443125
5	89200001	89250000	182.767	PDE3A
3	92200001	92250000	181.332	TMEM59
3	97560001	97610000	179.829	AGBL4
13	23580001	23630000	178.72	LOC112449268
13	23580001	23630000	178.72	MIR2285K-2
13	23580001	23630000	178.72	PIP4K2A
1	56760001	56810000	176.949	LOC112447300
1	56760001	56810000	176.949	TAGLN3
1	56800001	56850000	176.949	TMPRSS7
1	136920001	136970000	176.828	ACAD11
1	136900001	136950000	176.828	UBA5
3	92320001	92370000	176.784	YIPF1
11	74940001	74990000	175.871	LOC104973431
11	74940001	74990000	175.871	PFN4
11	74940001	74990000	175.871	TP53I3
3	95300001	95350000	174.434	CDKN2C
3	95300001	95350000	174.434	LOC112446015
3	95300001	95350000	174.434	LOC112446016
21	17840001	17890000	173.598	AGBL1
21	17880001	17930000	173.598	LOC112443212
1	56940001	56990000	173.336	GCSAM
1	56980001	57030000	173.336	SLC9C1
3	80480001	80530000	171.139	JAK1
2	63180001	63230000	167.189	MGAT5
19	49420001	49470000	165.794	LOC104975111
19	49420001	49470000	165.794	LOC112442758
19	49420001	49470000	165.794	PITPNC1
21	58520001	58570000	165.677	ASB2
21	58520001	58570000	165.677	FAM181A
21	58520001	58570000	165.677	LOC104975434
6	102100001	102150000	164.816	KLHL8
3	103700001	103750000	161.671	CCDC30
3	103720001	103770000	161.671	PPCS
3	103720001	103770000	161.671	ZMYND12
22	52800001	52850000	159.839	ALS2CL
22	52820001	52870000	159.839	FAM240A
22	52820001	52870000	159.839	TDGF1
22	52780001	52830000	159.839	TMIE
16	41300001	41350000	158.397	VPS13D
22	24260001	24310000	155.64	CNTN4
22	24300001	24350000	155.64	LOC112443518
22	30160001	30210000	154.74	FOXP1
3	97940001	97990000	153.731	SPATA6
3	97940001	97990000	153.731	TRNAT-AGU
9	39440001	39490000	152.681	CDK19
3	63220001	63270000	152.505	LOC112445881
3	51980001	52030000	152.399	HFM1
7	49280001	49330000	152.095	LOC104969184
12	19000001	19050000	151.416	CAB39L
12	19020001	19070000	151.416	PHF11
12	19020001	19070000	151.416	SETDB2
3	98240001	98290000	150.789	TRABD2B
2	126020001	126070000	150.673	WDTC1
16	67720001	67770000	148.607	PTGS2
7	49300001	49350000	147.33	LOC107132636
7	49300001	49350000	147.33	MYOT
11	60300001	60350000	146.503	LOC104973390
3	80360001	80410000	145.121	TRNAG-GCC
16	28120001	28170000	144.498	DNAH14
11	97320001	97370000	144.468	LOC104973478
11	97300001	97350000	144.468	MVB12B
11	97400001	97450000	144.379	LMX1B
11	97400001	97450000	144.379	LOC112448838
4	63020001	63070000	143.903	MIR1814C
16	28060001	28110000	142.755	LOC785251
21	22300001	22350000	142.122	NMB
21	22300001	22350000	142.122	WDR73
13	24700001	24750000	141.938	LOC112449393
5	28240001	28290000	139.559	SCN8A
15	76940001	76990000	138.451	C15H11orf49
15	76940001	76990000	138.451	LOC112441656
4	80800001	80850000	137.755	SUGCT
2	86040001	86090000	136.935	HSPD1
2	86040001	86090000	136.935	HSPE1
2	86060001	86110000	136.935	MOB4
2	86060001	86110000	136.935	RFTN2
19	28060001	28110000	136.843	NDEL1
12	39660001	39710000	136.686	PCDH9
15	52720001	52770000	136.502	LOC104974269
15	52720001	52770000	136.502	P2RY2
15	52720001	52770000	136.502	P2RY6
9	41600001	41650000	136.409	FOXO3
3	80320001	80370000	134.536	MIR101-1
25	25060001	25110000	133.545	GTF3C1
25	25060001	25110000	133.545	KIAA0556
5	70040001	70090000	130.681	RFX4
5	70080001	70130000	130.681	RIC8B
19	26920001	26970000	129.564	ACADVL
19	26920001	26970000	129.564	CLDN7
19	26920001	26970000	129.564	CTDNEP1
19	26920001	26970000	129.564	DLG4
19	26920001	26970000	129.564	DVL2
19	26920001	26970000	129.564	ELP5
19	26920001	26970000	129.564	GABARAP
19	26900001	26950000	129.564	LOC112442813
19	26920001	26970000	129.564	MIR324
19	26920001	26970000	129.564	PHF23
14	40500001	40550000	129.395	LOC101904449
3	102100001	102150000	128.007	ARTN
3	102080001	102130000	128.007	ATP6V0B
3	102060001	102110000	128.007	B4GALT2
3	102060001	102110000	128.007	CCDC24
3	102080001	102130000	128.007	DPH2
3	102100001	102150000	128.007	IPO13
3	102080001	102130000	128.007	LOC104971821
3	102100001	102150000	128.007	LOC112446029
3	102060001	102110000	128.007	SLC6A9
3	102100001	102150000	128.007	ST3GAL3
5	65100001	65150000	127.25	SLC5A8
6	58500001	58550000	127.049	KLB
6	58500001	58550000	127.049	RFC1
11	104100001	104150000	126.812	AGPAT2
11	104080001	104130000	126.812	EGFL7
11	104100001	104150000	126.812	FAM69B
11	104100001	104150000	126.812	LOC101902839
11	104100001	104150000	126.812	LOC101902895
11	104100001	104150000	126.812	LOC107132967
11	104100001	104150000	126.812	LOC112448923
11	104100001	104150000	126.812	LOC112448928
11	104080001	104130000	126.812	MIR126
5	69700001	69750000	126.617	POLR3B
5	69700001	69750000	126.617	TCP11L2
22	54280001	54330000	126.02	GHRL
22	54280001	54330000	126.02	SEC13
22	54260001	54310000	126.02	TMEM42
22	54260001	54310000	126.02	ZDHHC3
3	51260001	51310000	125.922	BTBD8
1	136860001	136910000	125.899	NPHP3
21	22440001	22490000	124.836	ALPK3
1	79160001	79210000	123.606	LOC100847122
1	79160001	79210000	123.606	LPP
7	49020001	49070000	122.758	KLHL3
1	130660001	130710000	121.925	ESYT3
1	130700001	130750000	121.925	MRAS
14	20320001	20370000	121.423	SNTG1
29	48840001	48890000	119.812	KCNQ1
15	22100001	22150000	119.198	ALG9
15	22080001	22130000	119.198	LOC101906330
15	22080001	22130000	119.198	PPP2R1B
18	50020001	50070000	119.094	C18H19orf54
18	50020001	50070000	119.094	EGLN2
18	50000001	50050000	119.094	ITPKC
18	50020001	50070000	119.094	LOC615697
18	50020001	50070000	119.094	MIA
18	50020001	50070000	119.094	RAB4B
18	50020001	50070000	119.094	SNRPA
9	41560001	41610000	118.956	LOC112448043
13	9020001	9070000	118.362	MACROD2
19	28360001	28410000	117.858	PIK3R5
2	125840001	125890000	117.308	LOC112443702
2	125840001	125890000	117.308	WASF2
11	64480001	64530000	116.841	LOC112448878
16	41140001	41190000	116.382	DHRS3
19	26940001	26990000	116.371	SLC2A4
26	23280001	23330000	115.659	ARL3
26	23280001	23330000	115.659	LOC104975974
26	23280001	23330000	115.659	SFXN2
26	23240001	23290000	115.659	SUFU
26	23260001	23310000	115.659	TRIM8
28	1560001	1610000	114.628	TAF5L
28	1580001	1630000	114.628	URB2
3	64620001	64670000	114.428	LOC112446081
3	92520001	92570000	114.144	GLIS1
22	6820001	6870000	113.69	CMTM7
22	6800001	6850000	113.69	CMTM8
22	6820001	6870000	113.69	TRNAG-UCC
7	19680001	19730000	113.46	SH3GL1
10	36920001	36970000	112.987	ITPKA
10	36940001	36990000	112.987	RPAP1
10	36960001	37010000	112.987	TYRO3
6	68300001	68350000	112.739	USP46
18	10820001	10870000	112.727	COTL1
18	10840001	10890000	112.727	KLHL36
18	10840001	10890000	112.727	LOC104974744
18	10840001	10890000	112.727	USP10
19	44300001	44350000	112.424	FZD2
19	44280001	44330000	112.424	GPATCH8
9	66880001	66930000	112.365	TRNAY-AUA
7	49060001	49110000	112.199	MIR874
20	35780001	35830000	111.68	LOC101906686
19	26420001	26470000	111.142	CAMTA2
19	26420001	26470000	111.142	ENO3
19	26420001	26470000	111.142	GP1BA
19	26400001	26450000	111.142	INCA1
19	26400001	26450000	111.142	KIF1C
19	26420001	26470000	111.142	LOC100848357
19	26420001	26470000	111.142	PFN1
19	26420001	26470000	111.142	RNF167
19	26420001	26470000	111.142	SLC25A11
19	26420001	26470000	111.142	SPAG7
24	61120001	61170000	110.865	LOC112444194
24	61160001	61210000	110.865	PHLPP1
9	65780001	65830000	110.792	THEMIS
9	65780001	65830000	110.792	TRNAC-GCA
20	53740001	53790000	110.192	CDH18
3	16220001	16270000	109.644	AQP10
3	16220001	16270000	109.644	ATP8B2
3	16240001	16290000	109.644	HAX1
3	16240001	16290000	109.644	LOC112446112
3	16240001	16290000	109.644	MIR2411
3	16240001	16290000	109.644	UBAP2L
9	41640001	41690000	109.626	AFG1L
1	6840001	6890000	108.859	BACH1
19	12060001	12110000	108.25	BCAS3
19	26440001	26490000	108.097	C19H17orf107
19	26440001	26490000	108.097	CHRNE
19	26440001	26490000	108.097	MINK1
29	28320001	28370000	107.957	ROBO3
29	28320001	28370000	107.957	ROBO4
19	31020001	31070000	106.769	LOC112442638
19	31040001	31090000	106.769	MYOCD
3	51220001	51270000	106.61	TRNAE-UUC
13	10160001	10210000	106.569	KIF16B
18	49460001	49510000	106.351	FCGBP
18	49480001	49530000	106.351	LOC100140085
18	49480001	49530000	106.351	LOC101905190
18	49480001	49530000	106.351	LOC104974868
18	49480001	49530000	106.351	LOC112442316
18	49480001	49530000	106.351	PSMC4
10	80940001	80990000	106.126	EXD2
10	66520001	66570000	105.922	BMP4
16	63920001	63970000	105.6	DHX9
16	63960001	64010000	105.6	SHCBP1L
18	7320001	7370000	105.396	DYNLRB2
21	6000001	6050000	104.836	ASB7
21	6000001	6050000	104.836	LINS1
21	5960001	6010000	104.836	LOC112443223
10	37140001	37190000	104.814	MAPKBP1
10	37140001	37190000	104.814	MGA
20	35660001	35710000	103.801	LOC104975274
3	95320001	95370000	103.78	FAF1
1	21260001	21310000	102.896	USP25
15	82560001	82610000	102.595	LOC100299686
15	82540001	82590000	102.595	LOC100848982
15	82560001	82610000	102.595	LOC504200
5	36480001	36530000	102.517	TMEM117
7	58960001	59010000	102.316	JAKMIP2
17	18240001	18290000	101.501	LOC100848703
17	18240001	18290000	101.501	RAB33B
6	6200001	6250000	100.888	LOC101906469
6	6200001	6250000	100.888	SYNPO2
19	30580001	30630000	100.432	DNAH9
19	30580001	30630000	100.432	ZNF18
13	10520001	10570000	100.282	SNRPB2
1	45160001	45210000	100.238	ABI3BP
1	45140001	45190000	100.238	ADGRG7
1	45160001	45210000	100.238	TFG
21	58540001	58590000	100.004	CCDC197
1	52420001	52470000	99.4418	BBX
1	86280001	86330000	99.3141	CCDC39
1	156700001	156750000	99.3067	KCNH8
3	51160001	51210000	98	C3H1orf146
3	51160001	51210000	98	GLMN
6	100360001	100410000	97.7776	ARHGAP24
28	2360001	2410000	97.7204	PGBD5
5	32840001	32890000	96.345	LOC112446683
5	32840001	32890000	96.345	LOC112446684
11	20200001	20250000	95.9195	LOC112448758
11	72560001	72610000	95.3246	AGBL5
11	72520001	72570000	95.3246	CGREF1
11	72540001	72590000	95.3246	EMILIN1
11	72540001	72590000	95.3246	KHK
11	72560001	72610000	95.3246	LOC101906001
11	72560001	72610000	95.3246	MAPRE3
11	72560001	72610000	95.3246	OST4
11	72560001	72610000	95.3246	TMEM214
11	72560001	72610000	95.3246	TRNAA-AGC
11	72560001	72610000	95.3246	TRNAY-GUA
3	16540001	16590000	94.8062	GATAD2B
1	102380001	102430000	94.6649	SI
15	82520001	82570000	94.5781	LOC785899
16	6760001	6810000	94.4943	KCNT2
1	114840001	114890000	94.2371	LOC112447741
3	20780001	20830000	94.1486	FCGR1A
3	20740001	20790000	94.1486	H2B
3	20740001	20790000	94.1486	HIST1H2AK
3	20740001	20790000	94.1486	HIST1H2BL
3	20740001	20790000	94.1486	HIST2H2AA4
3	20760001	20810000	94.1486	HIST2H2BF
3	20780001	20830000	94.1486	LOC112445952
3	20760001	20810000	94.1486	LOC504599
3	20760001	20810000	94.1486	LOC516742
3	20760001	20810000	94.1486	LOC788077
3	20780001	20830000	94.1486	LOC788142
16	65040001	65090000	94.0998	COLGALT2
1	26420001	26470000	93.9907	ROBO1
17	53280001	53330000	93.812	BCL7A
17	53280001	53330000	93.812	LOC112442004
17	53280001	53330000	93.812	MLXIP
15	42480001	42530000	93.7719	SBF2
20	23800001	23850000	93.5568	DHX29
20	23800001	23850000	93.5568	MTREX
21	68220001	68270000	93.3092	APOPT1
21	68240001	68290000	93.3092	KLC1
8	800001	850000	92.9931	PALLD
23	7780001	7830000	92.8781	ITPR3
23	7780001	7830000	92.8781	MNF1
11	7800001	7850000	92.6654	LOC112448962
3	16280001	16330000	92.2221	C3H1orf189
3	16280001	16330000	92.2221	C3H1orf43
3	16280001	16330000	92.2221	MIR190B
3	16280001	16330000	92.2221	TPM3
24	62020001	62070000	91.8622	LOC522479
24	62000001	62050000	91.8622	SERPINB7
16	54900001	54950000	91.5704	AADACL3
16	54900001	54950000	91.5704	PRDX6
16	54900001	54950000	91.5704	SLC9C2
12	18600001	18650000	90.8617	LOC101903925
12	35500001	35550000	90.15	LOC107132993
12	35500001	35550000	90.15	MICU2
12	35520001	35570000	90.15	ZDHHC20
27	1140001	1190000	89.6203	DLGAP2
21	54760001	54810000	89.5853	PRPF39
21	54760001	54810000	89.5853	TOGARAM1
19	37940001	37990000	89.3631	HOXB1
19	37940001	37990000	89.3631	HOXB2
19	37940001	37990000	89.3631	HOXB3
19	37940001	37990000	89.3631	LOC100848766
19	37920001	37970000	89.3631	LOC104975073
19	42800001	42850000	89.1229	BECN1
19	42800001	42850000	89.1229	CNTD1
19	42800001	42850000	89.1229	COA3
19	42780001	42830000	89.1229	EZH1
19	42800001	42850000	89.1229	PSME3
19	42800001	42850000	89.1229	RAMP2
19	42800001	42850000	89.1229	VPS25
19	42800001	42850000	89.1229	WNK4
1	144280001	144330000	89.0347	AIRE
1	144300001	144350000	89.0347	C1H21orf2
1	144300001	144350000	89.0347	PFKL
18	7340001	7390000	88.2607	CDYL2
2	53060001	53110000	88.0803	ARHGAP15
16	64800001	64850000	87.3141	RGL1
16	64800001	64850000	87.3141	TRNAE-CUC
17	52880001	52930000	87.1941	KNTC1
17	52880001	52930000	87.1941	RSRC2
21	22720001	22770000	87.1376	LOC112443243
21	22720001	22770000	87.1376	PDE8A
20	33620001	33670000	87.1345	CARD6
20	33620001	33670000	87.1345	LOC112443039
20	33620001	33670000	87.1345	RPL37
28	14300001	14350000	86.8195	BICC1
28	14320001	14370000	86.8195	LOC101906006
3	93000001	93050000	86.7808	C3H1orf123
3	93000001	93050000	86.7808	CPT2
3	93000001	93050000	86.7808	LOC112446013
3	92980001	93030000	86.7808	LRP8
3	93000001	93050000	86.7808	MAGOH
15	36900001	36950000	86.7588	TRNAW-CCA
2	43380001	43430000	86.7031	ARL6IP6
22	44660001	44710000	86.4004	TRNAG-UCC
6	102040001	102090000	86.1342	AFF1
7	50160001	50210000	86.0866	CTNNA1
7	50160001	50210000	86.0866	LRRTM2
5	65160001	65210000	85.8772	LOC101908204
5	65160001	65210000	85.8772	UTP20
18	36000001	36050000	85.8014	CDH1
21	6900001	6950000	85.4385	MEF2A
10	17780001	17830000	85.2969	LRRC49
3	51040001	51090000	84.7174	RPAP2
22	30100001	30150000	84.4185	MIR1284
18	35900001	35950000	84.401	ZFP90
28	8140001	8190000	84.0323	B3GALNT2
28	8140001	8190000	84.0323	TBCE
9	94760001	94810000	83.9495	TULP4
21	43160001	43210000	83.4918	AKAP6
29	48860001	48910000	83.2769	LOC112444897
18	2920001	2970000	83.2566	ADAT1
18	2920001	2970000	83.2566	KARS
18	2940001	2990000	83.2566	TERF2IP

## Sheet: Sheet6
Table S6. KEGG pathway analysis of Dabieshan candidate genes by θπ and CLR methods.
#Term	ID	Input number	Background number	Corrected P-Value	Input	Hyperlink
MicroRNAs in cancer	bta05206	26	270	0.000226234	PTGS2|MIR195|MIR27A|MIR23A|MAP2K2|PLCG1|MIR181D|MIR181C|MIR15B|TP63|MIR101-1|MIR126|ERBB3|CDKN2A|TNR|CDC25C|BMI1|MIR16B|MIR10A|APC2|EP300|ZEB2|TP53|IRS1|MIR615|MIR324	http://www.genome.jp/kegg-bin/show_pathway?bta05206/bta:791031%09red/bta:538598%09red/bta:100313260%09red/bta:100313303%09red/bta:100313306%09red/bta:615335%09red/bta:785655%09red/bta:100170933%09red/bta:790994%09red/bta:791011%09red/bta:100313387%09red/bta:526409%09red/bta:281542%09red/bta:616369%09red/bta:112446776%09red/bta:507731%09red/bta:790979%09red/bta:510434%09red/bta:282023%09red/bta:51…
Thyroid hormone signaling pathway	bta04919	14	118	0.00557693	DIO1|HDAC3|BMP4|TP53|SLC9A1|ATP1B2|HIF1A|MAP2K2|PLCG1|MED13|SLC16A10|MED16|EP300|SIN3A	http://www.genome.jp/kegg-bin/show_pathway?bta04919/bta:541240%09red/bta:782446%09red/bta:281987%09red/bta:112446776%09red/bta:281814%09red/bta:100298629%09red/bta:518504%09red/bta:281542%09red/bta:317654%09red/bta:404125%09red/bta:282562%09red/bta:510434%09red/bta:524868%09red/bta:407216%09red
Apelin signaling pathway	bta04371	14	140	0.0234086	MRAS|BECN1|SLC9A1|MAP2K2|PRKAG1|EGR1|CAMK4|MEF2A|GABARAP|PIK3R6|PIK3R5|CDH1|ITPR3|GNAI2	http://www.genome.jp/kegg-bin/show_pathway?bta04371/bta:100337083%09red/bta:515621%09red/bta:540803%09red/bta:281879%09red/bta:281791%09red/bta:327715%09red/bta:282324%09red/bta:317654%09red/bta:527278%09red/bta:510434%09red/bta:407231%09red/bta:282637%09red/bta:407125%09red/bta:614838%09red
Basal cell carcinoma	bta05217	9	63	0.0296966	FZD2|BMP4|TP53|DVL2|DVL3|GLI1|SUFU|APC2|PTCH1	http://www.genome.jp/kegg-bin/show_pathway?bta05217/bta:281542%09red/bta:538507%09red/bta:526572%09red/bta:535067%09red/bta:517588%09red/bta:539203%09red/bta:614312%09red/bta:520994%09red/bta:407216%09red
Human T-cell leukemia virus 1 infection	bta05166	18	234	0.0475545	CDKN2B|CDKN2C|GPS2|NFATC3|TP53|BOLA-DQB|CDC27|BOLA-DQA2|EP300|EGR1|CDC23|SLC25A6|MAP2K2|CDKN2A|JAK1|NFKB2|BOLA-DQA5|CHEK2	http://www.genome.jp/kegg-bin/show_pathway?bta05166/bta:281542%09red/bta:526392%09red/bta:540660%09red/bta:518897%09red/bta:505691%09red/bta:112446776%09red/bta:616369%09red/bta:512651%09red/bta:282535%09red/bta:282495%09red/bta:518494%09red/bta:407125%09red/bta:282480%09red/bta:527124%09red/bta:537201%09red/bta:510434%09red/bta:282494%09red/bta:541127%09red
Cushing syndrome	bta04934	14	156	0.0475545	CDKN2B|CDKN2C|FZD2|CDKN2A|KMT2D|KMT2A|RBBP5|DVL2|MAP2K2|DVL3|APC2|ITPR3|GNAI2|PDE8A	http://www.genome.jp/kegg-bin/show_pathway?bta04934/bta:510455%09red/bta:538507%09red/bta:508330%09red/bta:505691%09red/bta:526572%09red/bta:616369%09red/bta:506805%09red/bta:281879%09red/bta:506787%09red/bta:281791%09red/bta:539203%09red/bta:527124%09red/bta:614312%09red/bta:510434%09red
Signaling pathways regulating pluripotency of stem cells	bta04550	13	139	0.0481654	DVL3|FZD2|BMP4|PAX6|MAP2K2|OTX1|BMI1|DVL2|INHBA|INHBC|INHBE|JAK1|APC2	http://www.genome.jp/kegg-bin/show_pathway?bta04550/bta:538507%09red/bta:510666%09red/bta:526572%09red/bta:517587%09red/bta:539203%09red/bta:530785%09red/bta:540628%09red/bta:286857%09red/bta:510434%09red/bta:537201%09red/bta:614312%09red/bta:281867%09red/bta:407216%09red

## Sheet: Sheet7
Table S7. GO pathway analysis of Dabieshan candidate genes by θπ and CLR methods.
#Term	ID	Input number	Background number	Corrected P-Value	Input	Hyperlink
nucleus	GO:0005634	166	2955	6.14599e-11	EGR1|HSF4|UBE2QL1|PRKAG1|ZFR|USP25|GPS2|COMMD3|CAMK4|COTL1|ZC3H10|PWWP2A|IRX4|ZNF473|TAGLN3|SETDB2|ZSCAN23|CDKN2B|CDKN2C|DDIT3|VRK3|R3HDM4|SPAG7|SAFB|POLR3GL|PER1|LDB1|TERF2IP|UBXN6|WDTC1|OVCA2|RFX4|EIF4G1|MTREX|SYNPO2|MEF2A|YBX2|HOXC9|FOXP1|RPS27L|PPRC1|ZNF219|HOXC4|HIF1A|HOXC6|YTHDF2|NACA|CDYL2|MATR3|MAPKAPK5|PPM1B|UBAP2L|PARPBP|BACH1|USP46|OTX1|ADRB2|AFF1|ITPKA|ITPKC|TDRP|HOXA5|ALPK3|HOXB9|BEC…	http://amigo.geneontology.org/amigo/term/GO:0005634
anterior/posterior pattern specification	GO:0009952	23	82	6.14599e-11	HOXC9|HOXC8|HOXB8|HOXC5|HOXC4|HOXC6|TDGF1|OTX1|HOXA11|KMT2A|HOXB9|HOXB2|HOXB3|HOXB1|HOXB6|HOXB7|HOXB5|HOXC10|HOXA7|HOXA5|HOXA4|HOXA2|HOXA9	http://amigo.geneontology.org/amigo/term/GO:0009952
embryonic skeletal system morphogenesis	GO:0048704	16	33	3.676e-10	HOXC9|HOXB8|HOXB9|HOXB2|HOXB3|HOXB1|HOXB6|HOXC4|HOXB5|HOXA7|HOXA6|HOXA5|HOXA4|HOXB7|BMI1|HOXA9	http://amigo.geneontology.org/amigo/term/GO:0048704
nucleoplasm	GO:0005654	114	1867	3.7832e-09	SMARCC2|NUTF2|ACADVL|UBE2QL1|KMT5A|SRSF11|CDK2AP1|DENND2D|RPF2|CPT2|CAMK4|ZC3H10|PWWP2B|SETDB2|DHX9|VRK3|RAB11FIP2|PER1|MACROD2|KLHL8|MTREX|SYNPO2|ELP5|HOXC9|HOXC8|NFATC3|PPRC1|ZNF219|HOXC4|HOXC6|GTF3C1|DENND4B|UROD|MAPKAPK5|THAP11|NEK6|SLC9A1|PARPBP|BACH2|EGR1|TMEM173|B4GALT2|HOXB8|HOXB9|PIAS4|HOXB3|SEC13|EHBP1|MLLT10|HOXB5|UBA2|HOXB4|ZNF131|ITPR3|PHF23|EGLN2|TOP1|SKAP1|GPX4|KDM3B|MDN1|SESN1|RFC…	http://amigo.geneontology.org/amigo/term/GO:0005654
positive regulation of transcription by RNA polymerase II	GO:0045944	66	872	4.68943e-08	INO80|HOXC9|HDAC3|FOXP1|HJV|PPRC1|HAX1|HOXC4|HIF1A|FOXO3|NFATC3|MYOCD|TMEM173|TP63|GPS2|MEF2A|SLC9A1|CHD8|BACH1|EGR1|OTX1|ADRB2|TEF|BCAS3|INHBA|HOXA4|KDM6B|NFKB2|SRA1|DHX9|KMT2A|HOXB9|GLIS1|ASXL2|SBNO2|TET1|HOXB3|HOXB1|HOXB7|MLLT10|HOXB5|HOXC10|PER1|LDB1|HOXB4|ZMIZ2|LMX1B|MED13|EP300|ARID3A|FHOD1|E2F4|TP53|FOXJ3|RFX4|MTF2|HOXA9|HOXA7|HOXA5|MLXIP|SKAP1|HOXA2|ZNF131|SIN3A|GLI1|POU4F3	http://amigo.geneontology.org/amigo/term/GO:0045944
cytosol	GO:0005829	134	2482	8.98512e-08	NUTF2|ACADVL|KMT5A|HDAC3|MYH10|MYL6|USP25|PLIN5|CDK2AP1|ARMH3|GPS2|SMG6|DENND2D|COTL1|GABARAP|PRTN3|GPI|TPM3|WNK4|LPP|PER1|TERF2IP|UBXN6|LMTK2|WDTC1|PTGES3|EIF4G1|SLC2A4|KAT7|CYLD|GFRA3|SYNPO2|ELP5|GBF1|NFATC3|SKAP1|HIF1A|HOXC6|YTHDF2|TTC1|MAPKAPK5|THAP11|PLIN4|NEK6|PPM1B|GNAI2|USP46|TMEM173|PIK3R5|TDRP|BECN1|HOXB2|SEC13|EHBP1|HOXB7|MLLT10|HOXB5|PSMB7|BACH2|ACO2|ASMTL|TNK1|TP53|PEX6|RPAP2|USP50|T…	http://amigo.geneontology.org/amigo/term/GO:0005829
negative regulation of transcription by RNA polymerase II	GO:0000122	52	625	1.78592e-07	SMARCC2|HOXC8|HDAC3|FOXP1|HSF4|KMT5A|ELANE|FOXO3|MYOCD|THAP11|GLIS1|MXD1|TP63|GPS2|HIC1|CHD8|BACH1|EGR1|CRY1|MEF2A|NIPBL|MYT1L|IRX4|TAGLN3|BBX|SIN3A|HOXB8|DDIT3|ZBTB7A|PIAS4|HOXB3|PRDM1|BMI1|HOXB4|HJV|PER1|LDB1|SUFU|EP300|BMP4|E2F4|TP53|ARID5B|WDTC1|MTF2|HOXA7|PURA|HOXA2|CXXC5|BACH2|SARS|PTCH1	http://amigo.geneontology.org/amigo/term/GO:0000122
cytoplasm	GO:0005737	146	2867	4.1871e-07	USH2A|PRKAG1|HSPA9|SBF2|DMGDH|THEMIS|PLIN5|TMEM173|CDC23|COMMD3|ITSN2|ITPKC|FAM110A|ZC3H10|TPPP3|KHK|CDH1|CDH3|MAGOH|CDKN2B|CDKN2C|DDIT3|VRK3|SNTG1|ATP1B2|WNK4|RAMP2|PER1|TERF2IP|GPT|ALS2CL|PA2G4|STRBP|WDTC1|PTGES3|EIF4G1|INCA1|ROBO1|ARHGAP15|KLC1|ELP4|ELMO3|TNFSF13|DSTYK|LIX1L|SKAP1|YTHDF2|ARHGAP9|DNM3|MAPKAPK5|THAP11|CHD3|SLC9A1|UBAP2L|WDR47|TUBA1C|TUBA1A|EGR1|SOX15|TULP4|BICC1|ITPKA|OVCA2|FBXL…	http://amigo.geneontology.org/amigo/term/GO:0005737
DNA binding	GO:0003677	42	517	1.24984e-05	HOXC8|C19H17orf49|ZNF219|INO80|SPATA24|DDIT3|NACA|POLR1D|HIST2H2BF|THAP11|PARPBP|CHD8|BACH1|ASXL2|CRY1|HOXA11|HOXA10|TOX4|SETDB2|SRA1|DHX9|KMT2A|ZNF326|PIAS4|RFC1|POLR2E|REV3L|BBX|CENPT|SYCP3|ZEB2|STRBP|E2F4|TP53|PAX6|MTF2|RPAP1|MBD6|HOXA2|HOXA1|ZHX3|POLR3B	http://amigo.geneontology.org/amigo/term/GO:0003677
RNA polymerase II cis-regulatory region sequence-specific DNA binding	GO:0000978	43	581	8.60742e-05	HOXC9|NFATC3|HSF4|HOXC5|HOXC4|HOXC6|FOXO3|DDIT3|ZNF18|MYOCD|CCAR1|THAP11|MXD1|LHX2|HIC1|EGR1|OTX1|SOX15|GLI1|KDM6B|MYT1L|ZNF473|DHX9|HOXB9|HOXB3|HOXB1|HOXB6|BMI1|HOXB5|HOXB7|POU4F3|EP300|NFKB2|E2F4|TP53|FOXJ3|RFX4|TOP1|HOXA7|HOXA5|HOXA2|SARS|HOXA9	http://amigo.geneontology.org/amigo/term/GO:0000978
DNA-binding transcription activator activity, RNA polymerase II-specific	GO:0001228	32	385	0.000243377	NFATC3|GLIS1|HOXC4|HIF1A|FOXO3|FOXJ3|MYOCD|TP63|LHX2|BACH1|EGR1|OTX1|ZNF473|DDIT3|HOXB2|HOXB3|HOXB1|HOXB7|HOXB5|HOXC10|MLXIP|NFKB2|E2F4|TP53|AIRE|RFX4|HOXA7|HOXA5|HOXA4|HOXA9|ZNF131|POU4F3	http://amigo.geneontology.org/amigo/term/GO:0001228
regulation of translation	GO:0006417	10	39	0.000299654	RBM8A|MAPKAPK5|NOLC1|DNAJC1|HFM1|LSM14A|PTBP1|MAGOH|MATR3|AIRE	http://amigo.geneontology.org/amigo/term/GO:0006417
DNA-binding transcription factor activity, RNA polymerase II-specific	GO:0000981	31	389	0.00065244	HOXC9|HOXC8|FOXP1|HOXA13|GLIS1|HOXC5|HIF1A|HOXC6|FOXO3|ZNF18|EGR1|NPAS3|MEF2A|HOXA11|HOXA10|GLI1|MYT1L|IRX4|HOXB9|HOXB6|HOXB7|HOXB5|PAX6|LMX1B|E2F4|TP53|HOXA7|HOXA5|HOXA3|HOXA2|HOXA1	http://amigo.geneontology.org/amigo/term/GO:0000981
ATP binding	GO:0005524	70	1275	0.00065244	MDN1|DNAH14|MYH14|CDK1|KARS|PRKAG1|HSPA9|UBE2D2|INO80|MYH10|SMC4|MAP2K2|KIF1C|ATP5F1B|KIF16B|ATP8B2|MAPKAPK5|FLT1|NEK6|MINK1|CHD3|NEK5|ABCF3|DHX9|HSPD1|CHD8|CAMK4|HFM1|DSTYK|AFG1L|PAN3|JAK1|ABCD3|TRPM7|PIP4K2A|ERBB3|ALPK3|MYO9A|VRK3|RFC1|MARS|WNK4|PEX6|CDK19|UBA2|CDK11B|DHX29|NIM1K|PSMC4|ABCC12|PFKL|TYRO3|DNAH2|TNK1|TP53|LMTK2|DNAH5|CHEK2|EIF4G1|DNAH9|TOP1|MTREX|UBA5|MARK4|HSPE1|CDK13|SARS|EIF4A1…	http://amigo.geneontology.org/amigo/term/GO:0005524
histone acetyltransferase binding	GO:0035035	7	20	0.00178044	TP53|EGR1|HIF1A|MEF2A|MYOCD|ZBTB7A|BCAS3	http://amigo.geneontology.org/amigo/term/GO:0035035
midbody	GO:0030496	15	126	0.00320888	MYH10|AGBL5|ARL3|USP50|MARK4|CDK1|CYLD|TTC28|APC2|URB2|PTCH1|GNAI2|MPLKIP|MAPRE3|KIF20A	http://amigo.geneontology.org/amigo/term/GO:0030496
proximal/distal pattern formation	GO:0009954	7	23	0.00335853	HOXC9|TP63|HOXB9|HOXA11|HOXC10|GLI1|HOXA9	http://amigo.geneontology.org/amigo/term/GO:0009954
dorsal/ventral pattern formation	GO:0009953	7	27	0.00720722	LHX2|HOXB2|HOXA11|GLI1|FBXL15|HOXA2|FGF8	http://amigo.geneontology.org/amigo/term/GO:0009953
mRNA transport	GO:0051028	7	28	0.00836259	NUTF2|DHX9|SLBP2|RBM8A|SEC13|MAGOH|EIF5A	http://amigo.geneontology.org/amigo/term/GO:0051028
Golgi apparatus	GO:0005794	39	639	0.00865108	KIAA0319L|HDAC3|GNPTAB|ARL3|ZDHHC20|DENND4B|MPLKIP|MINK1|TMED5|CAND1|C3H1orf43|CDK13|TMEM173|CHPT1|SLC16A13|CDH1|B4GALT2|CHEK2|ST3GAL3|JAKMIP2|GALNTL6|BECN1|STX16|ZDHHC3|UBA5|APC2|MOB4|ZDHHC1|GALNT14|LMTK2|RAB33B|KIF1C|CEPT1|ATP8B2|TMEM214|YIPF1|PTCH1|PSKH1|KIF20A	http://amigo.geneontology.org/amigo/term/GO:0005794
p53 binding	GO:0002039	9	54	0.0113647	TP63|TP53|CHD8|KMT5A|PSME3|HIF1A|USP10|MAPKAPK5|EP300	http://amigo.geneontology.org/amigo/term/GO:0002039
positive regulation of transcription, DNA-templated	GO:0045893	20	266	0.0391301	SMARCC2|KARS|FZD2|DDIT3|PAX6|DVL3|MECOM|EGR1|KMT2A|HIF1A|CAMK4|DVL2|INHBA|BMP4|HOXA11|MED16|CDH1|PTCH1|CHEK2|MAPRE3	http://amigo.geneontology.org/amigo/term/GO:0045893
homophilic cell adhesion via plasma membrane adhesion molecules	GO:0007156	11	98	0.0402643	PCDH9|SDK2|CDH12|ROBO1|PCDH1|CELSR2|PALLD|CNTN4|CDH18|CDH1|CDH3	http://amigo.geneontology.org/amigo/term/GO:0007156
smoothened signaling pathway	GO:0007224	8	54	0.0464508	BMP4|IFT80|DHH|ARL3|C1H21orf2|HSPB11|GLI1|PTCH1	http://amigo.geneontology.org/amigo/term/GO:0007224
promoter-specific chromatin binding	GO:1990841	7	41	0.0475446	DHX9|E2F4|TP53|EGR1|BMI1|NIPBL|PRDM1	http://amigo.geneontology.org/amigo/term/GO:1990841
transcription, DNA-templated	GO:0006351	9	70	0.0475545	HOXC9|HOXB9|ZBTB7A|ASXL2|ZNF219|INO80|POLR1D|POLR3B|HOXA9	http://amigo.geneontology.org/amigo/term/GO:0006351
stress fiber	GO:0001725	8	56	0.0475545	MYH10|FHOD1|MYH14|NEBL|TPM3|LPP|PALLD|SYNPO2	http://amigo.geneontology.org/amigo/term/GO:0001725
kinase binding	GO:0019900	8	56	0.0475545	JAKMIP2|DLG2|DLG4|LRRC24|PER1|PFKL|TTC28|PDE8A	http://amigo.geneontology.org/amigo/term/GO:0019900
DNA-binding transcription factor activity	GO:0003700	19	258	0.0496039	HOXC9|DDIT3|HIC1|HOXB9|RFX4|HOXB3|BACH1|ZNF219|TEF|E2F4|FOXO3|MECOM|FOXP1|NFATC3|HOXA2|HIF1A|HSF4|HOXA9|SIN3A	http://amigo.geneontology.org/amigo/term/GO:0003700

## Sheet: Sheet8
Table S8. Summary of genes from FST.
Chrom	Starting position	Ending position	FST	Gene
13	22760001	22810000	0.883988	MLLT10
13	22720001	22770000	0.879186	SKIDA1
13	22920001	22970000	0.860098	DNAJC1
13	22700001	22750000	0.854345	CASC10
29	48820001	48870000	0.795081	KCNQ1
7	50300001	50350000	0.788887	SIL1
7	50280001	50330000	0.786504	LOC101905788
19	26360001	26410000	0.779028	KIF1C
19	26380001	26430000	0.777625	CAMTA2
19	26380001	26430000	0.777625	INCA1
19	26380001	26430000	0.777625	LOC100848357
7	50100001	50150000	0.769281	CTNNA1
19	26400001	26450000	0.768589	ENO3
19	26400001	26450000	0.768589	PFN1
19	26400001	26450000	0.768589	SPAG7
7	50720001	50770000	0.766604	ECSCR
7	50720001	50770000	0.766604	SMIM33
7	50720001	50770000	0.766604	TMEM173
7	58020001	58070000	0.764736	PPP2R2B
7	50700001	50750000	0.764684	DNAJC18
7	50620001	50670000	0.761899	MATR3
7	50620001	50670000	0.761899	MZB1
7	50620001	50670000	0.761899	PAIP2
7	50620001	50670000	0.761899	PROB1
7	50620001	50670000	0.761899	SLC23A1
7	50560001	50610000	0.759561	LOC112447601
7	50560001	50610000	0.759561	SNHG4
8	400001	450000	0.75896	LOC112447868
13	22580001	22630000	0.754078	MIR2285D
8	200001	250000	0.753936	MFSD14B
7	50760001	50810000	0.749323	UBE2D2
16	2940001	2990000	0.744696	DSTYK
29	48860001	48910000	0.742744	LOC112444897
3	93180001	93230000	0.742113	PODN
3	93180001	93230000	0.742113	SCP2
13	22380001	22430000	0.739518	C13H10orf113
13	22380001	22430000	0.739518	NEBL
7	50640001	50690000	0.739398	SPATA24
7	49900001	49950000	0.737753	HSPA9
7	50820001	50870000	0.736215	CXXC5
19	28340001	28390000	0.733178	PIK3R5
19	28340001	28390000	0.733178	PIK3R6
7	50840001	50890000	0.732429	LOC112447430
7	50160001	50210000	0.728373	LRRTM2
19	26340001	26390000	0.727031	ZFP3
7	52640001	52690000	0.725195	DIAPH1
7	49880001	49930000	0.724687	ETF1
7	49880001	49930000	0.724687	LOC112447603
19	26320001	26370000	0.723292	ZNF232
19	26320001	26370000	0.723292	ZNF594
16	2960001	3010000	0.721216	TMCC2
7	50920001	50970000	0.719356	LOC112447552
7	50920001	50970000	0.719356	PSD2
7	49780001	49830000	0.717211	EGR1
7	49780001	49830000	0.717211	KDM3B
7	49780001	49830000	0.717211	LOC101904825
7	49780001	49830000	0.717211	REEP2
1	21240001	21290000	0.71641	USP25
19	28220001	28270000	0.714496	CCDC42
19	28220001	28270000	0.714496	LOC112442760
16	2880001	2930000	0.714287	LOC112441810
16	2880001	2930000	0.714287	RBBP5
7	49020001	49070000	0.712225	KLHL3
13	10540001	10590000	0.711599	OTOR
13	10540001	10590000	0.711599	SNRPB2
19	28260001	28310000	0.710922	MFSD6L
7	51420001	51470000	0.709891	CYSTM1
7	51420001	51470000	0.709891	LOC112447433
7	51420001	51470000	0.709891	PFDN1
25	42160001	42210000	0.70871	FAM20C
7	19900001	19950000	0.707942	MAP2K2
16	72480001	72530000	0.706806	KCNH1
5	47620001	47670000	0.705287	IRAK3
5	47620001	47670000	0.705287	LLPH
5	47620001	47670000	0.705287	LOC107132486
5	47620001	47670000	0.705287	TMBIM4
20	2920001	2970000	0.704338	RANBP17
8	660001	710000	0.702827	PALLD
2	126080001	126130000	0.701987	SLC9A1
2	126080001	126130000	0.701987	TRNAE-UUC
3	19580001	19630000	0.70144	PIP5K1A
3	19580001	19630000	0.70144	VPS72
3	92300001	92350000	0.700926	DIO1
3	92300001	92350000	0.700926	HSPB11
3	92300001	92350000	0.700926	YIPF1
13	23320001	23370000	0.700488	LOC112449266
13	23320001	23370000	0.700488	TRNAN-GUU
26	38600001	38650000	0.699264	FAM204A
3	19560001	19610000	0.699205	PSMD4
3	98080001	98130000	0.698151	LOC112445888
3	98080001	98130000	0.698151	LOC112445889
3	98080001	98130000	0.698151	SKINT1
3	98060001	98110000	0.69711	TRNAR-ACG
7	52600001	52650000	0.69656	LOC112447441
2	125760001	125810000	0.695852	AHDC1
16	2860001	2910000	0.694694	TMEM81
25	42200001	42250000	0.694068	LOC516442
19	28320001	28370000	0.69381	LOC101904013
22	44660001	44710000	0.692758	ERC2
22	44660001	44710000	0.692758	TRNAG-UCC
19	26280001	26330000	0.692205	LOC101904050
19	26280001	26330000	0.692205	SCIMP
2	125780001	125830000	0.691885	WASF2
16	41200001	41250000	0.691316	LOC112441834
16	41200001	41250000	0.691316	LOC112441907
16	41200001	41250000	0.691316	VPS13D
19	30540001	30590000	0.691007	DNAH9
3	98040001	98090000	0.690718	LOC107131387
7	51560001	51610000	0.690482	LOC107132639
7	51560001	51610000	0.690482	LOC112447436
7	51560001	51610000	0.690482	SLC4A9
7	51560001	51610000	0.690482	TRNAE-CUC
7	52500001	52550000	0.690372	LOC101904103
7	52500001	52550000	0.690372	PCDHGA2
7	52500001	52550000	0.690372	PCDHGA8
7	52500001	52550000	0.690372	PCDHGB4
10	81340001	81390000	0.690147	LOC112448653
10	81340001	81390000	0.690147	SUSD6
2	125820001	125870000	0.68947	LOC112443702
7	49740001	49790000	0.688179	FAM53C
16	4560001	4610000	0.68817	LOC104974370
7	51540001	51590000	0.686812	HBEGF
13	23400001	23450000	0.686017	BMI1
13	23400001	23450000	0.686017	COMMD3
10	80820001	80870000	0.685914	DCAF5
13	24380001	24430000	0.683478	OTUD1
5	56740001	56790000	0.682886	ATP5F1B
5	56740001	56790000	0.682886	NACA
5	56740001	56790000	0.682886	PTGES3
2	124800001	124850000	0.682602	LOC112443660
2	124800001	124850000	0.682602	RAB42
2	124800001	124850000	0.682602	TAF12
13	38200001	38250000	0.681695	LOC112449402
13	38200001	38250000	0.681695	MGME1
13	38200001	38250000	0.681695	SNX5
5	56780001	56830000	0.679949	BAZ2A
5	56780001	56830000	0.679949	LOC112446708
5	56780001	56830000	0.679949	LOC112446861
5	56780001	56830000	0.679949	MIR677
5	56780001	56830000	0.679949	RBMS2
3	98000001	98050000	0.678077	SLC5A9
7	49680001	49730000	0.677576	CDC25C
7	49680001	49730000	0.677576	GFRA3
7	49680001	49730000	0.677576	TRNAE-UUC
13	23420001	23470000	0.676819	SPAG6
7	19920001	19970000	0.676533	ZBTB7A
2	124780001	124830000	0.675846	GMEB1
14	48680001	48730000	0.675747	TRPS1
7	49700001	49750000	0.675614	MIR2459
7	49700001	49750000	0.675614	SLBP2
18	55860001	55910000	0.675569	CCDC155
18	55860001	55910000	0.675569	GFY
18	55860001	55910000	0.675569	LOC112442461
18	55860001	55910000	0.675569	PIH1D1
18	55860001	55910000	0.675569	PTH2
18	55860001	55910000	0.675569	SLC17A7
7	48700001	48750000	0.675491	SPOCK1
16	50780001	50830000	0.675338	CFAP74
18	55840001	55890000	0.674952	DKKL1
18	55840001	55890000	0.674952	TEAD2
8	520001	570000	0.674687	ANXA10
8	82160001	82210000	0.67468	PTCH1
23	17500001	17550000	0.67343	C23H6orf223
23	17500001	17550000	0.67343	LOC112443745
16	79160001	79210000	0.672948	LOC112441879
7	52960001	53010000	0.67285	KIAA0141
7	52960001	53010000	0.67285	LOC104969197
7	52960001	53010000	0.67285	PCDH12
10	81020001	81070000	0.672451	EXD2
10	81020001	81070000	0.672451	GALNT16
10	81020001	81070000	0.672451	LOC112448518
12	86620001	86670000	0.672439	ADPRHL1
12	86620001	86670000	0.672439	DCUN1D2
12	86620001	86670000	0.672439	GRTP1
12	86620001	86670000	0.672439	LOC112449110
12	86620001	86670000	0.672439	MIR2302
3	98300001	98350000	0.671692	TRABD2B
3	97960001	98010000	0.67067	LOC107132336
13	11340001	11390000	0.670432	LOC100337293
13	11340001	11390000	0.670432	LOC112449358
13	11340001	11390000	0.670432	LOC112449359
19	44280001	44330000	0.669822	FZD2
19	44280001	44330000	0.669822	GPATCH8
3	92140001	92190000	0.669322	LOC112446012
3	92140001	92190000	0.669322	LOC112446110
3	92140001	92190000	0.669322	TCEANC2
3	92140001	92190000	0.669322	TMEM59
12	86580001	86630000	0.66858	LAMP1
14	47580001	47630000	0.668142	EIF3H
16	79180001	79230000	0.667597	LOC112441919
5	112460001	112510000	0.665068	TEF
5	112460001	112510000	0.665068	ZC3H7B
5	56880001	56930000	0.66506	GLS2
5	56880001	56930000	0.66506	MIP
5	56880001	56930000	0.66506	SPRYD4
19	42560001	42610000	0.66393	ATP6V0A1
19	42560001	42610000	0.66393	LOC112442811
14	34660001	34710000	0.663892	LOC112449626
7	19640001	19690000	0.663872	CHAF1A
7	19640001	19690000	0.663872	HDGFL2
7	19640001	19690000	0.663872	LOC101902724
7	19640001	19690000	0.663872	UBXN6
7	57520001	57570000	0.66338	POU4F3
2	63180001	63230000	0.662326	MGAT5
7	49180001	49230000	0.661959	HNRNPA0
12	86640001	86690000	0.661944	TMCO3
16	41160001	41210000	0.661841	DHRS3
13	42820001	42870000	0.661645	ABHD12
13	42820001	42870000	0.661645	LOC112449292
13	42820001	42870000	0.661645	TRNAC-ACA
7	53760001	53810000	0.661595	LOC100847454
7	53760001	53810000	0.661595	LOC104969199
13	11320001	11370000	0.660781	LOC112449357
16	4580001	4630000	0.660625	IL19
7	53000001	53050000	0.660606	RNF14
28	44240001	44290000	0.660008	2022-03-08
5	65960001	66010000	0.659864	PARPBP
16	50800001	50850000	0.659698	CALML6
16	50800001	50850000	0.659698	LOC112441930
16	50800001	50850000	0.659698	TMEM52
13	38180001	38230000	0.659057	LOC104973774
25	25080001	25130000	0.658948	GTF3C1
25	25080001	25130000	0.658948	KIAA0556
7	53780001	53830000	0.658374	ARHGAP26
19	38340001	38390000	0.658241	SKAP1
19	38340001	38390000	0.658241	SNX11
19	38360001	38410000	0.657619	CBX1
13	10600001	10650000	0.657567	LOC782456
12	85360001	85410000	0.654886	LOC112449091
12	85360001	85410000	0.654886	LOC112449092
7	51580001	51630000	0.654527	ANKHD1
13	38140001	38190000	0.653071	LOC107133045
19	42740001	42790000	0.652917	CNTNAP1
19	42740001	42790000	0.652917	EZH1
3	79820001	79870000	0.652894	LEPR
4	62860001	62910000	0.652684	BMPER
13	42840001	42890000	0.652608	ANKRD16
19	47160001	47210000	0.652428	2022-03-10
7	19660001	19710000	0.652083	SH3GL1
11	320001	370000	0.651392	TMEM87B
7	52940001	52990000	0.65119	PCDH1
7	52940001	52990000	0.65119	TRNAC-GCA
5	112380001	112430000	0.650825	CHADL
5	112380001	112430000	0.650825	L3MBTL2
5	112380001	112430000	0.650825	LOC112446896
5	112380001	112430000	0.650825	RANGAP1
7	19620001	19670000	0.650077	PLIN4
7	52320001	52370000	0.649292	LOC100848799
7	52320001	52370000	0.649292	LOC786553
7	52320001	52370000	0.649292	PCDHB11
7	52320001	52370000	0.649292	PCDHB14
7	52580001	52630000	0.649177	PCDHGC3
3	120860001	120910000	0.648887	FAM240A
3	120860001	120910000	0.648887	RTP5
12	86560001	86610000	0.648697	CUL4A
12	86560001	86610000	0.648697	LOC112449100
3	98240001	98290000	0.648556	LOC112446157
7	49060001	49110000	0.648293	MIR874
19	44080001	44130000	0.648268	RUNDC3A
19	44080001	44130000	0.648268	SLC25A39
19	44080001	44130000	0.648268	SLC4A1
8	83340001	83390000	0.647663	AAED1
13	23600001	23650000	0.647493	MIR2285K-2
13	23600001	23650000	0.647493	PIP4K2A
19	44520001	44570000	0.647167	EFTUD2
19	44520001	44570000	0.647167	GJC1
19	44520001	44570000	0.647167	HIGD1B
19	28160001	28210000	0.647155	LOC112442832
19	28160001	28210000	0.647155	MYH10
14	47240001	47290000	0.647103	LOC101904715
5	65420001	65470000	0.646767	MYBPC1
3	19460001	19510000	0.646689	PI4KB
3	19460001	19510000	0.646689	RFX5
10	78500001	78550000	0.646496	CCDC196
8	83260001	83310000	0.64605	CDC14B
7	49400001	49450000	0.646033	FAM13B
7	49400001	49450000	0.646033	PKD2L2
7	49400001	49450000	0.646033	TRNAG-UCC
7	51240001	51290000	0.645962	LOC104969190
7	51240001	51290000	0.645962	LOC112447581
7	52120001	52170000	0.645581	LOC107132640
7	52120001	52170000	0.645581	PCDHB1
7	54280001	54330000	0.645483	LOC107132646
19	43980001	44030000	0.645172	ASB16
19	43980001	44030000	0.645172	ATXN7L3
19	43980001	44030000	0.645172	C19H17orf53
19	43980001	44030000	0.645172	LOC101907697
19	43980001	44030000	0.645172	TMUB2
19	43980001	44030000	0.645172	UBTF
19	27420001	27470000	0.645101	DNAH2
3	93020001	93070000	0.64486	C3H1orf123
3	93020001	93070000	0.64486	CPT2
3	93020001	93070000	0.64486	LOC112446013
7	49640001	49690000	0.644785	CDC23
13	23460001	23510000	0.642872	TRNASTOP-UCA
5	65860001	65910000	0.642572	NUP37
5	65860001	65910000	0.642572	WASHC3
5	56720001	56770000	0.642342	PRIM1
19	44040001	44090000	0.642003	LOC107131530
9	25140001	25190000	0.641964	MIR2284O
3	19480001	19530000	0.641295	ZNF687
11	75240001	75290000	0.641257	KLHL29
11	75240001	75290000	0.641257	LOC112448816
11	75240001	75290000	0.641257	LOC112448817
3	93120001	93170000	0.640471	SLC1A7
5	112360001	112410000	0.640315	LOC112446777
5	112360001	112410000	0.640315	MIR2441
7	49160001	49210000	0.639406	TRNAR-ACG
3	97940001	97990000	0.639292	SPATA6
3	97940001	97990000	0.639292	TRNAT-AGU
22	32480001	32530000	0.639181	TMF1
22	32480001	32530000	0.639181	UBA3
7	49620001	49670000	0.639018	KIF20A
7	49620001	49670000	0.639018	LOC112447630
19	26420001	26470000	0.638966	GP1BA
19	26420001	26470000	0.638966	RNF167
19	26420001	26470000	0.638966	SLC25A11
5	65980001	66030000	0.638888	PMCH
7	52300001	52350000	0.637785	LOC100848138
7	52300001	52350000	0.637785	LOC107131225
7	51620001	51670000	0.636806	LOC112447668
13	23620001	23670000	0.636712	LOC101905823
19	30720001	30770000	0.634905	MAP2K4
22	30320001	30370000	0.6346	FOXP1
3	19500001	19550000	0.634564	LOC112446070
5	47580001	47630000	0.634116	TRNAK-CUU
15	25040001	25090000	0.633997	FAM55A
15	25040001	25090000	0.633997	LOC112441611
15	25040001	25090000	0.633997	NXPE4
7	18920001	18970000	0.633991	PTPRS
3	19320001	19370000	0.63389	POGZ
22	48780001	48830000	0.633847	DUSP7
22	48780001	48830000	0.633847	LOC112443472
22	48780001	48830000	0.633847	POC1A
22	48780001	48830000	0.633847	TRNAG-CCC
26	10620001	10670000	0.633834	ACTA2
20	3200001	3250000	0.633658	FGF18
20	3200001	3250000	0.633658	NPM1
5	112440001	112490000	0.633519	TRNAG-UCC
16	4840001	4890000	0.63351	C16H1orf116
16	4840001	4890000	0.63351	PFKFB2
16	4840001	4890000	0.63351	YOD1
6	58220001	58270000	0.63332	KLHL5
6	58220001	58270000	0.63332	TMEM156
11	72600001	72650000	0.633044	LOC101906001
11	72600001	72650000	0.633044	LOC112448909
11	72600001	72650000	0.633044	MAPRE3
11	72600001	72650000	0.633044	TMEM214
19	42760001	42810000	0.631511	RAMP2
19	42760001	42810000	0.631511	VPS25
7	53600001	53650000	0.631487	FGF1
7	53600001	53650000	0.631487	MIR2460
19	11120001	11170000	0.631239	MED13
20	70000001	70050000	0.631187	IRX2
20	70000001	70050000	0.631187	LOC100139061
26	22540001	22590000	0.631141	ARMH3
26	22540001	22590000	0.631141	KCNIP2
26	22540001	22590000	0.631141	OGA
19	30580001	30630000	0.631134	ZNF18
18	55820001	55870000	0.630581	CD37
18	55820001	55870000	0.630581	MIR2330
19	42580001	42630000	0.630364	HSD17B1
19	42580001	42630000	0.630364	LOC107131525
19	42580001	42630000	0.630364	NAGLU
16	40800001	40850000	0.629971	LOC112441832
16	40800001	40850000	0.629971	TNFSF4
7	90240001	90290000	0.629694	ADGRV1
3	92660001	92710000	0.629603	GLIS1
7	51260001	51310000	0.62946	PURA
10	78560001	78610000	0.629238	GPHN
5	107240001	107290000	0.628364	KDM5A
16	4540001	4590000	0.627854	IL10
6	58460001	58510000	0.627725	RFC1
19	44540001	44590000	0.627468	MIR2343
22	48560001	48610000	0.627157	DNAH1
22	48560001	48610000	0.627157	GLYCTK
22	48560001	48610000	0.627157	MIR135A-1
19	11140001	11190000	0.627109	INTS2
26	22820001	22870000	0.627053	NOLC1
16	51220001	51270000	0.626978	ACAP3
16	51220001	51270000	0.626978	B3GALT6
16	51220001	51270000	0.626978	C1QTNF12
16	51220001	51270000	0.626978	LOC112441769
16	51220001	51270000	0.626978	SCNN1D
16	51220001	51270000	0.626978	UBE2J2
19	31000001	31050000	0.626705	LOC112442638
19	31000001	31050000	0.626705	MYOCD
16	71420001	71470000	0.626331	DTL
16	71420001	71470000	0.626331	INTS7
1	128380001	128430000	0.626071	CLSTN2
20	3720001	3770000	0.625931	FBXW11
19	44500001	44550000	0.625924	ADAM11
22	32500001	32550000	0.625921	EOGT
15	30920001	30970000	0.625887	ARHGEF12
17	52300001	52350000	0.625591	C17H12orf65
17	52300001	52350000	0.625591	CDK2AP1
17	52300001	52350000	0.625591	MPHOSPH9
16	51200001	51250000	0.625053	CPTP
16	51200001	51250000	0.625053	INTS11
16	51200001	51250000	0.625053	PUSL1
14	44200001	44250000	0.624715	PAG1
7	58840001	58890000	0.624397	JAKMIP2
7	58840001	58890000	0.624397	TRNAA-AGC
7	51280001	51330000	0.623695	IGIP
11	300001	350000	0.623499	FBLN7
13	42800001	42850000	0.623062	PYGB
1	130380001	130430000	0.62301	PIK3CB
7	16780001	16830000	0.622839	FBN3
1	114720001	114770000	0.622775	LOC112448278
12	85340001	85390000	0.622338	ANKRD10
2	125860001	125910000	0.622281	CD164L2
2	125860001	125910000	0.622281	GPR3
19	47780001	47830000	0.62206	ACE3
19	47780001	47830000	0.62206	ACE
13	23480001	23530000	0.621979	LOC112449267
22	48160001	48210000	0.621894	GLT8D1
22	48160001	48210000	0.621894	GNL3
22	48160001	48210000	0.621894	LOC112443563
22	48160001	48210000	0.621894	LOC112443564
22	48160001	48210000	0.621894	LOC112443567
22	48160001	48210000	0.621894	PBRM1
21	43560001	43610000	0.621734	NPAS3
15	42780001	42830000	0.621196	SBF2
16	51180001	51230000	0.620635	DVL1
16	51180001	51230000	0.620635	TAS1R3
5	112500001	112550000	0.620391	TOB2
3	19440001	19490000	0.620181	SELENBP1
19	37940001	37990000	0.620085	HOXB1
19	37940001	37990000	0.620085	HOXB2
19	37940001	37990000	0.620085	HOXB3
19	37940001	37990000	0.620085	LOC100848766
11	104280001	104330000	0.619881	ADAMTS13
11	104280001	104330000	0.619881	LOC107132968
11	104280001	104330000	0.619881	REXO4
11	104280001	104330000	0.619881	STKLD1
7	16760001	16810000	0.619877	CCL25
15	29560001	29610000	0.619666	CCDC84
15	29560001	29610000	0.619666	FOXR1
15	29560001	29610000	0.619666	RPS25
15	29560001	29610000	0.619666	SLC37A4
15	29560001	29610000	0.619666	TRAPPC4
26	23260001	23310000	0.619649	ARL3
26	23260001	23310000	0.619649	LOC104975974
26	23260001	23310000	0.619649	TRIM8
2	126820001	126870000	0.619502	CEP85
2	126820001	126870000	0.619502	SH3BGRL3
2	126820001	126870000	0.619502	UBXN11
3	19360001	19410000	0.619501	PSMB4
19	46120001	46170000	0.619279	KANSL1
12	85400001	85450000	0.619212	ARHGEF7
11	62120001	62170000	0.61921	LOC104973394
7	52760001	52810000	0.619191	ARAP3
20	1380001	1430000	0.619182	LOC104975179
16	50820001	50870000	0.619012	GNB1
26	22800001	22850000	0.61879	LOC112444554
26	22800001	22850000	0.61879	PPRC1
19	27860001	27910000	0.618762	CTC1
19	27860001	27910000	0.618762	LOC101903678
19	27860001	27910000	0.618762	PFAS
19	27860001	27910000	0.618762	RANGRF
19	27860001	27910000	0.618762	SLC25A35
16	6440001	6490000	0.618289	KCNT2
22	50260001	50310000	0.618226	RBM6
8	60240001	60290000	0.618111	LOC100299372
8	60240001	60290000	0.618111	LOC523083
8	60240001	60290000	0.618111	LOC532403
8	60240001	60290000	0.618111	OR2S2
11	104260001	104310000	0.617957	LOC100139115
11	104260001	104310000	0.617957	SURF2
11	104260001	104310000	0.617957	SURF4
12	18600001	18650000	0.617945	LOC101903925
19	47140001	47190000	0.617797	LOC112442682
16	71700001	71750000	0.617096	LOC101908531
16	71700001	71750000	0.617096	LPGAT1
16	71700001	71750000	0.617096	TRNAC-GCA
26	10640001	10690000	0.616912	FAS
26	10640001	10690000	0.616912	LOC112444519
19	47800001	47850000	0.616427	KCNH6
9	25040001	25090000	0.616411	LOC112448123
9	25040001	25090000	0.616411	LOC112448124
29	10360001	10410000	0.615744	DLG2
19	27540001	27590000	0.61557	CHD3
19	27540001	27590000	0.61557	CYB5D1
19	27540001	27590000	0.61557	KDM6B
19	27540001	27590000	0.61557	LOC112442833
19	27540001	27590000	0.61557	NAA38
19	27540001	27590000	0.61557	RNF227
19	27540001	27590000	0.61557	TMEM88
5	56900001	56950000	0.614311	TIMELESS
13	42880001	42930000	0.614221	GDI2
13	42880001	42930000	0.614221	LOC112449291
1	49920001	49970000	0.614191	ALCAM
22	50220001	50270000	0.614111	LOC112443549
22	50220001	50270000	0.614111	RBM5
12	18680001	18730000	0.613833	FNDC3A
29	48600001	48650000	0.613664	CARS
29	48600001	48650000	0.613664	NAP1L4
7	49580001	49630000	0.613531	BRD8
7	49580001	49630000	0.613531	LOC101902951
7	49580001	49630000	0.613531	NME5
3	16420001	16470000	0.613458	CREB3L4
3	16420001	16470000	0.613458	JTB
3	16420001	16470000	0.613458	NUP210L
3	16420001	16470000	0.613458	RAB13
3	16420001	16470000	0.613458	RPS27
4	119580001	119630000	0.613393	VIPR2
11	87920001	87970000	0.613392	ADAM17
11	87920001	87970000	0.613392	IAH1
11	87920001	87970000	0.613392	LOC107132949
14	45020001	45070000	0.613221	MAL2
5	107260001	107310000	0.613143	CCDC77
13	23860001	23910000	0.612867	LOC112449429
19	26920001	26970000	0.612604	ACADVL
19	26920001	26970000	0.612604	CLDN7
19	26920001	26970000	0.612604	CTDNEP1
19	26920001	26970000	0.612604	DLG4
19	26920001	26970000	0.612604	DVL2
19	26920001	26970000	0.612604	ELP5
19	26920001	26970000	0.612604	GABARAP
19	26920001	26970000	0.612604	MIR324
19	26920001	26970000	0.612604	PHF23
15	30900001	30950000	0.612551	POU2F3
15	30900001	30950000	0.612551	TMEM136
2	124860001	124910000	0.61254	RCC1
2	124860001	124910000	0.61254	TRNAU1AP
10	65080001	65130000	0.61253	GATM
10	65080001	65130000	0.61253	LOC101902663
10	65080001	65130000	0.61253	LOC112448496
5	55700001	55750000	0.612198	AGAP2
5	55700001	55750000	0.612198	CDK4
5	55700001	55750000	0.612198	CYP27B1
5	55700001	55750000	0.612198	LOC112446705
5	55700001	55750000	0.612198	2022-03-09
5	55700001	55750000	0.612198	OS9
5	55700001	55750000	0.612198	TSPAN31
25	31420001	31470000	0.611546	LOC112444315
29	43280001	43330000	0.61136	CDCA5
29	43280001	43330000	0.61136	FAU
29	43280001	43330000	0.61136	MRPL49
29	43280001	43330000	0.61136	TM7SF2
29	43280001	43330000	0.61136	TMEM262
29	43280001	43330000	0.61136	VPS51
29	43280001	43330000	0.61136	ZFPL1
29	43280001	43330000	0.61136	ZNHIT2
14	61440001	61490000	0.611273	ATP6V1C1
15	28880001	28930000	0.611196	JAML
15	28880001	28930000	0.611196	MPZL3
7	51780001	51830000	0.611096	DND1
7	51780001	51830000	0.611096	HARS2
7	51780001	51830000	0.611096	HARS
7	51780001	51830000	0.611096	IK
7	51780001	51830000	0.611096	NDUFA2
7	51780001	51830000	0.611096	WDR55
7	51780001	51830000	0.611096	ZMAT2
22	50100001	50150000	0.610848	GNAI2
22	50100001	50150000	0.610848	SLC38A3
22	50100001	50150000	0.610848	TRNAE-UUC
7	52100001	52150000	0.610843	PCDHA13
11	87940001	87990000	0.610554	CPSF3
19	27840001	27890000	0.610545	AURKB
19	27840001	27890000	0.610545	LOC112442636
19	27840001	27890000	0.610545	TRNAD-GUC
19	27840001	27890000	0.610545	TRNAG-UCC
19	27840001	27890000	0.610545	TRNAI-AAU
19	27840001	27890000	0.610545	TRNAP-CGG
19	27840001	27890000	0.610545	TRNAS-AGA
19	27840001	27890000	0.610545	TRNAT-AGU
19	27840001	27890000	0.610545	TRNAW-CCA
26	22840001	22890000	0.610074	ELOVL3
26	22840001	22890000	0.610074	GBF1
26	22840001	22890000	0.610074	PITX3
16	4740001	4790000	0.610018	FCAMR
5	55680001	55730000	0.609744	EEF1AKMT3
5	55680001	55730000	0.609744	METTL1
5	55680001	55730000	0.609744	TSFM
20	3760001	3810000	0.60968	LOC101903110
15	42820001	42870000	0.609584	LOC104974249
19	38720001	38770000	0.609446	LOC100848872
19	38720001	38770000	0.609446	TBKBP1
19	38720001	38770000	0.609446	TBX21
28	34500001	34550000	0.609224	LOC112444769
3	98200001	98250000	0.609123	LOC112446018
15	29520001	29570000	0.609056	BCL9L
15	29520001	29570000	0.609056	UPK2
16	41080001	41130000	0.608929	LOC112441833
16	41360001	41410000	0.608776	TRNAG-CCC
9	25280001	25330000	0.608651	HINT3
9	25280001	25330000	0.608651	TRMT11
25	42080001	42130000	0.607722	LOC783396
10	67200001	67250000	0.607715	SAMD4A
7	51000001	51050000	0.607705	NRG2
7	58700001	58750000	0.607276	DPYSL3
25	25300001	25350000	0.607233	GSG1L
16	51160001	51210000	0.606872	MXRA8
3	91800001	91850000	0.606518	SSBP3
16	56400001	56450000	0.606412	KIAA0040
13	37620001	37670000	0.606167	PCSK2
1	135860001	135910000	0.605974	CDV3
11	88480001	88530000	0.605828	KIDINS220
20	58860001	58910000	0.605743	TRIO
20	58860001	58910000	0.605743	TRNAC-ACA
7	49320001	49370000	0.605488	LOC104969184
7	49320001	49370000	0.605488	LOC107132636
7	49320001	49370000	0.605488	MYOT
18	13100001	13150000	0.605482	JPH3
15	61360001	61410000	0.605135	MPPED2
4	119560001	119610000	0.604853	WDR60
26	22220001	22270000	0.604845	BTRC
29	48640001	48690000	0.604425	PHLDA2
15	29820001	29870000	0.604161	CBL
25	41960001	42010000	0.60389	LOC101904836
25	41960001	42010000	0.60389	PRKAR1B
10	68460001	68510000	0.603848	LOC101903945
19	38380001	38430000	0.603746	NFE2L1
15	29100001	29150000	0.60365	KMT2A
15	29100001	29150000	0.60365	LOC101902944
18	56000001	56050000	0.602463	NOSIP
18	56000001	56050000	0.602463	PRR12
18	56000001	56050000	0.602463	PRRG2
18	56000001	56050000	0.602463	RRAS
18	56000001	56050000	0.602463	SCAF1
1	105860001	105910000	0.602388	OTOL1
29	30160001	30210000	0.602294	KIRREL3
6	58420001	58470000	0.602194	LOC112447070
6	58420001	58470000	0.602194	WDR19
16	50920001	50970000	0.602165	LOC104974460
16	50920001	50970000	0.602165	NADK
16	50920001	50970000	0.602165	SLC35E2
5	106600001	106650000	0.60214	TSPAN9
5	112520001	112570000	0.602028	ACO2
5	112520001	112570000	0.602028	PHF5A
17	52280001	52330000	0.601813	SBNO1
22	53120001	53170000	0.601782	CCR3
22	53120001	53170000	0.601782	LOC529196
7	54480001	54530000	0.601686	NR3C1
11	62300001	62350000	0.601614	UGP2
11	62300001	62350000	0.601614	VPS54
17	52340001	52390000	0.601112	PITPNM2
22	55800001	55850000	0.601077	TAMM41
19	26500001	26550000	0.600751	MINK1
19	26500001	26550000	0.600751	PLD2
10	81460001	81510000	0.60062	LOC104973229
10	81460001	81510000	0.60062	SLC10A1
10	81460001	81510000	0.60062	SRSF5
29	25760001	25810000	0.600425	CSRP3
29	25760001	25810000	0.600425	ZDHHC13
11	340001	390000	0.600354	MERTK
16	50720001	50770000	0.600188	GABRD
7	58200001	58250000	0.600147	TRNAC-GCA
3	120900001	120950000	0.599855	LOC112446054
19	42720001	42770000	0.599814	CCR10
19	42720001	42770000	0.599814	PLEKHH3
19	42720001	42770000	0.599814	TUBG2
12	18700001	18750000	0.599639	TRNAW-CCA
3	120920001	120970000	0.599481	LOC112446163
3	120920001	120970000	0.599481	LOC790134
2	61520001	61570000	0.599299	LCT
2	61520001	61570000	0.599299	MCM6
15	29800001	29850000	0.598836	TRNAG-CCC
22	50040001	50090000	0.598784	IFRD2
22	50040001	50090000	0.598784	LSMEM2
22	50040001	50090000	0.598784	SEMA3B
5	65780001	65830000	0.598543	LOC104972477
14	69460001	69510000	0.598426	CCNE2
14	69460001	69510000	0.598426	INTS8
12	16060001	16110000	0.598166	ZC3H13
22	50120001	50170000	0.598006	GNAT1
22	50120001	50170000	0.598006	SEMA3F
5	107320001	107370000	0.597985	B4GALNT3
5	107320001	107370000	0.597985	LOC112446766
5	107320001	107370000	0.597985	LOC112446858
15	56340001	56390000	0.597271	ACER3
8	720001	770000	0.597227	LOC112447764
2	61540001	61590000	0.597195	UBXN4
22	50300001	50350000	0.59691	LOC112443477
22	50300001	50350000	0.59691	MON1A
5	112340001	112390000	0.596686	EP300
15	29600001	29650000	0.596605	HYOU1
7	15520001	15570000	0.596305	LDLR
7	15520001	15570000	0.596305	LOC112447661
7	49520001	49570000	0.596028	WNT8A
2	114980001	115030000	0.595225	IRS1
2	114980001	115030000	0.595225	RHBDD1
11	73400001	73450000	0.59522	RAB10
5	64400001	64450000	0.594922	NR1H4
18	40060001	40110000	0.594782	HYDIN
11	104600001	104650000	0.594673	VAV2
19	26460001	26510000	0.594257	C19H17orf107
19	26460001	26510000	0.594257	CHRNE
14	34020001	34070000	0.594217	NCOA2
11	73420001	73470000	0.594026	KIF3C
15	29080001	29130000	0.593389	ATP5MG
15	29080001	29130000	0.593389	UBE4A
7	44640001	44690000	0.593364	HSPA4
15	62320001	62370000	0.593337	ELP4
8	59960001	60010000	0.59298	FAM221B
8	59960001	60010000	0.59298	HINT2
8	59960001	60010000	0.59298	NPR2
8	59960001	60010000	0.59298	SPAG8
8	59960001	60010000	0.59298	TMEM8B
19	31360001	31410000	0.59294	ARHGAP44
19	31360001	31410000	0.59294	ELAC2
19	31360001	31410000	0.59294	MIR2339
26	23280001	23330000	0.592815	SFXN2
3	16580001	16630000	0.592691	GATAD2B
3	16580001	16630000	0.592691	INTS3
3	16580001	16630000	0.592691	SLC27A3
8	62900001	62950000	0.592449	XPA
22	55760001	55810000	0.592366	LOC112443495
11	61260001	61310000	0.592149	EHBP1
7	53020001	53070000	0.591897	GNPDA1
28	44360001	44410000	0.591578	ALOX5
22	52780001	52830000	0.591494	ALS2CL
22	52780001	52830000	0.591494	TMIE
18	56020001	56070000	0.591348	BCL2L12
18	56020001	56070000	0.591348	IRF3
12	35220001	35270000	0.591202	LOC101902228
26	23300001	23350000	0.591098	MIR2392
26	23300001	23350000	0.591098	WBP1L
8	83380001	83430000	0.590917	ZNF782
13	58180001	58230000	0.590788	C13H20orf85
22	55320001	55370000	0.590757	ATG7
19	27560001	27610000	0.59028	KCNAB3
23	18240001	18290000	0.590201	SUPT3H
7	90360001	90410000	0.589996	MIR2464
18	12860001	12910000	0.589973	C18H16orf95
12	85980001	86030000	0.589821	SOX1
13	42920001	42970000	0.589812	FAM208B
13	23980001	24030000	0.589753	ARMC3
19	47820001	47870000	0.589738	DCAF7
1	95280001	95330000	0.589606	FNDC3B
14	46280001	46330000	0.589219	EXT1
16	79560001	79610000	0.589186	CACNA1S
16	79560001	79610000	0.589186	KIF21B
26	46860001	46910000	0.589162	DOCK1
18	56340001	56390000	0.58839	IZUMO2
18	56340001	56390000	0.58839	ZNF473
18	56040001	56090000	0.587937	ADM5
18	56040001	56090000	0.587937	LOC101905357
18	56040001	56090000	0.587937	PRMT1
20	3580001	3630000	0.587799	SMIM23
8	53280001	53330000	0.587514	VPS13A
19	37920001	37970000	0.587436	LOC104975073
1	90140001	90190000	0.587327	TBL1XR1
19	38940001	38990000	0.587244	GPR179
19	38940001	38990000	0.587244	MRPL45
12	85880001	85930000	0.58711	LOC112449147
8	59980001	60030000	0.587061	LOC529284
3	100360001	100410000	0.586986	GPBP1L1
3	100360001	100410000	0.586986	IPP
3	100360001	100410000	0.586986	TMEM69
19	42520001	42570000	0.586976	CAVIN1
22	44500001	44550000	0.586962	LOC104975557
22	44500001	44550000	0.586962	MIR2371
19	47760001	47810000	0.586896	CYB561
19	47760001	47810000	0.586896	LOC112442683
19	47760001	47810000	0.586896	TANC2
2	15680001	15730000	0.586854	UBE2E3
2	124820001	124870000	0.586688	LOC112443648
2	124820001	124870000	0.586688	LOC112443652
2	124820001	124870000	0.586688	LOC112443659
2	124820001	124870000	0.586688	LOC112443669
2	124820001	124870000	0.586688	SNHG12
10	66560001	66610000	0.586671	SMIM27
10	66560001	66610000	0.586671	TRNAC-GCA
16	79620001	79670000	0.586559	ASCL5
7	19940001	19990000	0.586293	PIAS4
13	43420001	43470000	0.586235	LOC112441538
13	43420001	43470000	0.586235	LOC112449293
16	50560001	50610000	0.585675	FAAP20
16	50560001	50610000	0.585675	PRKCZ
16	50560001	50610000	0.585675	SKI
21	23860001	23910000	0.585659	MEX3B
14	69480001	69530000	0.585531	DPY19L4
19	46980001	47030000	0.585456	TLK2
2	125700001	125750000	0.585416	FGR
13	58640001	58690000	0.585196	CTCFL
13	39740001	39790000	0.585002	CFAP61
18	39860001	39910000	0.584941	LOC112442305
1	139240001	139290000	0.584694	BRWD1
6	102140001	102190000	0.584678	LOC112447220
6	102140001	102190000	0.584678	LOC112447223
6	102140001	102190000	0.584678	LOC781224
13	38260001	38310000	0.58456	OVOL2
1	147960001	148010000	0.584514	LOC104971069
16	79660001	79710000	0.584371	TMEM9
19	47080001	47130000	0.584331	MRC2
9	93380001	93430000	0.584282	ARID1B
15	28900001	28950000	0.584197	LOC112441618
15	28900001	28950000	0.584197	MPZL2
3	16440001	16490000	0.584065	CRTC2
3	16440001	16490000	0.584065	DENND4B
3	16440001	16490000	0.584065	SLC39A1
18	49680001	49730000	0.584039	C18H19orf47
18	49680001	49730000	0.584039	PLD3
2	125080001	125130000	0.583921	SESN2
16	79580001	79630000	0.583797	LOC112441774
3	110200001	110250000	0.583606	KIAA0319L
3	110200001	110250000	0.583606	NCDN
14	30300001	30350000	0.583528	LOC104974036
8	62440001	62490000	0.583383	IGFBPL1
8	62440001	62490000	0.583383	LOC507550
26	22780001	22830000	0.583359	LDB1
16	50540001	50590000	0.583263	LOC104974459
20	71260001	71310000	0.582904	NKD2
20	71260001	71310000	0.582904	SLC12A7
10	51600001	51650000	0.582853	ADAM10
22	48240001	48290000	0.582609	SMIM4
13	24700001	24750000	0.58257	KIAA1217
13	24700001	24750000	0.58257	LOC112449393
10	51660001	51710000	0.582416	LIPC
11	860001	910000	0.582332	LOC112448732
7	19860001	19910000	0.582155	CREB3L3
7	19860001	19910000	0.582155	SIRT6
7	15500001	15550000	0.58177	SMARCA4
16	71740001	71790000	0.581531	NEK2
8	60260001	60310000	0.581491	LOC504766
8	60260001	60310000	0.581491	LOC613441
7	49480001	49530000	0.581391	LOC112447619
3	91640001	91690000	0.581385	FAM151A
3	91640001	91690000	0.581385	LOC112446164
3	91640001	91690000	0.581385	LOC615989
3	91640001	91690000	0.581385	TRNAP-AGG
16	4880001	4930000	0.581335	C4BPB
16	4880001	4930000	0.581335	TRNAE-CUC
26	10540001	10590000	0.581295	ANKRD22
26	10540001	10590000	0.581295	STAMBPL1
11	64480001	64530000	0.581271	LOC112448878
7	39460001	39510000	0.581182	COL23A1
19	38580001	38630000	0.580992	LRRC46
19	38580001	38630000	0.580992	SCRN2
19	38580001	38630000	0.580992	SP6
19	27240001	27290000	0.580825	LOC112442635
19	27240001	27290000	0.580825	POLR2A
19	27240001	27290000	0.580825	TNFSF12
13	57440001	57490000	0.580776	GNAS
13	57440001	57490000	0.580776	LOC101909083
13	57440001	57490000	0.580776	LOC112449314
13	57440001	57490000	0.580776	LOC112449315
13	43400001	43450000	0.58055	LOC782061
11	104060001	104110000	0.580253	AGPAT2
11	104060001	104110000	0.580253	EGFL7
11	104060001	104110000	0.580253	LOC101902839
11	104060001	104110000	0.580253	MIR126
19	48040001	48090000	0.580044	DDX42
19	48040001	48090000	0.580044	FTSJ3
19	48040001	48090000	0.580044	PSMC5
19	48040001	48090000	0.580044	SMARCD2
16	39600001	39650000	0.579986	DNM3
16	39600001	39650000	0.579986	MIR199A-1
16	39600001	39650000	0.579986	MIR214
16	39600001	39650000	0.579986	MIR3120
29	46520001	46570000	0.579619	LOC112444899
13	9000001	9050000	0.579555	MACROD2
4	63020001	63070000	0.579476	MIR1814C
19	40520001	40570000	0.579395	CDC6
19	40520001	40570000	0.579395	RARA
19	40520001	40570000	0.579395	WIPF2
23	17520001	17570000	0.578999	LOC112443919
2	127100001	127150000	0.578687	PAFAH2
2	127100001	127150000	0.578687	TRNAE-UUC
24	34420001	34470000	0.578249	MIB1
24	34420001	34470000	0.578249	MIR1-2
24	34420001	34470000	0.578249	MIR133A-2
1	144280001	144330000	0.578172	AIRE
1	144280001	144330000	0.578172	PFKL
19	27160001	27210000	0.578049	LOC112442634
19	38200001	38250000	0.577751	LOC112442655
5	90840001	90890000	0.577564	PLEKHA5
15	61380001	61430000	0.577521	LOC112441584
10	65740001	65790000	0.577001	DDHD1
15	28480001	28530000	0.57658	FXYD2
15	28480001	28530000	0.57658	FXYD6
15	28480001	28530000	0.57658	LOC101909375
3	68060001	68110000	0.576491	ST6GALNAC3
3	91820001	91870000	0.576262	LOC112446011
29	49500001	49550000	0.57603	H19
29	49500001	49550000	0.57603	LOC112444916
29	49500001	49550000	0.57603	MRPL23
2	97060001	97110000	0.575865	LOC616092
11	73380001	73430000	0.575819	TRNAC-ACA
28	34520001	34570000	0.575807	LOC112444771
16	55140001	55190000	0.575798	CENPL
16	55140001	55190000	0.575798	KLHL20

## Sheet: Sheet9
Table S9. A summary of genes from θπ ratio.
Chrom	Starting position	Ending position	θπ ratio	Gene
3	54700001	54750000	6.54352	LOC112445998
3	54700001	54750000	6.54352	LOC507055
3	54700001	54750000	6.54352	LOC511531
3	54420001	54470000	6.46392	GBP4
3	54420001	54470000	6.46392	LOC781710
5	59100001	59150000	5.44638	LOC788258
12	70920001	70970000	4.26039	LOC100336232
15	44880001	44930000	4.06838	LOC516263
15	44880001	44930000	4.06838	LOC782678
7	10100001	10150000	3.99243	LOC785898
7	10080001	10130000	3.65119	LOC100295735
3	54580001	54630000	3.38177	GBP6
3	54580001	54630000	3.38177	LOC112445997
3	54760001	54810000	3.36418	LOC785445
3	54660001	54710000	3.29606	LOC100336669
7	10020001	10070000	3.15344	LOC100295806
15	79260001	79310000	2.9148	LOC508180
15	79260001	79310000	2.9148	LOC615824
15	79260001	79310000	2.9148	OR8J1
23	25580001	25630000	2.8082	BOLA-DQA2
23	25580001	25630000	2.8082	BOLA-DQB
12	72180001	72230000	2.74277	LOC100337108
12	72180001	72230000	2.74277	LOC112449109
12	72040001	72090000	2.591	LOC100337076
15	79100001	79150000	2.50018	LOC519317
15	79100001	79150000	2.50018	LOC528502
15	79100001	79150000	2.50018	LOC782841
15	79100001	79150000	2.50018	LOC782913
7	9980001	10030000	2.45819	LOC112447331
7	9980001	10030000	2.45819	LOC788031
5	102860001	102910000	2.12841	LOC112446749
5	102860001	102910000	2.12841	LOC112446750
5	102860001	102910000	2.12841	WC1-8
7	10120001	10170000	2.12485	LOC512488
7	10120001	10170000	2.12485	LOC786840
7	10780001	10830000	2.1106	LOC100299045
7	10780001	10830000	2.1106	LOC100300051
5	58020001	58070000	2.06824	LOC782430
15	79160001	79210000	1.9861	LOC112441588
15	79160001	79210000	1.9861	LOC528577
15	79160001	79210000	1.9861	LOC785944
23	26360001	26410000	1.83771	LOC101903211
15	79240001	79290000	1.76345	LOC507377
15	79240001	79290000	1.76345	OR8K1
5	65520001	65570000	1.76125	CHPT1
5	65520001	65570000	1.76125	SYCP3
23	26320001	26370000	1.74309	LOC107131258
5	65500001	65550000	1.74039	MYBPC1
27	6880001	6930000	1.70003	LOC112444647
15	79300001	79350000	1.60058	LOC785406
29	5480001	5530000	1.45304	LOC100337032
5	65540001	65590000	1.419	GNPTAB
15	44860001	44910000	1.36711	LOC531779
15	44860001	44910000	1.36711	LOC782645
2	61480001	61530000	1.35621	MCM6
16	5860001	5910000	1.326	LOC112441815
12	72420001	72470000	1.26663	LOC112449072
15	79120001	79170000	1.26617	LOC514057
15	79120001	79170000	1.26617	LOC614985
15	44900001	44950000	1.25458	LOC782791
27	6960001	7010000	1.23256	DEFB
10	23200001	23250000	1.23018	LOC100298434
10	23200001	23250000	1.23018	LOC100336282
10	23200001	23250000	1.23018	LOC107132831
10	23200001	23250000	1.23018	LOC407205
5	102000001	102050000	1.21887	WC-7
12	72720001	72770000	1.18615	LOC100337390
7	48660001	48710000	1.1592	SPOCK1
16	5960001	6010000	1.13052	LOC101905630
10	75160001	75210000	1.12452	KCNH5
18	61420001	61470000	1.10032	LOC100300449
27	34300001	34350000	1.06142	ADAM32
29	10460001	10510000	1.01291	DLG2
8	59400001	59450000	0.99363	UNC13B
3	97840001	97890000	0.981835	SPATA6
5	58000001	58050000	0.97862	LOC100140445
5	58000001	58050000	0.97862	LOC112446906
19	28080001	28130000	0.977795	MYH10
13	69740001	69790000	0.976688	LOC101907320
13	69740001	69790000	0.976688	LOC112449431
13	69740001	69790000	0.976688	LOC112449434
13	69740001	69790000	0.976688	TOP1
18	56340001	56390000	0.963398	IZUMO2
18	56340001	56390000	0.963398	ZNF473
23	21740001	21790000	0.947123	LOC613394
23	21740001	21790000	0.947123	LOC781635
4	105940001	105990000	0.946644	LOC100300510
4	105940001	105990000	0.946644	LOC100336982
4	105940001	105990000	0.946644	LOC100336993
4	105940001	105990000	0.946644	LOC101902874
4	105940001	105990000	0.946644	LOC104968514
4	105940001	105990000	0.946644	LOC112446435
4	105940001	105990000	0.946644	LOC509513
3	54320001	54370000	0.941282	LOC112445995
21	43500001	43550000	0.938287	NPAS3
14	13480001	13530000	0.937667	LOC112449611
15	47220001	47270000	0.934568	OR52E6
15	47220001	47270000	0.934568	OR52N2
7	42800001	42850000	0.922368	LOC614592
7	42800001	42850000	0.922368	LOC789041
18	56320001	56370000	0.908332	VRK3
14	40001	90000	0.904334	LOC112449588
14	40001	90000	0.904334	LOC112449589
14	40001	90000	0.904334	LOC112449638
7	52260001	52310000	0.896271	LOC100848138
7	52260001	52310000	0.896271	LOC107131225
7	52260001	52310000	0.896271	LOC786489
7	52260001	52310000	0.896271	LOC786512
7	52260001	52310000	0.896271	LOC787102
7	52260001	52310000	0.896271	PCDHB8
16	6280001	6330000	0.895638	CFH
1	111740001	111790000	0.894924	GMPS
26	38580001	38630000	0.886705	FAM204A
5	59240001	59290000	0.884253	LOC788357
5	59240001	59290000	0.884253	LOC788372
7	52180001	52230000	0.88024	LOC104968820
7	52180001	52230000	0.88024	LOC616427
4	105920001	105970000	0.876206	LOC101903933
4	105920001	105970000	0.876206	LOC112446439
14	31260001	31310000	0.873997	CSPP1
5	102020001	102070000	0.872514	LOC112446753
16	8140001	8190000	0.863025	LOC100848559
16	8140001	8190000	0.863025	LOC112441780
8	280001	330000	0.861616	MFSD14B
16	19440001	19490000	0.856484	USH2A
10	48060001	48110000	0.828584	VPS13C
16	9660001	9710000	0.828502	TRNAK-UUU
10	26000001	26050000	0.824817	ARHGEF40
10	26000001	26050000	0.824817	LOC100300237
10	26000001	26050000	0.824817	LOC104973100
10	26000001	26050000	0.824817	RNASE13
10	26000001	26050000	0.824817	ZNF219
23	29840001	29890000	0.821805	LOC509280
23	29840001	29890000	0.821805	OR2J2
14	31280001	31330000	0.820051	ARFGEF1
15	62460001	62510000	0.81073	ELP4
18	56360001	56410000	0.80935	LOC104974912
7	52160001	52210000	0.798378	LOC107132640
7	52160001	52210000	0.798378	PCDHB1
20	48840001	48890000	0.790569	CDH10
5	57880001	57930000	0.786907	LOC782591
5	57880001	57930000	0.786907	LOC782624
20	33620001	33670000	0.776093	CARD6
20	33620001	33670000	0.776093	LOC112443039
20	33620001	33670000	0.776093	RPL37
13	69720001	69770000	0.774805	LOC112449423
5	28260001	28310000	0.771881	LOC112446848
5	28260001	28310000	0.771881	SLC4A8
18	7480001	7530000	0.771092	CDYL2
16	63940001	63990000	0.770544	SHCBP1L
3	105900001	105950000	0.769535	RLF
5	58440001	58490000	0.763538	LOC507560
5	58440001	58490000	0.763538	OR6C68
16	8880001	8930000	0.762245	LOC789494
21	22100001	22150000	0.757917	IQGAP1
12	32300001	32350000	0.75259	LNX2
12	32300001	32350000	0.75259	POLR1D
26	16240001	16290000	0.75009	LOC540627
18	16460001	16510000	0.749985	ABCC12
8	60360001	60410000	0.725033	LOC112447928
8	60360001	60410000	0.725033	RECK
16	5840001	5890000	0.722011	LOC112441501
18	44580001	44630000	0.721825	LSM14A
29	12540001	12590000	0.718963	RAB30
5	113740001	113790000	0.713225	PACSIN2
3	53380001	53430000	0.709049	LRRC8D
3	53380001	53430000	0.709049	MIR2285K-5
10	80900001	80950000	0.708659	DCAF5
29	9880001	9930000	0.708227	CREBZF
29	9880001	9930000	0.708227	LOC112444923
29	9880001	9930000	0.708227	TMEM126A
29	9880001	9930000	0.708227	TMEM126B
5	57700001	57750000	0.705681	LOC100847112
5	57700001	57750000	0.705681	LOC615284
5	57700001	57750000	0.705681	LOC618816
5	57860001	57910000	0.705499	LOC529303
6	60001	110000	0.704424	LOC112447203
5	99160001	99210000	0.696481	LOC100140174
13	24680001	24730000	0.694483	KIAA1217
1	56800001	56850000	0.69255	TMPRSS7
1	137080001	137130000	0.691096	DNAJC13
27	7180001	7230000	0.690549	EBD
27	7180001	7230000	0.690549	LOC100848114
27	7180001	7230000	0.690549	LOC112444644
27	7180001	7230000	0.690549	LOC112444646
27	7200001	7250000	0.688931	LOC101901964
27	7200001	7250000	0.688931	LOC112444616
26	38480001	38530000	0.683269	LOC112444511
19	26420001	26470000	0.681014	CAMTA2
19	26420001	26470000	0.681014	ENO3
19	26420001	26470000	0.681014	GP1BA
19	26420001	26470000	0.681014	LOC100848357
19	26420001	26470000	0.681014	PFN1
19	26420001	26470000	0.681014	RNF167
19	26420001	26470000	0.681014	SLC25A11
19	26420001	26470000	0.681014	SPAG7
3	51280001	51330000	0.675476	BTBD8
3	51280001	51330000	0.675476	LOC104971636
5	58060001	58110000	0.675215	LOC782338
7	42820001	42870000	0.671299	LOC785149
27	7220001	7270000	0.668277	LOC101907165
5	89220001	89270000	0.668082	PDE3A
13	43300001	43350000	0.665695	LOC112449294
13	43300001	43350000	0.665695	LOC112449296
13	43300001	43350000	0.665695	LOC782061
12	24500001	24550000	0.662639	LOC112449048
24	61800001	61850000	0.662181	LOC511695
24	61800001	61850000	0.662181	SERPINB12
19	28060001	28110000	0.661649	NDEL1
21	22540001	22590000	0.660977	SLC28A1
15	79180001	79230000	0.659116	LOC507253
5	113760001	113810000	0.658433	LOC101904078
18	34680001	34730000	0.654071	CBFB
18	34680001	34730000	0.654071	CES4A
20	33660001	33710000	0.651045	PRKAA1
20	33660001	33710000	0.651045	TTC33
13	11120001	11170000	0.648068	LOC112449360
13	11120001	11170000	0.648068	LOC112449361
13	11120001	11170000	0.648068	LOC505099
13	11120001	11170000	0.648068	TRNAC-GCA
3	92240001	92290000	0.641167	HSPB11
3	92240001	92290000	0.641167	LRRC42
23	29820001	29870000	0.638464	LOC788663
23	29820001	29870000	0.638464	LOC788675
7	57940001	57990000	0.635882	PPP2R2B
21	59000001	59050000	0.63528	SERPINA6
27	34280001	34330000	0.634475	TRNAR-ACG
7	10140001	10190000	0.631728	LOC513101
10	26200001	26250000	0.626631	LOC517093
10	26200001	26250000	0.626631	RNASE1
13	69660001	69710000	0.626583	LOC112449380
17	51660001	51710000	0.62321	LOC100847522
5	99320001	99370000	0.621808	LOC100847738
5	99320001	99370000	0.621808	LOC101905165
5	99320001	99370000	0.621808	LOC104970137
23	25600001	25650000	0.620127	BOLA-DQA5
5	102040001	102090000	0.61845	LOC751788
13	69760001	69810000	0.618059	PLCG1
13	23760001	23810000	0.616148	PIP4K2A
7	52340001	52390000	0.61295	LOC786553
7	52340001	52390000	0.61295	PCDHB11
15	45820001	45870000	0.612257	LOC112441696
15	45820001	45870000	0.612257	LOC510100
15	45820001	45870000	0.612257	LOC783518
15	45820001	45870000	0.612257	LOC790683
11	60480001	60530000	0.605559	COMMD1
21	22080001	22130000	0.601355	CRTC3
7	10220001	10270000	0.598563	LOC100138633
7	10220001	10270000	0.598563	LOC785981
5	112120001	112170000	0.598551	DNAJB7
5	112120001	112170000	0.598551	RBX1
5	112120001	112170000	0.598551	XPNPEP3
24	61820001	61870000	0.598474	LOC112444161
24	61820001	61870000	0.598474	LOC786348
1	146700001	146750000	0.598423	LOC101902630
1	146700001	146750000	0.598423	LOC101902902
23	26800001	26850000	0.596189	LOC100847986
23	26800001	26850000	0.596189	LOC112443747
1	152040001	152090000	0.591542	LOC112448102
21	22380001	22430000	0.590395	LOC112443242
21	22380001	22430000	0.590395	ZNF592
3	53200001	53250000	0.585575	ZNF326
16	63920001	63970000	0.574239	DHX9
4	105960001	106010000	0.573942	LOC101902921
5	59000001	59050000	0.568935	LOC112446614
5	59000001	59050000	0.568935	LOC788210
5	59000001	59050000	0.568935	LOC788220
9	39260001	39310000	0.56837	SLC16A10
17	14340001	14390000	0.566363	SMARCA5
2	51440001	51490000	0.565853	LOC104971220
22	44840001	44890000	0.564425	ERC2
16	5100001	5150000	0.559605	LOC515150
3	51980001	52030000	0.559078	HFM1
10	23220001	23270000	0.553988	LOC407201
16	6140001	6190000	0.553335	LOC781004
3	103940001	103990000	0.551678	FOXJ3
5	58480001	58530000	0.549219	OR6C76
3	50460001	50510000	0.543036	FAM69A
3	92440001	92490000	0.54063	GLIS1
3	92440001	92490000	0.54063	NDC1
10	25920001	25970000	0.539529	HNRNPC
10	25920001	25970000	0.539529	OR5AU1
16	6360001	6410000	0.538081	KCNT2
3	51300001	51350000	0.53791	EPHX4
5	99340001	99390000	0.537557	LOC100336869
28	28740001	28790000	0.530875	MCU
3	97900001	97950000	0.52953	TRNAT-AGU
9	39600001	39650000	0.525112	CDK19
9	39600001	39650000	0.525112	LOC112448039
17	51640001	51690000	0.524409	LOC112442035
12	70780001	70830000	0.521337	LOC523431
19	36780001	36830000	0.520178	KAT7
19	36780001	36830000	0.520178	LOC104975064
19	36780001	36830000	0.520178	TAC4
25	24620001	24670000	0.519833	LOC112444347
24	61940001	61990000	0.519311	SERPINB11
13	11080001	11130000	0.518731	LOC112449356
13	11080001	11130000	0.518731	LOC112449366
13	47740001	47790000	0.516604	GPCPD1
5	58260001	58310000	0.514245	LOC787518
5	58260001	58310000	0.514245	LOC787535
6	5680001	5730000	0.513117	LOC112447030
6	5680001	5730000	0.513117	TRNAG-CCC
7	10240001	10290000	0.506959	LOC786119
3	93880001	93930000	0.506315	ZCCHC11
4	44520001	44570000	0.506123	DNAJC2
4	44520001	44570000	0.506123	PMPCB
4	44520001	44570000	0.506123	PSMC2
13	24340001	24390000	0.505127	OTUD1
7	10360001	10410000	0.504856	LOC512956
7	10360001	10410000	0.504856	LOC786202
25	26600001	26650000	0.502858	SEPHS2
25	26600001	26650000	0.502858	TRNAR-UCG
25	26600001	26650000	0.502858	TRNAR-UCG
25	26600001	26650000	0.502858	TRNAR-UCG
7	52360001	52410000	0.497861	SLC25A2
7	52360001	52410000	0.497861	TAF7
2	61380001	61430000	0.495112	DARS
1	44820001	44870000	0.492914	LOC529036
1	95440001	95490000	0.492699	FNDC3B
1	95440001	95490000	0.492699	LOC101904810
1	136980001	137030000	0.491289	ACAD11
1	136980001	137030000	0.491289	ACKR4
25	35460001	35510000	0.48908	CLDN15
25	35460001	35510000	0.48908	FIS1
25	35460001	35510000	0.48908	LOC618076
25	35460001	35510000	0.48908	PLOD3
25	35460001	35510000	0.48908	ZNHIT1
24	61920001	61970000	0.488994	LOC511106
15	61800001	61850000	0.488109	DCDC1
22	46640001	46690000	0.485585	CACNA2D3
7	44540001	44590000	0.483554	AFF4
7	44540001	44590000	0.483554	LOC112447663
7	44540001	44590000	0.483554	ZCCHC10
2	43380001	43430000	0.482661	ARL6IP6
18	56380001	56430000	0.475985	MYH14
8	60140001	60190000	0.475966	LOC112447751
8	60140001	60190000	0.475966	LOC506202
8	60140001	60190000	0.475966	LOC784108
8	60140001	60190000	0.475966	LOC784185
8	60140001	60190000	0.475966	OR13J1
23	29860001	29910000	0.475646	LOC112443742
23	29860001	29910000	0.475646	LOC782475
23	29860001	29910000	0.475646	OR2W1
7	58420001	58470000	0.474243	STK32A
23	29920001	29970000	0.473323	LOC112443713
23	29920001	29970000	0.473323	LOC782554
13	360001	410000	0.472633	LOC101905258
13	24700001	24750000	0.468399	LOC112449393
10	81140001	81190000	0.468154	ERH
10	81140001	81190000	0.468154	GALNT16
10	81140001	81190000	0.468154	SLC39A9
27	6700001	6750000	0.466336	DEFB1
23	12120001	12170000	0.465541	BTBD9
27	7140001	7190000	0.462768	DEFB4A
5	99200001	99250000	0.459235	LOC112446743
8	83440001	83490000	0.45895	ZNF782
25	24640001	24690000	0.458655	C25H16orf82
26	16280001	16330000	0.451616	LOC100847963
1	58580001	58630000	0.449266	GRAMD1C
1	58580001	58630000	0.449266	ZDHHC23
7	10200001	10250000	0.449215	LOC785946
21	22320001	22370000	0.448062	SEC11A
21	22280001	22330000	0.447262	NMB
21	22280001	22330000	0.447262	WDR73
21	22280001	22330000	0.447262	ZSCAN2
13	48000001	48050000	0.44603	SHLD1
15	79620001	79670000	0.445792	LOC100300446
15	79620001	79670000	0.445792	LOC100300488
15	79620001	79670000	0.445792	LOC100336916
16	4960001	5010000	0.445207	C4BPA
16	4960001	5010000	0.445207	LOC506707
12	71960001	72010000	0.442162	TRNAC-GCA
7	52460001	52510000	0.441612	LOC101904103
7	52460001	52510000	0.441612	PCDHGA2
7	52460001	52510000	0.441612	PCDHGA8
7	52460001	52510000	0.441612	PCDHGB4
19	28160001	28210000	0.440861	LOC112442832
26	22600001	22650000	0.439242	ARMH3
8	60120001	60170000	0.439034	LOC100337274
8	60120001	60170000	0.439034	LOC112447886
3	93460001	93510000	0.438994	ECHDC2
3	93460001	93510000	0.438994	ZYG11A
5	58420001	58470000	0.438673	LOC100140428
7	10960001	11010000	0.435334	LOC112447333
13	43580001	43630000	0.434991	AKR1C3
13	43580001	43630000	0.434991	AKR1C4
13	43580001	43630000	0.434991	LOC100140487
13	43580001	43630000	0.434991	LOC107131369
3	93240001	93290000	0.433216	SCP2
16	4920001	4970000	0.432662	C4BPB
29	2480001	2530000	0.425799	FAT3
23	26480001	26530000	0.42571	LOC112443861
24	26020001	26070000	0.423591	DSC2
7	31000001	31050000	0.422985	SNX2
16	5780001	5830000	0.422965	LOC112441814
16	5780001	5830000	0.422965	LOC514121
29	26740001	26790000	0.42247	LOC100299628
29	26740001	26790000	0.42247	LOC100301071
29	26740001	26790000	0.42247	LOC100336852
4	45900001	45950000	0.422159	LHFPL3
3	53400001	53450000	0.42158	LOC112445993
10	25860001	25910000	0.421125	RPGRIP1
3	51480001	51530000	0.42109	TGFBR3
13	47760001	47810000	0.420399	LOC513580
4	92080001	92130000	0.419641	SND1
21	22500001	22550000	0.418644	ALPK3
27	34200001	34250000	0.41806	ADAM9
5	47800001	47850000	0.417428	HMGA2
3	34360001	34410000	0.416353	CLCC1
3	34360001	34410000	0.416353	WDR47
26	38320001	38370000	0.415046	LOC112444480
7	52740001	52790000	0.413189	ARAP3
7	52740001	52790000	0.413189	FCHSD1
3	80480001	80530000	0.407052	JAK1
13	10720001	10770000	0.404573	NINL
8	780001	830000	0.403029	PALLD
15	80640001	80690000	0.4013	LOC520402
15	80640001	80690000	0.4013	SLC43A3
1	56900001	56950000	0.400954	C1H3orf52
1	56900001	56950000	0.400954	GCSAM
5	112100001	112150000	0.400595	ST13
4	28520001	28570000	0.400036	TMEM196
1	136900001	136950000	0.398938	UBA5
7	42740001	42790000	0.398928	LOC104972393
7	42740001	42790000	0.398928	LOC789031
19	26400001	26450000	0.397166	INCA1
19	26400001	26450000	0.397166	KIF1C
20	31540001	31590000	0.396493	LOC112443002
20	31540001	31590000	0.396493	LOC112443080
20	31540001	31590000	0.396493	NIM1K
20	31540001	31590000	0.396493	ZNF131
1	139660001	139710000	0.396039	B3GALT5
18	44720001	44770000	0.395051	KIAA0355
13	73400001	73450000	0.394963	STK4
8	60380001	60430000	0.393727	GLIPR2
3	105880001	105930000	0.391971	TMCO2
8	35800001	35850000	0.389622	LOC101904827
3	34200001	34250000	0.389603	KIAA1324
11	2860001	2910000	0.389279	FAM178B
10	25940001	25990000	0.388512	TMEM253
17	14320001	14370000	0.387781	FREM3
13	22320001	22370000	0.38703	NEBL
5	71320001	71370000	0.386821	SYN3
7	52720001	52770000	0.385259	HDAC3
7	52720001	52770000	0.385259	RELL2
25	25300001	25350000	0.38492	GSG1L
25	25300001	25350000	0.38492	KIAA0556
2	61500001	61550000	0.384004	LCT
8	760001	810000	0.383507	LOC112447764
1	135780001	135830000	0.382827	TOPBP1
15	42480001	42530000	0.382037	SBF2
1	148440001	148490000	0.380719	CBR3
1	148440001	148490000	0.380719	DOPEY2
9	39280001	39330000	0.379562	LOC112448182
9	39280001	39330000	0.379562	RPF2
8	59360001	59410000	0.378667	FAM214B
8	59360001	59410000	0.378667	STOML2
3	101680001	101730000	0.376771	ERI3
3	101680001	101730000	0.376771	MIR2414
7	21740001	21790000	0.3764	LOC112447377
7	21740001	21790000	0.3764	RAD50
15	79640001	79690000	0.376369	LOC100299725
17	51680001	51730000	0.374841	LOC101904642
17	51680001	51730000	0.374841	ZNF664
23	27680001	27730000	0.374065	AIF1
23	27680001	27730000	0.374065	LOC100847561
23	27680001	27730000	0.374065	LOC112443855
23	27680001	27730000	0.374065	LST1
23	27680001	27730000	0.374065	LTA
23	27680001	27730000	0.374065	LTB
23	27680001	27730000	0.374065	NCR3
23	27680001	27730000	0.374065	TNF
8	85140001	85190000	0.371879	LOC101907579
4	92100001	92150000	0.370666	LRRC4
11	2960001	3010000	0.369451	ACTR1B
11	2960001	3010000	0.369451	C11H2orf92
22	56020001	56070000	0.36804	MIR2372
22	56020001	56070000	0.36804	TMCC1
11	3520001	3570000	0.367408	VWA3B
19	33300001	33350000	0.366284	LOC104975044
19	33300001	33350000	0.366284	NCOR1
19	33300001	33350000	0.366284	PIGL
29	48560001	48610000	0.365958	CARS
13	40120001	40170000	0.365704	RALGAPA2
18	62680001	62730000	0.364749	KIR3DL2
18	62680001	62730000	0.364749	KIR3DS1
18	62680001	62730000	0.364749	LOC100852061
3	45640001	45690000	0.363994	DPYD
7	52280001	52330000	0.363356	LOC100848799
7	52280001	52330000	0.363356	PCDHB14
2	111480001	111530000	0.363092	LOC112443698
13	11160001	11210000	0.362578	LOC112449367
25	35340001	35390000	0.360612	COL26A1
25	35340001	35390000	0.360612	LOC104970468
7	8900001	8950000	0.360386	LOC100298119
7	8900001	8950000	0.360386	LOC512948
14	45420001	45470000	0.36027	LOC101905780
12	39580001	39630000	0.35962	PCDH9
27	34720001	34770000	0.358218	ADAM3A
17	14020001	14070000	0.35562	GYPA
11	25000001	25050000	0.354764	MTA3
22	22020001	22070000	0.352835	SETMAR
15	56420001	56470000	0.352592	B3GNT6
13	43440001	43490000	0.352204	LOC112441538
13	43440001	43490000	0.352204	LOC112449293
13	43440001	43490000	0.352204	LOC785762
16	33480001	33530000	0.351245	AKT3
4	112880001	112930000	0.350609	GIMAP7
3	93900001	93950000	0.349733	PRPF38A
22	24020001	24070000	0.349494	CNTN4
8	60480001	60530000	0.349114	CLTA
8	60480001	60530000	0.349114	GNE
5	27040001	27090000	0.346161	KRT78
5	27040001	27090000	0.346161	KRT8
23	31080001	31130000	0.345938	MIR7857
23	31080001	31130000	0.345938	TRNAD-GUC
23	31080001	31130000	0.345938	TRNAK-UUU
23	31080001	31130000	0.345938	TRNAK-UUU
23	31080001	31130000	0.345938	TRNAL-CAA
23	31080001	31130000	0.345938	TRNAL-CAA
23	31080001	31130000	0.345938	TRNAL-CAA
23	31080001	31130000	0.345938	TRNAM-CAU
23	31080001	31130000	0.345938	TRNAM-CAU
23	31080001	31130000	0.345938	TRNAQ-CUG
23	31080001	31130000	0.345938	TRNAR-UCU
23	31080001	31130000	0.345938	TRNAS-AGA
23	31080001	31130000	0.345938	TRNAS-AGA
23	31080001	31130000	0.345938	TRNAS-AGA
23	31080001	31130000	0.345938	TRNAS-AGA
23	31080001	31130000	0.345938	TRNAS-UGA
5	58120001	58170000	0.34556	LOC782220
14	38800001	38850000	0.345337	HNF4G
26	16220001	16270000	0.345159	LOC112444508
13	11040001	11090000	0.344026	LOC101906082
20	66700001	66750000	0.343346	UBE2QL1
15	2300001	2350000	0.34256	GRIA4
3	98220001	98270000	0.340288	LOC112446157
10	26180001	26230000	0.339734	LOC112448555
5	43860001	43910000	0.339599	CCT2
5	43860001	43910000	0.339599	FRS2
5	43860001	43910000	0.339599	LRRC10
5	43860001	43910000	0.339599	MIR2427
20	20340001	20390000	0.338411	LOC112443031
10	26700001	26750000	0.337791	KLHL33
10	26700001	26750000	0.337791	TEP1
5	112280001	112330000	0.337382	EP300
5	112280001	112330000	0.337382	LOC112446777
5	112280001	112330000	0.337382	MIR1281
10	26220001	26270000	0.33557	BRB
3	63100001	63150000	0.332296	ADGRL2
21	22400001	22450000	0.332123	MIR2364
9	43400001	43450000	0.331997	CRYBG1
27	6720001	6770000	0.331827	LOC112444643
25	26620001	26670000	0.331021	ITGAL
23	27700001	27750000	0.330621	ATP6V1G2
23	27700001	27750000	0.330621	DDX39B
23	27700001	27750000	0.330621	LOC112443897
23	27700001	27750000	0.330621	NFKBIL1
16	19320001	19370000	0.330264	TRNAC-ACA
7	10260001	10310000	0.328386	LOC786149
3	51040001	51090000	0.327391	RPAP2
11	2940001	2990000	0.326626	COX5B
23	17100001	17150000	0.324286	GTPBP2
23	17100001	17150000	0.324286	POLH
23	17100001	17150000	0.324286	XPO5
4	44500001	44550000	0.324091	ARMC10
4	44500001	44550000	0.324091	NAPEPLD
13	34720001	34770000	0.323274	SVIL
15	79600001	79650000	0.322228	LOC100336901
4	42360001	42410000	0.32204	MAGI2
5	65300001	65350000	0.321435	SPIC
10	22920001	22970000	0.320922	LOC107132829
18	61460001	61510000	0.319753	LOC789418
10	23240001	23290000	0.319026	LOC107132832
10	23240001	23290000	0.319026	LOC112448412
28	34500001	34550000	0.318023	LOC112444769
18	34660001	34710000	0.317349	CES3
5	27060001	27110000	0.316513	KRT79
19	33680001	33730000	0.315626	SPECC1
15	47200001	47250000	0.314849	LOC613909
15	47200001	47250000	0.314849	OR52E8
5	29060001	29110000	0.313176	ATF1
5	29060001	29110000	0.313176	TMPRSS12
3	100860001	100910000	0.312275	ZSWIM5
3	11720001	11770000	0.312059	LOC509005
3	11720001	11770000	0.312059	LOC781726
2	53080001	53130000	0.312032	ARHGAP15
5	66020001	66070000	0.31145	PARPBP
5	66020001	66070000	0.31145	PMCH
14	36100001	36150000	0.311355	KCNB2
5	90480001	90530000	0.308581	AEBP2
25	35700001	35750000	0.308047	LOC107131854
25	35700001	35750000	0.308047	LOC112444283
25	35700001	35750000	0.308047	MUC3A
11	47200001	47250000	0.307955	LOC100294952
11	47200001	47250000	0.307955	LOC112448784
23	31100001	31150000	0.307925	TRNAD-GUC
23	31100001	31150000	0.307925	TRNAQ-CUG
23	31100001	31150000	0.307925	TRNAS-AGA
23	31100001	31150000	0.307925	TRNAS-AGA
23	31100001	31150000	0.307925	TRNAS-UGA
7	53800001	53850000	0.30743	ARHGAP26
1	52420001	52470000	0.306643	BBX
23	25420001	25470000	0.30629	ELOVL5
2	89080001	89130000	0.305696	AOX1
2	89080001	89130000	0.305696	SGO2
2	88080001	88130000	0.305551	LOC112443725
29	5500001	5550000	0.305388	LOC112444838
29	5500001	5550000	0.305388	LOC530556
1	136840001	136890000	0.304519	NPHP3
23	26220001	26270000	0.303932	LOC104969894
11	3820001	3870000	0.30267	COA5
11	3820001	3870000	0.30267	MGAT4A
11	3820001	3870000	0.30267	UNC50
13	22740001	22790000	0.302365	MLLT10
7	8960001	9010000	0.302112	LOC507378
11	73200001	73250000	0.301301	ADGRF3
11	73200001	73250000	0.301301	HADHB
7	44740001	44790000	0.300484	LOC112447570
23	17120001	17170000	0.298834	MAD2L1BP
23	17120001	17170000	0.298834	RSPH9
23	26920001	26970000	0.298449	C23H6orf10
8	23360001	23410000	0.297603	HACD4
8	23360001	23410000	0.297603	LOC112447789
5	103080001	103130000	0.297517	CD163L1
12	19000001	19050000	0.29611	CAB39L
12	19000001	19050000	0.29611	SETDB2
15	54220001	54270000	0.294869	NEU3
15	54220001	54270000	0.294869	SPCS2
15	54220001	54270000	0.294869	XRRA1
10	25040001	25090000	0.294749	LOC100298992
10	25040001	25090000	0.294749	LOC100848817
10	25040001	25090000	0.294749	LOC785309
7	44560001	44610000	0.294668	HSPA4
10	24960001	25010000	0.294062	LOC112448420
7	52400001	52450000	0.293627	LOC100848177
13	43220001	43270000	0.292497	UCN3
7	40460001	40510000	0.291734	IFI47
7	40460001	40510000	0.291734	LOC509006
23	27660001	27710000	0.291457	LOC112443906
23	27660001	27710000	0.291457	PRRC2A
23	27840001	27890000	0.291407	BOLA
23	27840001	27890000	0.291407	BoLA
23	27840001	27890000	0.291407	MIC1
4	105900001	105950000	0.291282	LOC101903755
4	105900001	105950000	0.291282	LOC112446446
9	65160001	65210000	0.29022	CEP162
9	65160001	65210000	0.29022	LOC101907581
15	17240001	17290000	0.288546	SLN
3	34180001	34230000	0.288295	SARS
16	63880001	63930000	0.288059	LOC101905857
16	63880001	63930000	0.288059	NPL
18	44740001	44790000	0.286856	GPI
20	33680001	33730000	0.286304	LOC104975270
19	33280001	33330000	0.286293	CENPV
2	96580001	96630000	0.286148	LOC112442974
2	96580001	96630000	0.286148	PIKFYVE
15	44840001	44890000	0.285981	LOC112441571
19	28200001	28250000	0.284502	LOC112442760
10	26020001	26070000	0.284129	LOC538679
11	59120001	59170000	0.28403	LRRTM4
11	47180001	47230000	0.283008	LOC100335748
11	47180001	47230000	0.283008	LOC112448785
3	80620001	80670000	0.281166	RAVER2
13	40200001	40250000	0.281036	LOC104973781
18	61400001	61450000	0.280925	LOC112442239
8	39460001	39510000	0.28029	JAK2
15	78200001	78250000	0.279471	LOC100336921
15	78200001	78250000	0.279471	LOC785969
15	78200001	78250000	0.279471	LOC790152
15	78200001	78250000	0.279471	LOC790154
10	65200001	65250000	0.279413	MIR2291
10	65200001	65250000	0.279413	SHF
10	65200001	65250000	0.279413	SLC28A2
10	65200001	65250000	0.279413	TRNAH-GUG
10	65200001	65250000	0.279413	TRNAH-GUG
10	65200001	65250000	0.279413	TRNAH-GUG
8	39700001	39750000	0.278962	RCL1
1	146160001	146210000	0.278921	DIP2A
13	43200001	43250000	0.278868	TUBAL3
8	29120001	29170000	0.277803	TTC39B
9	41700001	41750000	0.277687	AFG1L
3	42140001	42190000	0.27753	LOC107132301
5	58580001	58630000	0.277029	LOC100138866
5	58580001	58630000	0.277029	LOC787866
3	93060001	93110000	0.276322	SLC1A7
18	56300001	56350000	0.275915	LOC112442212
10	22900001	22950000	0.275276	LOC525951
12	72320001	72370000	0.275097	LOC112449075
23	26680001	26730000	0.274904	LOC112443756
23	27860001	27910000	0.274762	LOC788634
5	71800001	71850000	0.273846	LARGE1
7	56880001	56930000	0.273151	PRELID2
7	60220001	60270000	0.27081	ADRB2
7	60220001	60270000	0.27081	LOC112447452
28	2200001	2250000	0.26977	GALNT2
28	2200001	2250000	0.26977	LOC112444763
17	14420001	14470000	0.268963	GAB1
14	22700001	22750000	0.268278	XKR4
8	68440001	68490000	0.267399	LOC112447755
2	580001	630000	0.267132	OCA2
15	79080001	79130000	0.266755	LOC785680
15	79080001	79130000	0.266755	OR5T2
7	50200001	50250000	0.265778	CTNNA1
3	109540001	109590000	0.262463	SH3D21
3	109540001	109590000	0.262463	THRAP3
14	27960001	28010000	0.262068	NKAIN3
7	52700001	52750000	0.261641	DIAPH1
8	60100001	60150000	0.261015	LOC618828
8	60100001	60150000	0.261015	LOC784922
6	8720001	8770000	0.259758	LOC112447034
22	56000001	56050000	0.25862	LOC112443536
22	56000001	56050000	0.25862	LOC112443556
15	45800001	45850000	0.257431	LOC617571
15	45800001	45850000	0.257431	OR2D2
1	56920001	56970000	0.257232	SLC9C1
3	9120001	9170000	0.25701	CD84
3	9120001	9170000	0.25701	SLAMF6
3	58040001	58090000	0.256921	COL24A1
13	43600001	43650000	0.256429	LOC527068
25	35680001	35730000	0.256202	LOC101909082
13	40160001	40210000	0.253397	LOC112449374
5	71380001	71430000	0.253101	TIMP3
5	58140001	58190000	0.25293	OR6C2
10	58720001	58770000	0.252881	DMXL2
10	58720001	58770000	0.252881	LOC112448482
23	31060001	31110000	0.252525	TRNAI-UAU
23	31060001	31110000	0.252525	TRNAT-CGU
3	35000001	35050000	0.252293	LOC112446161
3	35000001	35050000	0.252293	LOC534742
3	35000001	35050000	0.252293	LOC615258
23	30640001	30690000	0.252086	LOC529518
23	30640001	30690000	0.252086	LOC615902
23	30640001	30690000	0.252086	LOC619021
5	59400001	59450000	0.251889	LOC788512
2	64680001	64730000	0.25164	NCKAP5
3	98200001	98250000	0.250636	LOC112446018
20	23420001	23470000	0.249733	DDX4
20	23420001	23470000	0.249733	SLC38A9
18	62960001	63010000	0.24951	LOC510520
23	31120001	31170000	0.249448	TRNAC-GCA
23	31120001	31170000	0.249448	TRNAS-AGA
23	31120001	31170000	0.249448	ZNF184
13	10700001	10750000	0.247053	NANP
13	10700001	10750000	0.247053	TRNAE-CUC
19	11060001	11110000	0.246781	MED13
11	46640001	46690000	0.24666	IL36G
15	51300001	51350000	0.246469	NUP98
4	82580001	82630000	0.245132	LOC112446411
4	82580001	82630000	0.245132	LOC112446412
4	82580001	82630000	0.245132	LOC112446413
25	36380001	36430000	0.244789	LOC112444277
25	36380001	36430000	0.244789	ZKSCAN1
25	36380001	36430000	0.244789	ZSCAN21
14	26920001	26970000	0.242339	CLVS1
12	71580001	71630000	0.242032	LOC107131218

## Sheet: Sheet10
Table S10. Summary of genes from XP-EHH.
Chrom	Starting position	Ending position	XP-EHH	Gene
26	38560001	38610000	4.43	FAM204A
5	65520001	65570000	4.4	CHPT1
26	38480001	38530000	4.4	LOC112444511
5	65520001	65570000	4.4	SYCP3
5	65500001	65550000	4.26	MYBPC1
19	28180001	28230000	4.22	MYH10
5	65540001	65590000	4.14	GNPTAB
8	560001	610000	4.08	ANXA10
2	53100001	53150000	4	ARHGAP15
8	780001	830000	3.89	PALLD
19	28160001	28210000	3.85	LOC112442832
4	44520001	44570000	3.84	DNAJC2
4	44520001	44570000	3.84	PMPCB
4	44520001	44570000	3.84	PSMC2
8	760001	810000	3.79	LOC112447764
2	61400001	61450000	3.78	DARS
15	22140001	22190000	3.77	ALG9
1	111740001	111790000	3.75	GMPS
7	48620001	48670000	3.73	SPOCK1
21	22240001	22290000	3.73	ZNF774
21	22240001	22290000	3.73	ZSCAN2
4	44500001	44550000	3.68	ARMC10
22	44580001	44630000	3.68	ERC2
4	44500001	44550000	3.68	NAPEPLD
4	62900001	62950000	3.66	BMPER
15	61800001	61850000	3.66	DCDC1
26	42580001	42630000	3.66	LOC617705
19	28280001	28330000	3.63	LOC101904013
19	28200001	28250000	3.63	LOC112442760
19	28280001	28330000	3.63	MFSD6L
21	43560001	43610000	3.63	NPAS3
19	28280001	28330000	3.63	PIK3R6
4	44540001	44590000	3.61	SLC26A5
25	25280001	25330000	3.6	KIAA0556
25	24640001	24690000	3.57	C25H16orf82
9	39600001	39650000	3.57	CDK19
25	24640001	24690000	3.57	LOC112444347
9	39600001	39650000	3.57	LOC112448039
25	25260001	25310000	3.55	TRNAG-UCC
25	25300001	25350000	3.54	GSG1L
11	3560001	3610000	3.53	CNGA3
11	3560001	3610000	3.53	LOC112448738
11	3560001	3610000	3.53	VWA3B
1	137060001	137110000	3.52	DNAJC13
2	61440001	61490000	3.46	MCM6
8	320001	370000	3.46	MFSD14B
3	98220001	98270000	3.45	LOC112446157
22	53380001	53430000	3.4	CCR9
25	35340001	35390000	3.4	COL26A1
22	53380001	53430000	3.4	FYCO1
25	35340001	35390000	3.4	LOC104970468
19	26380001	26430000	3.36	CAMTA2
19	26380001	26430000	3.36	INCA1
19	26380001	26430000	3.36	KIF1C
19	26380001	26430000	3.36	LOC100848357
26	42560001	42610000	3.35	C26H10orf120
15	82300001	82350000	3.35	DTX4
28	34500001	34550000	3.35	LOC112444769
15	82300001	82350000	3.35	MPEG1
19	57160001	57210000	3.33	LOC101907074
19	57160001	57210000	3.33	RPL38
19	57160001	57210000	3.33	TTYH2
3	98200001	98250000	3.32	LOC112446018
25	25200001	25250000	3.32	TRNAG-UCC
9	39720001	39770000	3.31	SLC22A16
5	71300001	71350000	3.31	SYN3
19	28260001	28310000	3.29	CCDC42
19	26420001	26470000	3.29	ENO3
19	26420001	26470000	3.29	GP1BA
19	26420001	26470000	3.29	PFN1
19	26420001	26470000	3.29	RNF167
19	26420001	26470000	3.29	SLC25A11
19	26420001	26470000	3.29	SPAG7
21	69660001	69710000	3.28	LOC104972824
5	19700001	19750000	3.28	LOC112446651
21	69660001	69710000	3.28	MTA1
21	69660001	69710000	3.28	PACS2
14	36440001	36490000	3.28	SBSPON
21	69660001	69710000	3.28	TEX22
3	98260001	98310000	3.28	TRABD2B
21	22100001	22150000	3.26	IQGAP1
9	39220001	39270000	3.26	SLC16A10
10	75140001	75190000	3.25	KCNH5
6	68140001	68190000	3.25	LOC112447158
21	22260001	22310000	3.25	WDR73
27	34020001	34070000	3.24	PLEKHA2
27	34020001	34070000	3.24	TRNAG-CCC
11	2840001	2890000	3.23	FAM178B
26	42540001	42590000	3.23	SPADH1
15	64800001	64850000	3.22	ABTB2
13	11080001	11130000	3.21	LOC112449356
13	11080001	11130000	3.21	LOC112449360
13	11080001	11130000	3.21	LOC112449361
13	11080001	11130000	3.21	LOC112449366
21	22520001	22570000	3.21	SLC28A1
26	42520001	42570000	3.21	SPADH2
27	41880001	41930000	3.21	THRB
13	11080001	11130000	3.21	TRNAC-GCA
19	36800001	36850000	3.19	KAT7
26	38320001	38370000	3.19	LOC112444480
19	28320001	28370000	3.19	PIK3R5
19	36800001	36850000	3.19	TAC4
2	125800001	125850000	3.19	WASF2
11	82860001	82910000	3.18	BET1L
11	82860001	82910000	3.18	NBAS
11	82860001	82910000	3.18	ODF3
11	82860001	82910000	3.18	PSMD13
11	82860001	82910000	3.18	RIC8A
11	82860001	82910000	3.18	SCGB1C1
11	82860001	82910000	3.18	SIRT3
7	31000001	31050000	3.18	SNX2
2	125780001	125830000	3.17	AHDC1
1	56800001	56850000	3.17	TMPRSS7
18	17320001	17370000	3.16	LOC112442233
9	25060001	25110000	3.16	LOC112448123
9	25060001	25110000	3.16	LOC112448124
27	41940001	41990000	3.15	LOC112444600
27	41940001	41990000	3.15	NR1D2
27	34220001	34270000	3.14	ADAM32
27	34220001	34270000	3.14	ADAM9
22	54440001	54490000	3.14	ATP2B2
29	10480001	10530000	3.14	DLG2
13	10520001	10570000	3.14	SNRPB2
7	44560001	44610000	3.13	HSPA4
26	42660001	42710000	3.13	LOC100295742
7	17500001	17550000	3.13	LOC112447356
7	17500001	17550000	3.13	LOC112447600
7	44560001	44610000	3.13	LOC112447663
26	42660001	42710000	3.13	LOC510536
7	17500001	17550000	3.13	LOC518134
9	33400001	33450000	3.13	ROS1
7	44560001	44610000	3.13	ZCCHC10
21	22500001	22550000	3.12	ALPK3
14	16180001	16230000	3.12	KLHL38
26	42500001	42550000	3.12	LOC100295703
14	16180001	16230000	3.12	LOC112449619
22	53360001	53410000	3.11	CXCR6
19	33300001	33350000	3.11	LOC104975044
19	33300001	33350000	3.11	NCOR1
19	33300001	33350000	3.11	PIGL
25	24800001	24850000	3.1	KDM8
8	85560001	85610000	3.1	LOC100141230
8	85560001	85610000	3.1	LOC101907893
18	44640001	44690000	3.1	LSM14A
25	24800001	24850000	3.1	NSMCE1
19	33680001	33730000	3.09	SPECC1
9	102280001	102330000	3.08	AFDN
7	44540001	44590000	3.08	AFF4
4	28740001	28790000	3.08	MACC1
4	28520001	28570000	3.08	TMEM196
21	22400001	22450000	3.07	MIR2364
21	22400001	22450000	3.07	ZNF592
10	26520001	26570000	3.06	LOC104973102
19	36780001	36830000	3.06	LOC104975064
10	26520001	26570000	3.06	LOC112448429
9	25120001	25170000	3.06	MIR2284O
17	64700001	64750000	3.06	MIR6521
27	34260001	34310000	3.06	TRNAR-ACG
17	64700001	64750000	3.06	WSCD2
16	8140001	8190000	3.05	LOC100848559
16	8140001	8190000	3.05	LOC112441780
11	82880001	82930000	3.04	COX8B
12	18580001	18630000	3.04	LOC101903925
8	3180001	3230000	3.04	LOC104969247
17	51660001	51710000	3.03	LOC100847522
14	40500001	40550000	3.03	LOC101904449
21	62900001	62950000	3.03	LOC112443166
21	22380001	22430000	3.03	LOC112443242
6	102220001	102270000	3.02	HSD17B11
18	44660001	44710000	3.02	KIAA0355
12	32320001	32370000	3.02	LNX2
18	39980001	40030000	3.02	LOC112442305
12	32320001	32370000	3.02	POLR1D
19	33280001	33330000	3.01	CENPV
7	17520001	17570000	3.01	LOC508459
22	54420001	54470000	3.01	MIR885
8	83440001	83490000	3.01	ZNF782
4	77000001	77050000	3	CAMK2B
2	125820001	125870000	3	LOC112443702
3	51280001	51330000	2.99	BTBD8
25	35360001	35410000	2.99	IFT22
25	35360001	35410000	2.99	LOC101902066
3	51280001	51330000	2.99	LOC104971636
3	80340001	80390000	2.99	TRNAG-GCC
2	125180001	125230000	2.98	EYA3
2	125180001	125230000	2.98	LOC107131363
28	34520001	34570000	2.98	LOC112444771
2	125180001	125230000	2.98	PTAFR
14	67020001	67070000	2.97	CPQ
16	5100001	5150000	2.97	LOC515150
14	67020001	67070000	2.97	TRNAC-ACA
15	82260001	82310000	2.96	LOC112441663
6	68200001	68250000	2.96	LOC112447077
3	51300001	51350000	2.95	EPHX4
24	61800001	61850000	2.95	LOC511695
24	61800001	61850000	2.95	SERPINB12
13	47780001	47830000	2.94	GPCPD1
7	17640001	17690000	2.94	LOC112447357
13	47780001	47830000	2.94	LOC513580
4	76980001	77030000	2.94	NUDCD3
26	38300001	38350000	2.94	RAB11FIP2
22	44620001	44670000	2.94	TRNAG-UCC
7	17640001	17690000	2.94	VAV1
21	69700001	69750000	2.93	CRIP2
9	66080001	66130000	2.92	PTPRK
20	33620001	33670000	2.91	CARD6
5	113440001	113490000	2.91	CYB5R3
20	33620001	33670000	2.91	LOC112443039
5	113440001	113490000	2.91	LOC112446886
3	116940001	116990000	2.91	MLPH
5	113440001	113490000	2.91	POLDIP3
20	33620001	33670000	2.91	RPL37
5	113440001	113490000	2.91	RRP7A
26	44220001	44270000	2.9	FAM53B
2	61500001	61550000	2.9	LCT
26	44220001	44270000	2.9	LHPP
26	44220001	44270000	2.9	LOC112444509
9	102200001	102250000	2.9	LOC112448148
11	82900001	82950000	2.9	NLRP6
28	36000001	36050000	2.9	SH2D4B
12	24120001	24170000	2.9	TRPC4
22	55280001	55330000	2.89	ATG7
9	82940001	82990000	2.89	EPM2A
19	40580001	40630000	2.89	GJD3
22	55280001	55330000	2.89	HRH1
19	40580001	40630000	2.89	RARA
19	40580001	40630000	2.89	TOP2A
3	92240001	92290000	2.88	HSPB11
13	11100001	11150000	2.88	LOC505099
3	92240001	92290000	2.88	LRRC42
11	300001	350000	2.87	FBLN7
11	62560001	62610000	2.87	PELI1
11	320001	370000	2.87	TMEM87B
5	29060001	29110000	2.86	ATF1
2	53840001	53890000	2.86	KYNU
22	54460001	54510000	2.86	LOC104975597
2	126340001	126390000	2.86	SFN
5	29060001	29110000	2.86	TMPRSS12
2	126340001	126390000	2.86	ZDHHC18
15	22180001	22230000	2.85	C15H11orf1
8	83520001	83570000	2.85	CTSV
15	22180001	22230000	2.85	FDXACB1
6	8760001	8810000	2.85	LOC104972658
9	60740001	60790000	2.84	ANKRD6
2	125160001	125210000	2.84	DNAJC8
24	25800001	25850000	2.84	DSG1
22	50060001	50110000	2.84	GNAI2
11	82920001	82970000	2.84	IFITM5
22	50060001	50110000	2.84	IFRD2
9	60740001	60790000	2.84	LOC101903075
24	25800001	25850000	2.84	LOC101904557
14	23240001	23290000	2.84	LOC112449628
22	50060001	50110000	2.84	LSMEM2
14	23240001	23290000	2.84	LYN
11	82920001	82970000	2.84	PGGHG
20	33640001	33690000	2.84	PRKAA1
14	23240001	23290000	2.84	RPS20
9	60740001	60790000	2.84	RRAGD
22	50060001	50110000	2.84	SEMA3B
2	126060001	126110000	2.84	SLC9A1
6	21440001	21490000	2.84	TACR3
2	126060001	126110000	2.84	TRNAE-UUC
15	22080001	22130000	2.83	LOC101906330
4	76960001	77010000	2.83	LOC104972146
5	89220001	89270000	2.83	PDE3A
15	22080001	22130000	2.83	PPP2R1B
19	33700001	33750000	2.82	AKAP10
12	85300001	85350000	2.82	ANKRD10
7	14560001	14610000	2.82	COL5A3
7	14560001	14610000	2.82	LOC528040
3	80320001	80370000	2.82	MIR101-1
13	10720001	10770000	2.82	NINL
7	14560001	14610000	2.82	RDH8
22	42900001	42950000	2.81	KCTD6
19	59060001	59110000	2.81	LOC101902884
22	42900001	42950000	2.81	PDHB
22	42900001	42950000	2.81	PXK
19	59060001	59110000	2.81	TRNAG-UCC
6	11580001	11630000	2.8	ARSJ
4	110340001	110390000	2.8	CNTNAP2
19	36820001	36870000	2.8	FAM117A
15	79020001	79070000	2.8	LOC100141189
15	79020001	79070000	2.8	LOC100300545
19	36820001	36870000	2.8	LOC101902801
6	11580001	11630000	2.8	LOC104972660
15	79020001	79070000	2.8	LOC104974341
15	79020001	79070000	2.8	OR8H3
10	60360001	60410000	2.79	ATP8B4
8	85380001	85430000	2.79	LOC104969435
8	85380001	85430000	2.79	LOC112447831
8	85380001	85430000	2.79	PTPDC1
8	85540001	85590000	2.79	ZNF169
2	125140001	125190000	2.78	ATP5IF1
7	11780001	11830000	2.78	C7H19orf57
7	11780001	11830000	2.78	CC2D1A
3	9120001	9170000	2.78	CD84
21	22880001	22930000	2.78	CPEB1
6	67700001	67750000	2.78	DCUN1D4
6	67700001	67750000	2.78	LOC101905687
21	22880001	22930000	2.78	LOC112443326
7	11780001	11830000	2.78	LOC112447338
7	11780001	11830000	2.78	LOC112447339
7	11780001	11830000	2.78	MIR181C
7	11780001	11830000	2.78	MIR181D
8	85420001	85470000	2.78	MIRLET7A-1
8	85420001	85470000	2.78	MIRLET7D
8	85420001	85470000	2.78	MIRLET7F-1
11	2820001	2870000	2.78	SEMA4C
3	9120001	9170000	2.78	SLAMF6
6	67680001	67730000	2.77	CWH43
29	40620001	40670000	2.77	INCENP
24	61880001	61930000	2.77	LOC100337223
19	47140001	47190000	2.77	LOC112442682
24	61880001	61930000	2.77	LOC112444162
24	61880001	61930000	2.77	LOC511106
24	61880001	61930000	2.77	LOC519132
29	50940001	50990000	2.77	LOC613699
19	47140001	47190000	2.77	2022-03-10
11	62580001	62630000	2.76	LOC107132935
10	60380001	60430000	2.76	LOC112448488
12	54660001	54710000	2.76	LOC617043
4	63020001	63070000	2.76	MIR1814C
9	60780001	60830000	2.76	MIR2903
6	87720001	87770000	2.76	TRNAC-GCA
9	60780001	60830000	2.76	UBE2J1
9	65160001	65210000	2.75	CEP162
9	65160001	65210000	2.75	LOC101907581
8	1000001	1050000	2.75	LOC112447762
21	22280001	22330000	2.75	NMB
21	22280001	22330000	2.75	SEC11A
14	16200001	16250000	2.74	LOC112449620
4	92100001	92150000	2.74	LRRC4
4	92100001	92150000	2.74	SND1
16	9660001	9710000	2.74	TRNAK-UUU
1	56900001	56950000	2.73	C1H3orf52
5	43900001	43950000	2.73	FRS2
1	56900001	56950000	2.73	GCSAM
1	5660001	5710000	2.73	KRTAP24-1
17	51680001	51730000	2.73	LOC101904642
5	43900001	43950000	2.73	MIR2427
17	51680001	51730000	2.73	ZNF664
10	26000001	26050000	2.72	ARHGEF40
10	26000001	26050000	2.72	LOC100300237
10	26000001	26050000	2.72	LOC104973100
10	26000001	26050000	2.72	RNASE13
10	26000001	26050000	2.72	ZNF219
3	51160001	51210000	2.71	C3H1orf146
5	43880001	43930000	2.71	CCT2
4	4820001	4870000	2.71	COBL
29	49700001	49750000	2.71	CTSD
3	51160001	51210000	2.71	GLMN
1	143680001	143730000	2.71	HSF2BP
29	49700001	49750000	2.71	IFITM10
1	143680001	143730000	2.71	RRP1B
2	126320001	126370000	2.7	GPATCH3
2	126320001	126370000	2.7	GPN2
19	28060001	28110000	2.7	NDEL1
12	40340001	40390000	2.7	PCDH9
2	126000001	126050000	2.7	WDTC1
21	22080001	22130000	2.69	CRTC3
26	42680001	42730000	2.69	FAM24A
22	18720001	18770000	2.69	GRM7
22	18720001	18770000	2.69	LOC104975516
15	25160001	25210000	2.69	NXPE2
15	79040001	79090000	2.69	OR5T2
4	116880001	116930000	2.68	DPP6
27	35020001	35070000	2.68	IDO1
27	35020001	35070000	2.68	IDO2
29	50960001	51010000	2.68	IFITM3
29	50960001	51010000	2.68	LOC101904625
22	44520001	44570000	2.68	LOC104975557
29	50960001	51010000	2.68	LOC112444847
22	44520001	44570000	2.68	MIR2371
4	116880001	116930000	2.68	PAXIP1
17	29440001	29490000	2.68	PGRMC2
21	22840001	22890000	2.68	RPS17
27	35000001	35050000	2.67	LOC101905820
3	9140001	9190000	2.67	LOC112445930
11	66800001	66850000	2.67	PLEK
27	34000001	34050000	2.67	TACC1
4	119480001	119530000	2.66	ESYT2
11	82940001	82990000	2.66	IFITM2
11	82940001	82990000	2.66	LOC112441484
17	5060001	5110000	2.66	LOC112441989
4	119480001	119530000	2.66	LOC112446466
11	82940001	82990000	2.66	LOC112448823
1	7200001	7250000	2.66	LOC615183
1	7200001	7250000	2.66	LTN1
3	93180001	93230000	2.66	PODN
3	93180001	93230000	2.66	SCP2
17	5060001	5110000	2.66	TRNAY-GUA
4	119480001	119530000	2.66	WDR60
11	66820001	66870000	2.65	APLF
1	73120001	73170000	2.65	ATP13A3
11	3800001	3850000	2.65	COA5
11	66820001	66870000	2.65	FBXO48
1	73120001	73170000	2.65	GP5
12	9280001	9330000	2.65	LOC100141168
7	52400001	52450000	2.65	LOC100848177
12	84520001	84570000	2.65	LOC101905776
1	73120001	73170000	2.65	LOC112447393
22	53060001	53110000	2.65	LOC529196
1	73120001	73170000	2.65	LRRC15
11	3800001	3850000	2.65	MGAT4A
7	52400001	52450000	2.65	PCDHGA2
2	18980001	19030000	2.65	PDE11A
3	8960001	9010000	2.65	SLAMF1
7	52400001	52450000	2.65	TAF7
11	3800001	3850000	2.65	UNC50
1	72420001	72470000	2.65	XXYLT1
13	43040001	43090000	2.64	ASB13
5	111340001	111390000	2.64	FAM83F
29	50920001	50970000	2.64	IFITM1
29	50920001	50970000	2.64	IFITM3
10	60400001	60450000	2.64	LOC112448487
13	10700001	10750000	2.64	NANP
6	67960001	68010000	2.64	SPATA18
10	18380001	18430000	2.64	THSD4
13	10700001	10750000	2.64	TRNAE-CUC
22	54400001	54450000	2.64	TRNAK-UUU
19	57140001	57190000	2.63	DNAI2
24	61860001	61910000	2.63	LOC112444161
3	9100001	9150000	2.63	LOC112445929
8	84660001	84710000	2.63	LOC112447921
24	61860001	61910000	2.63	LOC786348
5	43860001	43910000	2.63	LRRC10
11	340001	390000	2.63	MERTK
5	66020001	66070000	2.63	PARPBP
5	66020001	66070000	2.63	PMCH
6	116500001	116550000	2.63	POLN
29	40640001	40690000	2.63	SCGB1D
8	84660001	84710000	2.63	WNK2
1	137020001	137070000	2.62	ACAD11
4	62020001	62070000	2.62	DPY19L1
15	82240001	82290000	2.62	FAM111B
25	24860001	24910000	2.62	IL4R
19	41100001	41150000	2.62	KRT23
19	41100001	41150000	2.62	LOC112442836
8	980001	1030000	2.62	LOC112447763
10	26200001	26250000	2.62	LOC517093
10	26200001	26250000	2.62	RNASE1
8	1140001	1190000	2.62	SH3RF1
19	41100001	41150000	2.62	TRNAC-GCA
10	9900001	9950000	2.61	ARSB
5	55600001	55650000	2.61	CTDSP2
29	50280001	50330000	2.61	MUC2
29	50280001	50330000	2.61	MUC5AC
13	10540001	10590000	2.61	OTOR
3	62800001	62850000	2.6	ADGRL2
11	72640001	72690000	2.6	DPYSL5
23	44160001	44210000	2.6	EDN1
11	72640001	72690000	2.6	MAPRE3
13	23680001	23730000	2.6	PIP4K2A
5	113420001	113470000	2.6	SERHL2
1	56920001	56970000	2.6	SLC9C1
5	113420001	113470000	2.6	TRNAG-CCC
11	3060001	3110000	2.6	ZAP70
8	103280001	103330000	2.59	AMBP
5	103080001	103130000	2.59	CD163L1
11	2360001	2410000	2.59	CIAO1
11	55500001	55550000	2.59	CTNNA2
23	4980001	5030000	2.59	GFRAL
18	43500001	43550000	2.59	GPATCH1
23	4980001	5030000	2.59	HMGCLL1
8	103280001	103330000	2.59	KIF12
15	30100001	30150000	2.59	LOC112441620
29	50260001	50310000	2.59	LOC112444915
4	4800001	4850000	2.59	LOC112446350
8	380001	430000	2.59	LOC112447868
11	2360001	2410000	2.59	LOC112448734
3	75620001	75670000	2.59	LRRC7
7	11760001	11810000	2.59	PODNL1
22	42960001	43010000	2.59	RPP14
19	58200001	58250000	2.59	SLC39A11
11	2360001	2410000	2.59	SNRNP200
11	2360001	2410000	2.59	TMEM127
18	43500001	43550000	2.59	WDR88
8	103280001	103330000	2.59	ZNF618
11	2380001	2430000	2.58	ITPRIPL1
2	126260001	126310000	2.58	KDF1
19	41120001	41170000	2.58	KRT39
11	97400001	97450000	2.58	LMX1B
24	39480001	39530000	2.58	LOC101904513
21	62880001	62930000	2.58	LOC112443167
6	8720001	8770000	2.58	LOC112447034
11	97400001	97450000	2.58	LOC112448838
2	126260001	126310000	2.58	NR0B2
2	126260001	126310000	2.58	NUDC
18	43900001	43950000	2.58	PEPD
7	52380001	52430000	2.58	SLC25A2
5	111360001	111410000	2.58	TNRC6B
20	58820001	58870000	2.58	TRIO
16	6360001	6410000	2.57	KCNT2
15	18260001	18310000	2.57	KDELC2
3	116920001	116970000	2.57	LOC104970680
6	102120001	102170000	2.57	LOC112447220
6	102120001	102170000	2.57	LOC112447223
6	102120001	102170000	2.57	LOC781224
1	95760001	95810000	2.57	PLD1
11	3080001	3130000	2.57	TMEM131
22	50080001	50130000	2.57	TRNAE-UUC
3	74820001	74870000	2.56	ANKRD13C
13	43020001	43070000	2.56	FAM208B
9	82860001	82910000	2.56	LOC112448161
8	85600001	85650000	2.56	LOC787410
3	53380001	53430000	2.56	LRRC8D
3	53380001	53430000	2.56	MIR2285K-5
11	66980001	67030000	2.56	PROKR1
13	40020001	40070000	2.56	RALGAPA2
3	51040001	51090000	2.56	RPAP2
22	42980001	43030000	2.55	ABHD6
14	65740001	65790000	2.55	STK3
10	25980001	26030000	2.55	TMEM253
5	65840001	65890000	2.55	WASHC3
11	78220001	78270000	2.54	HS1BP3
6	102100001	102150000	2.54	KLHL8
11	78220001	78270000	2.54	LOC112448819
15	82640001	82690000	2.54	LOC512441
15	82640001	82690000	2.54	OR4D6
15	82640001	82690000	2.54	OR5A1
3	74880001	74930000	2.54	SRSF11
20	33660001	33710000	2.54	TTC33
6	29100001	29150000	2.54	UNC5C
1	106360001	106410000	2.53	B3GALNT1
13	48160001	48210000	2.53	CRLS1
8	111080001	111130000	2.53	EIPR1
12	84540001	84590000	2.53	LOC101905821
8	111080001	111130000	2.53	LOC112447932
13	48160001	48210000	2.53	LOC112449307
15	80240001	80290000	2.53	LOC538839
13	48160001	48210000	2.53	MCM8
1	106360001	106410000	2.53	PPM1L
27	38740001	38790000	2.53	PSD3
8	111080001	111130000	2.53	TRAPPC12
4	75220001	75270000	2.53	TRNAK-CUU
26	46860001	46910000	2.52	DOCK1
14	69660001	69710000	2.52	ESRP1
1	146700001	146750000	2.52	LOC101902630
1	146700001	146750000	2.52	LOC101902902
14	69660001	69710000	2.52	LOC101907668
11	2400001	2450000	2.52	NCAPH
9	25220001	25270000	2.52	TRMT11
19	40540001	40590000	2.51	CDC6
11	2900001	2950000	2.51	COX5B
8	53060001	53110000	2.51	FOXB2
1	56760001	56810000	2.51	LOC112447300
9	66320001	66370000	2.51	LOC112448202
1	56760001	56810000	2.51	TAGLN3
1	128340001	128390000	2.5	CLSTN2
18	44740001	44790000	2.5	GPI
11	3740001	3790000	2.5	INPP4A
10	26500001	26550000	2.5	RNASE11
10	26500001	26550000	2.5	RNASE12
2	125120001	125170000	2.5	SESN2
3	51220001	51270000	2.5	TRNAE-UUC
19	26260001	26310000	2.49	LOC101904050
4	42280001	42330000	2.49	MAGI2
19	26240001	26290000	2.49	RABEP1
19	26260001	26310000	2.49	SCIMP
26	10640001	10690000	2.48	ACTA2
3	92300001	92350000	2.48	DIO1
29	9260001	9310000	2.48	EED
26	10640001	10690000	2.48	FAS
6	111660001	111710000	2.48	LDB2
27	34480001	34530000	2.48	LOC100847151
7	27600001	27650000	2.48	LOC104969133
14	61620001	61670000	2.48	LOC107133128
26	10640001	10690000	2.48	LOC112444519
3	53400001	53450000	2.48	LOC112445993
10	74120001	74170000	2.48	LOC112448613
10	73220001	73270000	2.48	LOC112448663
1	5640001	5690000	2.48	LOC528816
8	1020001	1070000	2.48	MIR2466
1	7220001	7270000	2.48	N6AMT1
3	79040001	79090000	2.48	PDE4B
3	92300001	92350000	2.48	YIPF1
11	2240001	2290000	2.47	ADRA2B
11	2240001	2290000	2.47	ASTL
11	2240001	2290000	2.47	DUSP2
3	101680001	101730000	2.47	ERI3
2	125660001	125710000	2.47	FGR
2	125660001	125710000	2.47	IFI6
11	72600001	72650000	2.47	LOC101906001
11	2240001	2290000	2.47	LOC107132897
11	72600001	72650000	2.47	LOC112448909
3	101680001	101730000	2.47	MIR2414
10	73180001	73230000	2.47	SLC38A6
11	72600001	72650000	2.47	TMEM214
22	53080001	53130000	2.47	TRNAY-GUA
15	31040001	31090000	2.46	ARHGEF12
1	52220001	52270000	2.46	BBX
29	40580001	40630000	2.46	LOC107131971
1	104000001	104050000	2.46	LOC112448289
5	25140001	25190000	2.46	USP44
5	111320001	111370000	2.45	GRAP2
24	39280001	39330000	2.45	LOC100847357
29	7440001	7490000	2.45	LOC104976218
3	60020001	60070000	2.45	PRKACB
7	66880001	66930000	2.45	SGCD
24	39280001	39330000	2.45	TMEM200C

[truncated: 4 more sheets: Sheet11, Sheet12, Sheet13, Sheet14]
