# Supplementary figures and images for: Genetic Diversity and Selective Signature in Dabieshan Cattle Revealed by Whole-Genome Resequencing
Source: MDPI journal article supplement (doi:10.3390/biology11091327), 2022-09-08

## HSPA4

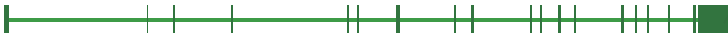

Allele1 G T C C T G T A A A A G

Leu

Allele2 A C A T C A C C C T G C

Pro

Dabieshan  0.687  
0.172

0.172

0.046  
0.0000.031  
0.040

0.016

0.016

0.016

0.900

Hanwoo  0.915

0.067

0.033

Supplement: s1 [file s1]

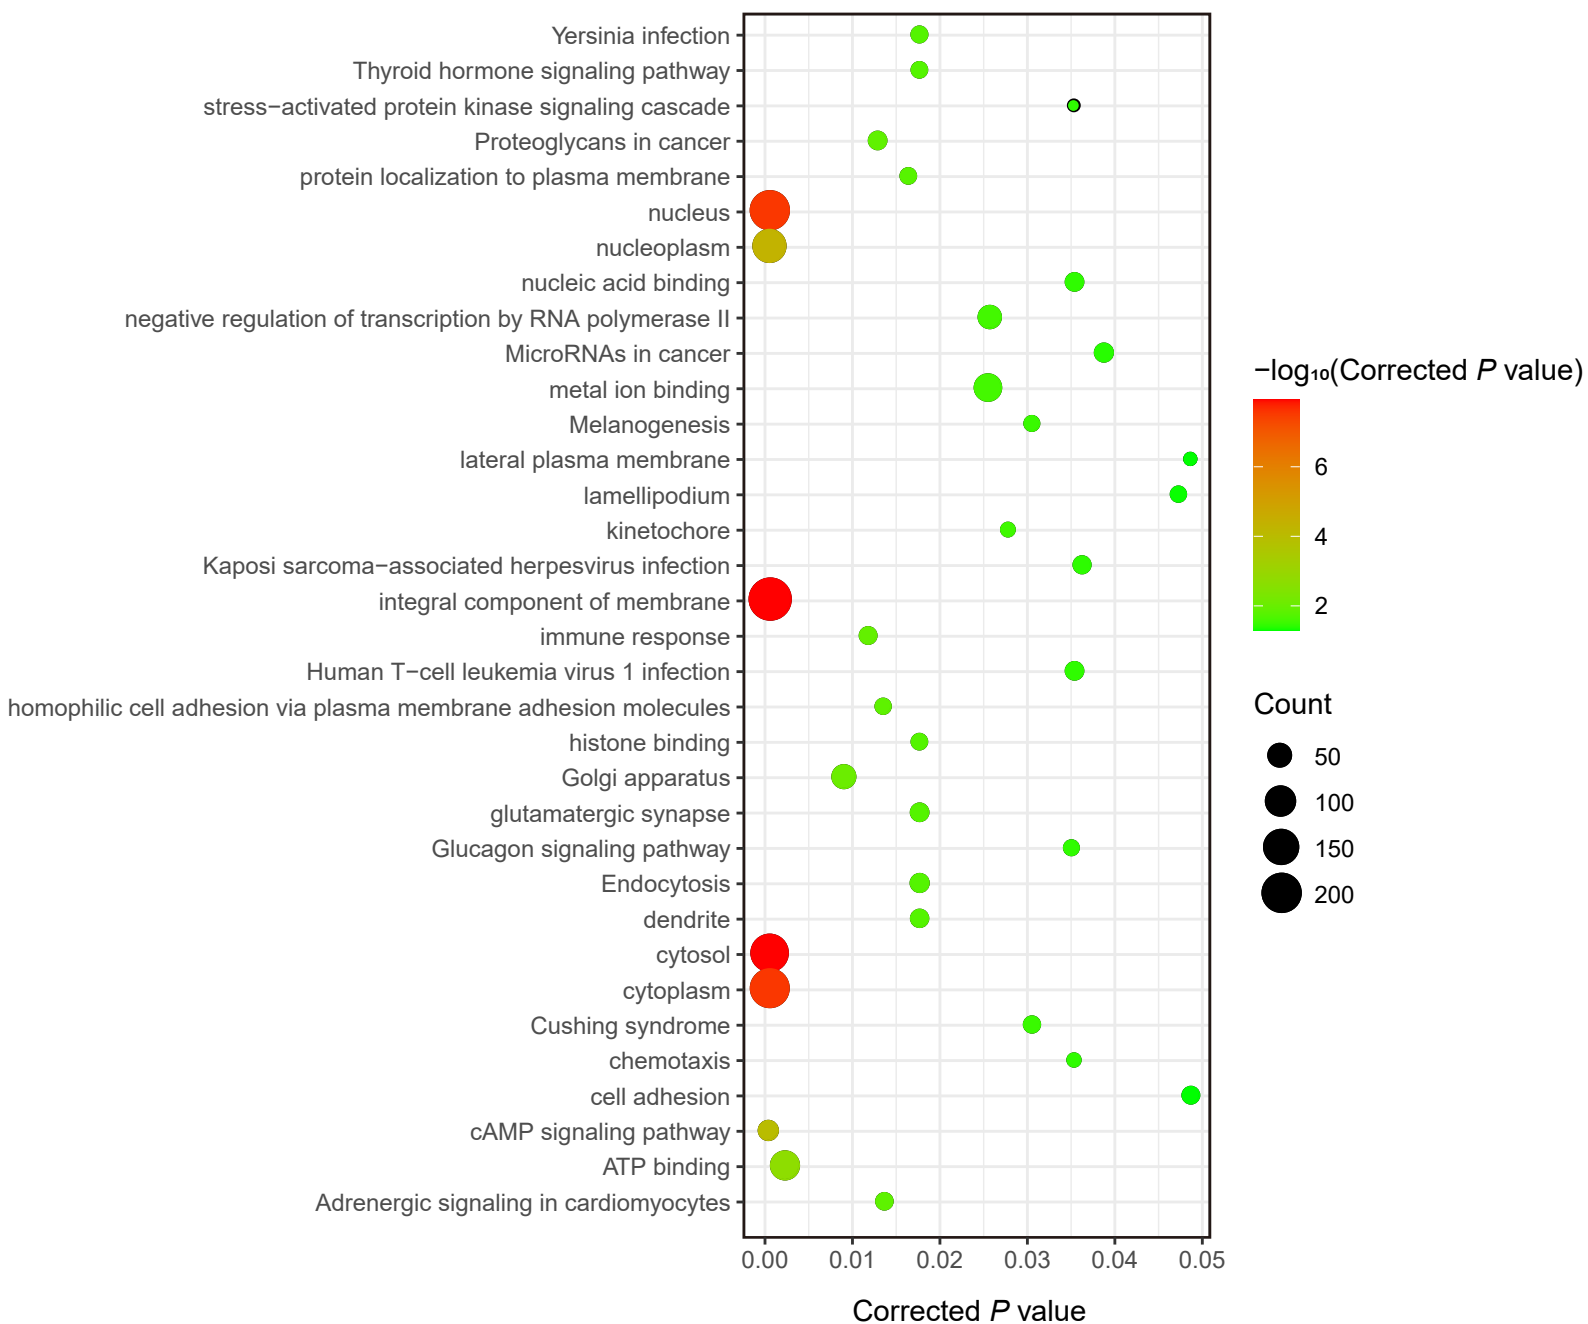

Supplement: s1 [file s1]

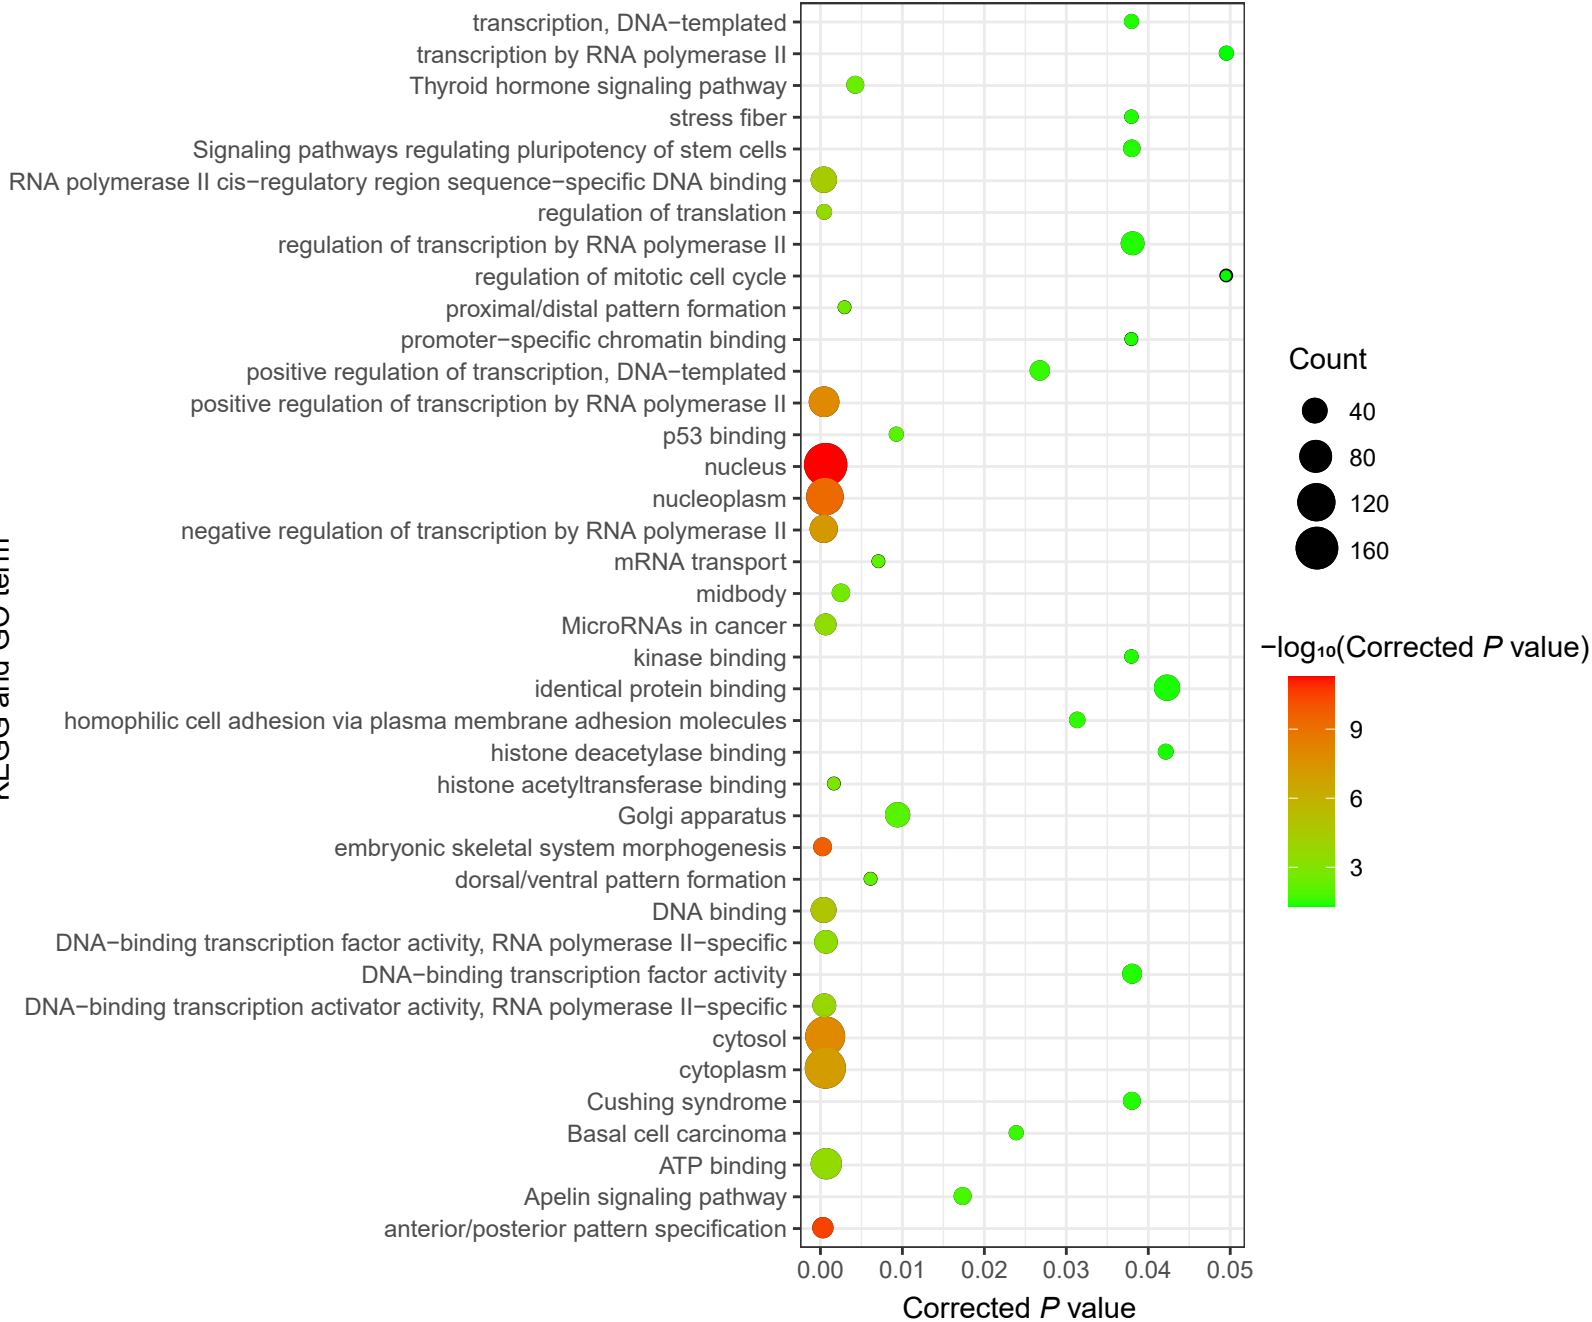

Supplement: s1 [file s1]

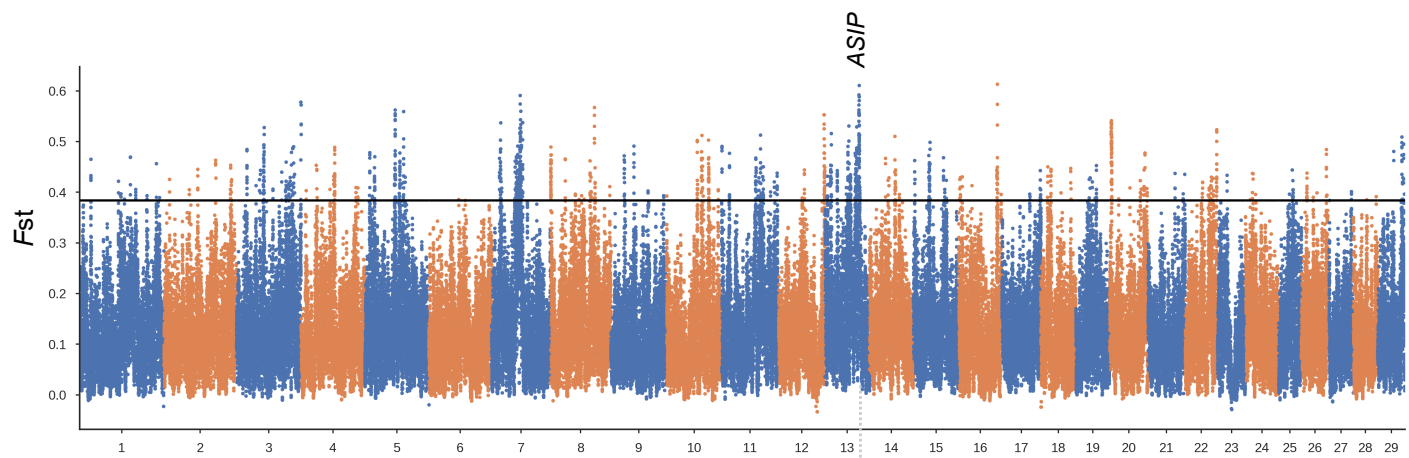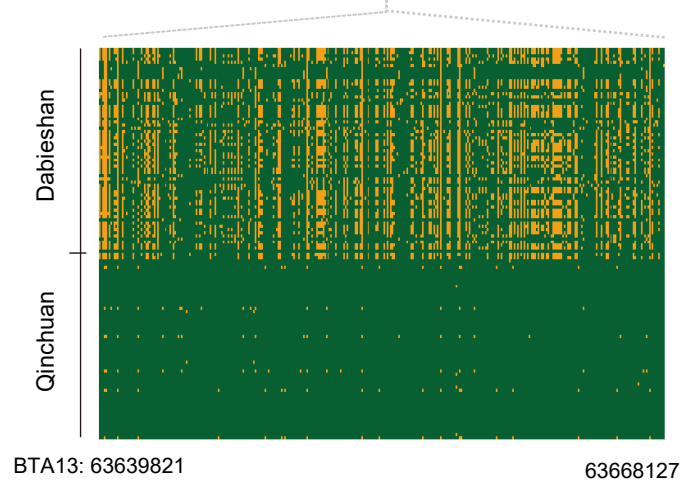

Supplement: s1 [file s1]

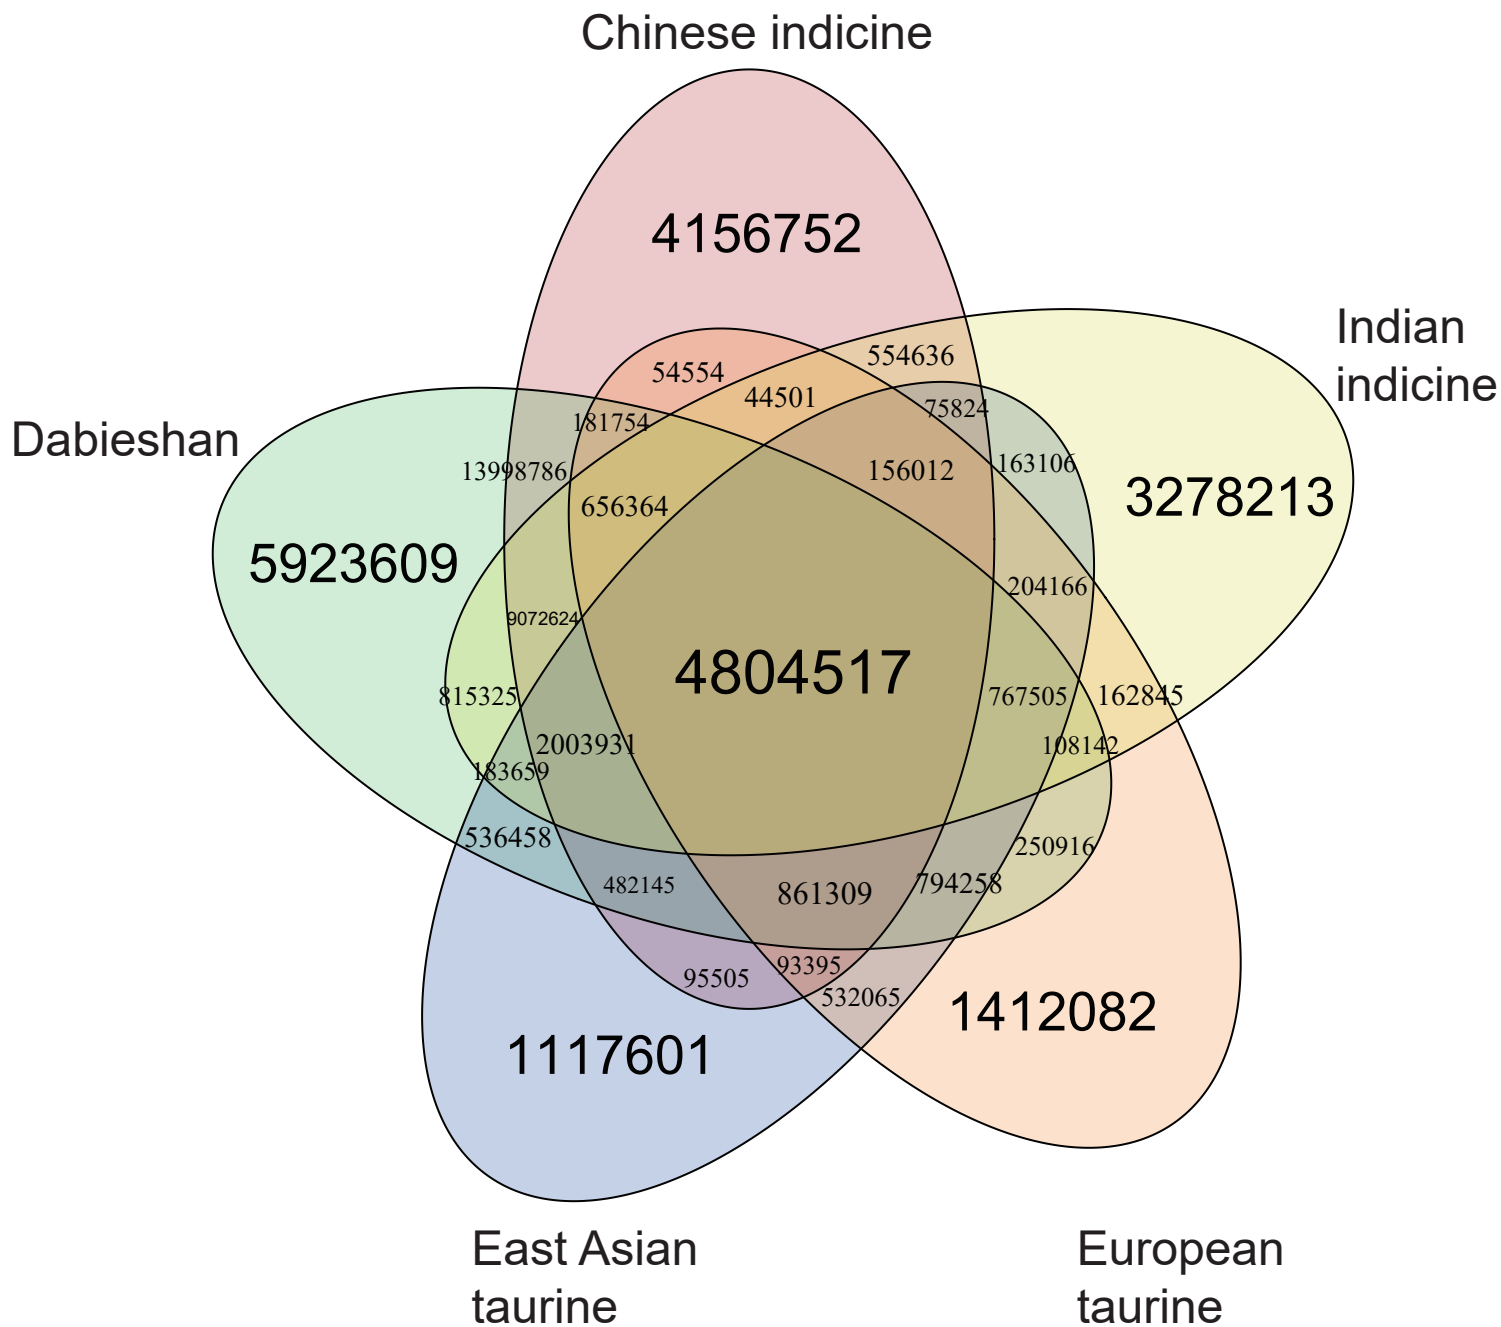

Supplement: s1 [file s1]

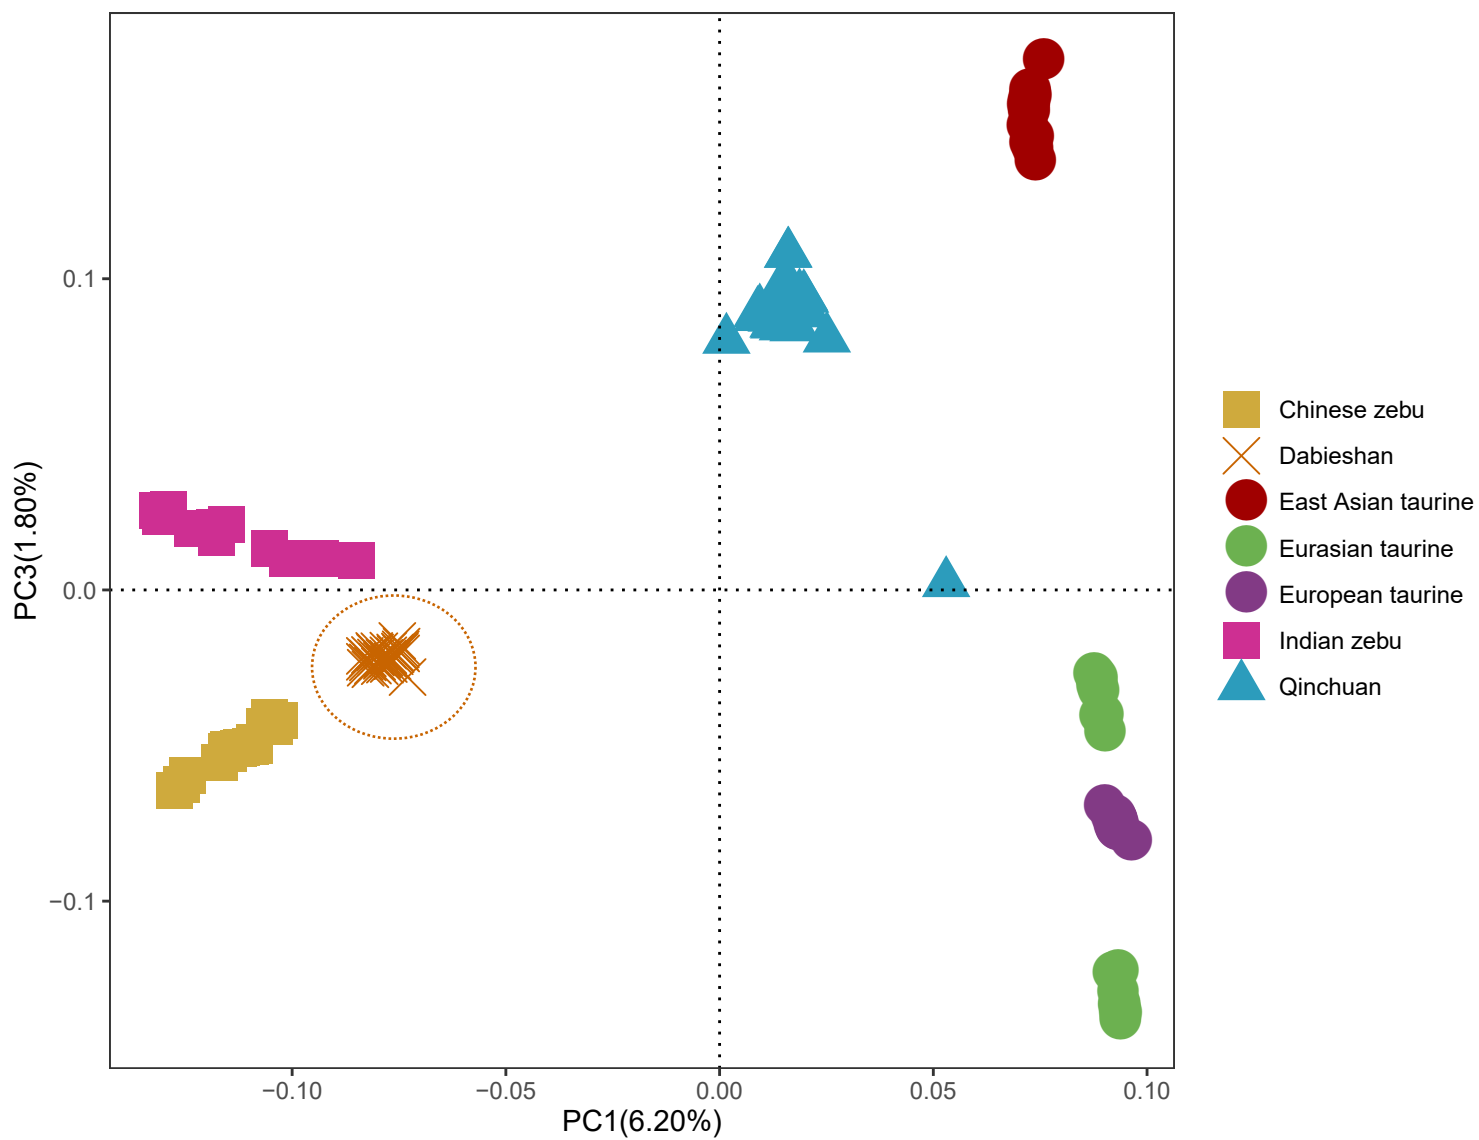

Supplement: s1 [file s1]
